# Supplementary material for: Phosphine-catalyzed [4 + 2] annulation and vinylogous addition reactions between 1,4-dien-3-ones and 1,1-dicyanoalkenes
Source: Royal Society of Chemistry journal article supplement (doi:10.1039/c1ob06187a), 2011-10-06

## Supplementary Information

# Phosphine-Catalyzed [4 + 2] Annulation and Vinylogous Addition Reactions between 1,4-Dien-3-ones and 1,1-Dicyanoalkenes

Rong Zhou, Jianfang Wang, Junjun Tian, and Zhengjie He\*

The State Key Laboratory of Elemento-Organic Chemistry and Department of Chemistry, Nankai University, 94 Weijin Road, Tianjin 300071, P. R. China

## Table of Contents

|                                                                                                          |     |
|----------------------------------------------------------------------------------------------------------|-----|
| I. Experiments for Mechanistic Investigations .....                                                      | S2  |
| II. ORTEP Drawings of ( <i>trans, E</i> )- <b>3b</b> and <b>4b</b> .....                                 | S6  |
| III. <sup>1</sup> H and <sup>13</sup> C NMR Spectra of <b>3</b> , <b>4</b> , <b>5</b> and <b>6</b> ..... | S8  |
| IV. HMQC, HMBC and NOSEY Spectra.....                                                                    | S70 |

## I. Experiments for Mechanistic Investigations

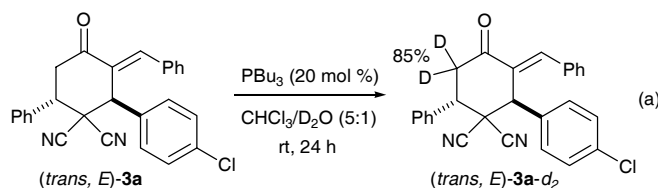

**Experiment (a):** under a  $N_2$  atmosphere, to a solution of (*trans, E*)-**3a** (126 mg, 0.3 mmol) in  $CHCl_3/D_2O$  (3.6 mL, 5:1, V/V) was added  $PBu_3$  (15  $\mu$ L, 0.06 mmol) through a microsyringe. The resulting mixture was stirred at room temperature for 24 h. The reaction mixture was concentrated on a rotary evaporator under reduced pressure and the residue was subjected to column chromatography isolation on silica gel (eluant, petroleum ether–ethyl acetate 10:1) to give a partially deuterated product (*trans, E*)-**3a-d<sub>2</sub>** (Scheme 4, a).

For (*trans, E*)-**3a-d<sub>2</sub>**,  $^1H$  NMR (400 MHz,  $CDCl_3$ ):  $\delta$  7.91 (s, 1H), 7.51 (d,  $J = 8.4$  Hz, 2H), 7.43–7.29 (m, 10H), 7.13 (d,  $J = 7.2$  Hz, 2H), 4.94 (s, 1H), 3.56 (s, 1H), 3.30 (d,  $J = 13.6$  Hz, 0.15 H), 3.13 (d,  $J = 4.9$  Hz, 0.15 H).

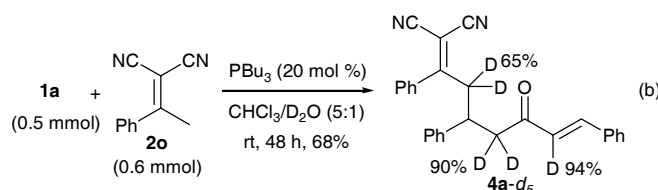

**Experiment (b):** under a  $N_2$  atmosphere, to a solution of styryl ketone **1a** (117 mg, 0.5 mmol) and activated alkenes **2o** (101 mg, 0.6 mmol) in  $CHCl_3/D_2O$  (6 mL, 5:1) was added  $PBu_3$  (25  $\mu$ L, 0.1 mmol). The resulting mixture was stirred at room temperature until **1a** was completely consumed (monitored by TLC). The mixture was concentrated on a rotary evaporator under reduced pressure, and the residue was subjected to column chromatography isolation on silica gel (gradient eluant, petroleum ether–ethyl acetate 20:1–10:1) to give a partially deuterated vinylogous Michael adduct **4a-d<sub>5</sub>** in 68% yield.

For **4a-d<sub>5</sub>**,  $^1H$  NMR (400 MHz,  $CDCl_3$ ):  $\delta$  7.61–7.45 (m, 6H), 7.44–7.34 (m, 5H), 7.33–7.21 (m, 3H), 6.99 (d,  $J = 6.7$  Hz, 2H), 6.65 (d,  $J = 16.2$  Hz, 0.06 H), 3.54 (d,  $J = 4.4$  Hz, 0.1H), 3.31 (d,  $J = 10.2$  Hz, 0.1H), 3.23 (d,  $J = 6.2$  Hz, 1H), 3.11–2.98 (m, 0.70 H).

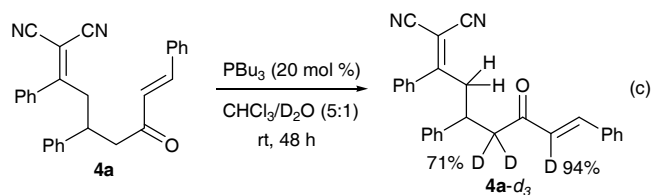

**Experiment (c):** under the same conditions as above, the normal vinylogous Michael adduct **4a** (132 mg, 0.33 mmol) was treated with  $\text{PBu}_3$  (16  $\mu\text{L}$ , 0.066 mmol) in  $\text{CHCl}_3/\text{D}_2\text{O}$  (3 mL, 5:1) at room temperature for 48 h. After the same work-up and chromatographic isolation as that of experiment (b), a partially deuterated product **4a-d<sub>3</sub>** was obtained in almost quantitative yield.

For **4a-d<sub>3</sub>**,  $^1\text{H NMR}$  (400 MHz,  $\text{CDCl}_3$ ):  $\delta$  7.61–7.45 (m, 6H), 7.44–7.34 (m, 5H), 7.33–7.21 (m, 3H), 6.99 (d,  $J = 7.1$  Hz, 2H), 6.65 (d,  $J = 16.2$  Hz, 0.06 H), 3.54 (d,  $J = 4.4$  Hz, 0.29H), 3.31 (d,  $J = 10.5$  Hz, 0.29H), 3.26–3.21 (m, 1H), 3.10–2.96 (m, 2H).

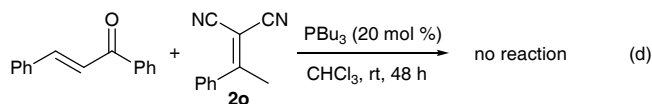

**Experiment (d):** under a  $\text{N}_2$  atmosphere, to a solution of chalcone (104 mg, 0.5 mmol) and activated alkene **2o** (101 mg, 0.6 mmol) in  $\text{CHCl}_3$  (5 mL) was added  $\text{PBu}_3$  (25  $\mu\text{L}$ , 0.1 mmol). The resulting mixture was stirred at room temperature for 48 h. Except starting materials, no vinylogous Michael adduct was detected by TLC during the entire process.

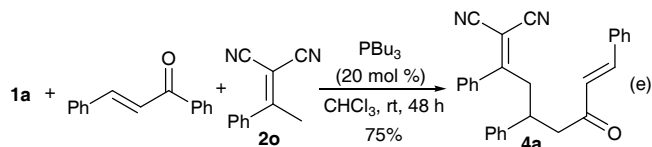

**Experiment (e):** under a  $\text{N}_2$  atmosphere, to a solution of **1a** (117 mg, 0.5 mmol), chalcone (104 mg, 0.5 mmol), and activated alkene **2o** (101 mg, 0.6 mmol) in  $\text{CHCl}_3$  (5 mL) was added  $\text{PBu}_3$  (25  $\mu\text{L}$ , 0.1 mmol). The resulting mixture was stirred at room temperature for 48 h. The reaction mixture was concentrated on a rotary evaporator under reduced pressure, and the residue was subjected to column chromatography isolation on silica gel (gradient eluant, petroleum ether–ethyl acetate 20:1–10:1) to give vinylogous Michael adduct **4a** in 75% yield and a complete recovery of chalcone.

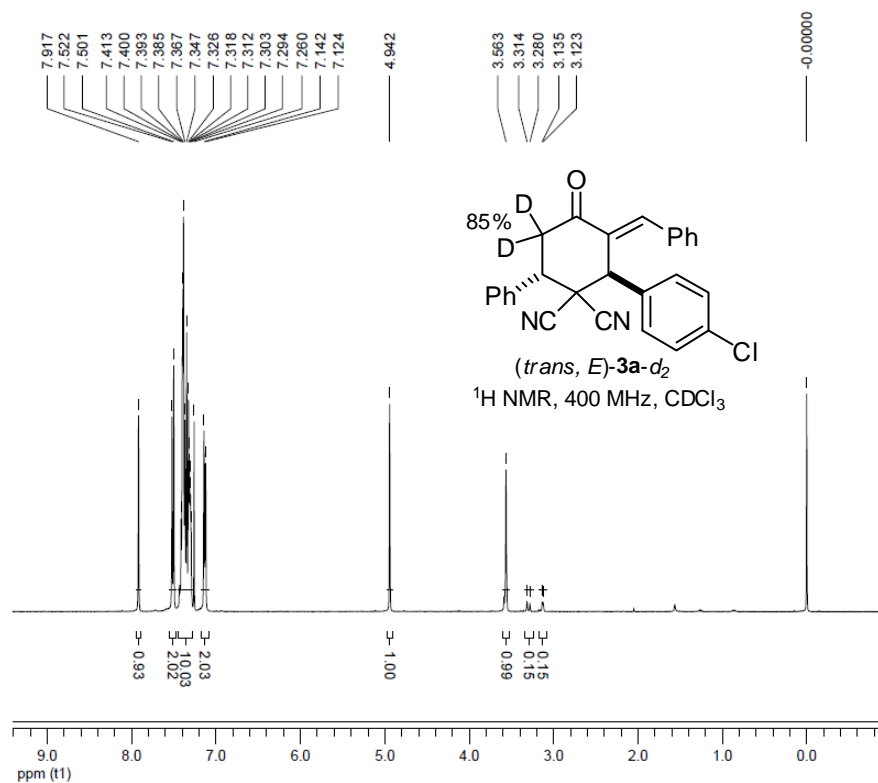

Date: 13 Sep 2011  
 Document's Title: n  
 Spectrum Title: PROTON  
 Frequency (MHz): (f1) 400.130  
 Original Points Count: (f1) 32768  
 Actual Points Count: (f1) 32768  
 Acquisition Time (sec): (f1) 3.9846  
 Spectral Width (ppm): (f1) 20.553  
 Pulse Program: Unknown

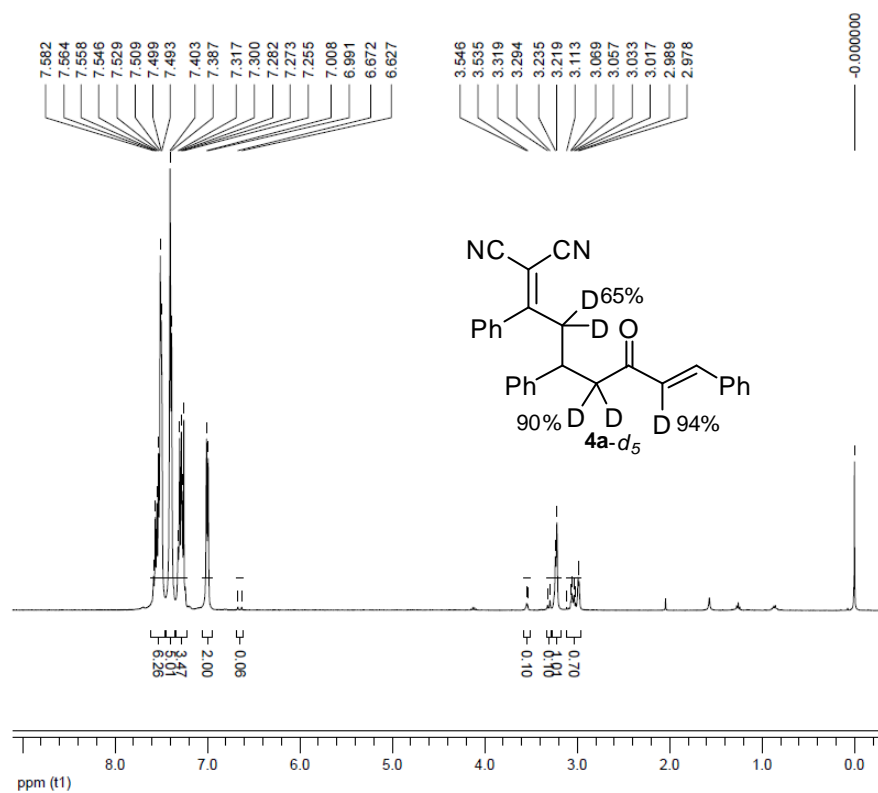

Date: 13 Sep 2011  
 Document's Title: n  
 Spectrum Title: PROTON  
 Frequency (MHz): (f1) 400.230  
 Original Points Count: (f1) 32768  
 Actual Points Count: (f1) 32768  
 Acquisition Time (sec): (f1) 3.9846  
 Spectral Width (ppm): (f1) 20.547  
 Pulse Program: Unknown

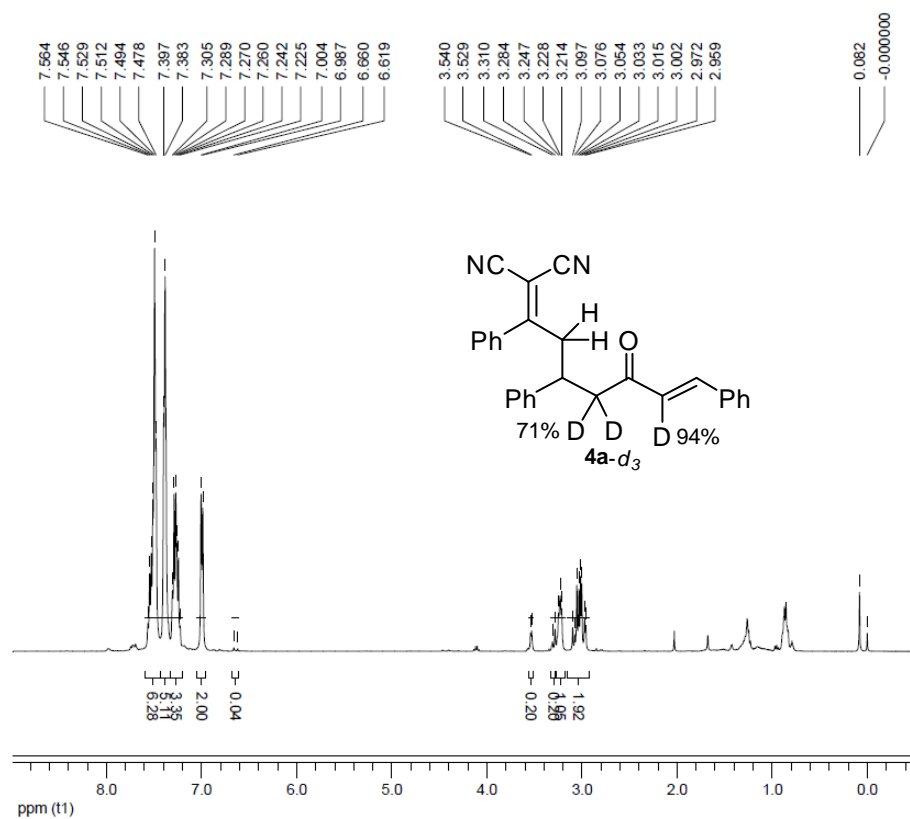

Date:  
6 Jul 2011  
Document's Title:  
PhSPHMechan-D2O

Spectrum Title:  
PROTON

Frequency (MHz):  
(f1) 400.230  
Original Points Count:  
(f1) 32768  
Actual Points Count:  
(f1) 32768  
Acquisition Time (sec):  
(f1) 3.9846  
Spectral Width (ppm):  
(f1) 20.547  
Pulse Program:  
Unknown

## II. ORTEP Drawings of (*trans, E*)-**3b** and **4b**

**Table 1. Crystal data and structure refinement for (*trans, E*)-**3b**.**

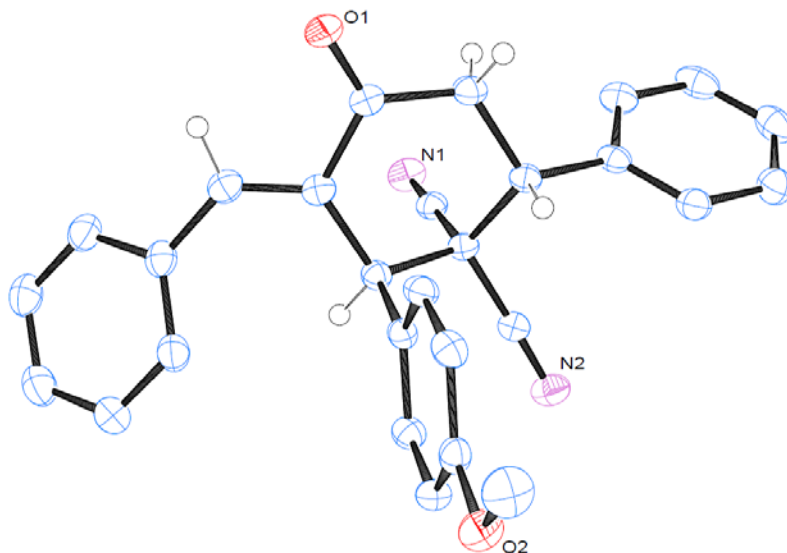

|                                   |                                                                                                         |
|-----------------------------------|---------------------------------------------------------------------------------------------------------|
| Identification code               | ( <i>trans, E</i> )- <b>3b</b>                                                                          |
| Empirical formula                 | C <sub>28</sub> H <sub>22</sub> N <sub>2</sub> O <sub>2</sub>                                           |
| Formula weight                    | 418.48                                                                                                  |
| Temperature                       | 113(2) K                                                                                                |
| Wavelength                        | 0.71075 Å                                                                                               |
| Crystal system, space group       | Monoclinic, P 1 21/c 1                                                                                  |
| Unit cell dimensions              | a = 11.0620(10) Å    α = 90°.<br>b = 16.7680(16) Å    β = 105.781(4)°.<br>c = 12.3210(13) Å    γ = 90°. |
| Volume                            | 2199.3(4) Å <sup>3</sup>                                                                                |
| Z, Calculated density             | 4, 1.264 Mg/m <sup>3</sup>                                                                              |
| Absorption coefficient            | 0.080 mm <sup>-1</sup>                                                                                  |
| F(000)                            | 880                                                                                                     |
| Crystal size                      | 0.22 x 0.20 x 0.18 mm <sup>3</sup>                                                                      |
| Theta range for data collection   | 1.91 to 27.90°                                                                                          |
| Limiting indices                  | -14 ≤ h ≤ 14, -21 ≤ k ≤ 22, -15 ≤ l ≤ 16                                                                |
| Reflections collected / unique    | 20943 / 5255 [R(int) = 0.0322]                                                                          |
| Completeness to the θ = 27.90°    | 99.8 %                                                                                                  |
| Absorption correction             | Semi-empirical from equivalents                                                                         |
| Max. and min. transmission        | 0.9857 and 0.9826                                                                                       |
| Refinement method                 | Full-matrix least-squares on F <sup>2</sup>                                                             |
| Data / restraints / parameters    | 5255 / 0 / 290                                                                                          |
| Goodness-of-fit on F <sup>2</sup> | 0.995                                                                                                   |
| Final R indices [I > 2σ(I)]       | R1 = 0.0381, wR2 = 0.0889                                                                               |
| R indices (all data)              | R1 = 0.0524, wR2 = 0.0958                                                                               |
| Largest diff. peak and hole       | 0.254 and -0.145 e. Å <sup>-3</sup>                                                                     |

**Table 2. Crystal data and structure refinement for 4b.**

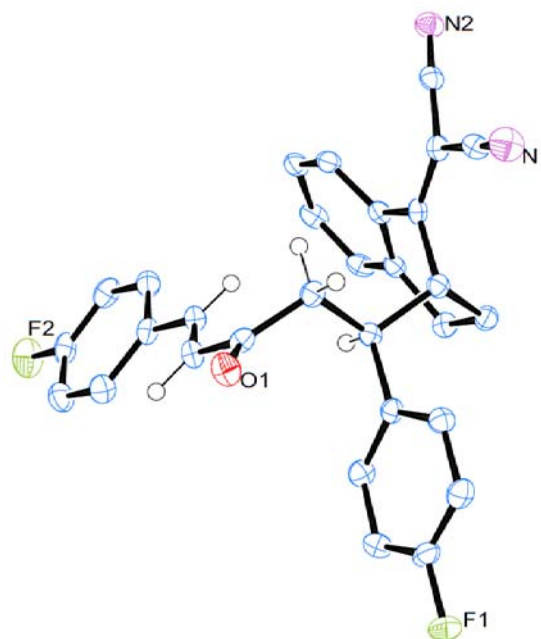

|                                   |                                                                                                        |
|-----------------------------------|--------------------------------------------------------------------------------------------------------|
| Identification code               | <b>4b</b>                                                                                              |
| Empirical formula                 | C <sub>30</sub> H <sub>22</sub> F <sub>2</sub> N <sub>2</sub> O                                        |
| Formula weight                    | 464.50                                                                                                 |
| Temperature                       | 113(2) K                                                                                               |
| Wavelength                        | 0.71073 Å                                                                                              |
| Crystal system, space group       | Monoclinic, Cc                                                                                         |
| Unit cell dimensions              | a = 12.828(2) Å    α = 90°.<br>b = 11.141(2) Å    β = 103.208(10) (4)°.<br>c = 16.665(3) Å    γ = 90°. |
| Volume                            | 2318.7(7) Å <sup>3</sup>                                                                               |
| Z, Calculated density             | 4, 1.331 Mg/m <sup>3</sup>                                                                             |
| Absorption coefficient            | 0.092 mm <sup>-1</sup>                                                                                 |
| F(000)                            | 968                                                                                                    |
| Crystal size                      | 0.20 x 0.18 x 0.12 mm <sup>3</sup>                                                                     |
| Theta range for data collection   | 2.45 to 27.87°                                                                                         |
| Limiting indices                  | -13 ≤ h ≤ 16, -14 ≤ k ≤ 13, -21 ≤ l ≤ 21                                                               |
| Reflections collected / unique    | 11067 / 4433 [R(int) = 0.0302]                                                                         |
| Completeness to the θ = 27.87°    | 99.8 %                                                                                                 |
| Absorption correction             | Semi-empirical from equivalents                                                                        |
| Max. and min. transmission        | 0.9890 and 0.9818                                                                                      |
| Refinement method                 | Full-matrix least-squares on F <sup>2</sup>                                                            |
| Data / restraints / parameters    | 4433 / 2 / 316                                                                                         |
| Goodness-of-fit on F <sup>2</sup> | 1.043                                                                                                  |
| Final R indices [I > 2σ(I)]       | R1 = 0.0285, wR2 = 0.0599                                                                              |
| R indices (all data)              | R1 = 0.0332, wR2 = 0.0606                                                                              |
| Largest diff. peak and hole       | 0.221 and -0.127 e. Å <sup>-3</sup>                                                                    |

### III. $^1\text{H}$ and $^{13}\text{C}$ NMR Spectra of 3, 4, 5 and 6

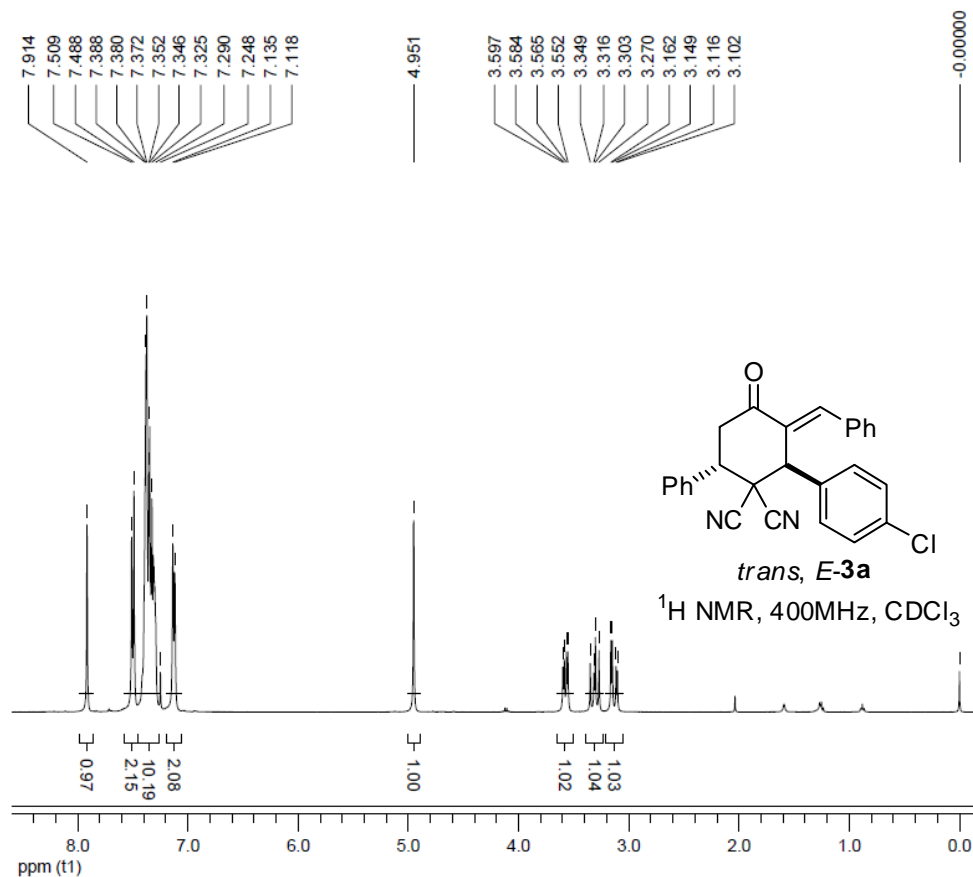

Date:  
3 Jul 2011  
Document's Title:  
N  
Spectrum Title:  
PROTON  
Frequency (MHz):  
(f1) 400.130  
Original Points Count:  
(f1) 32768  
Actual Points Count:  
(f1) 32768  
Acquisition Time (sec):  
(f1) 3.9846  
Spectral Width (ppm):  
(f1) 20.553  
Pulse Program:  
Unknown



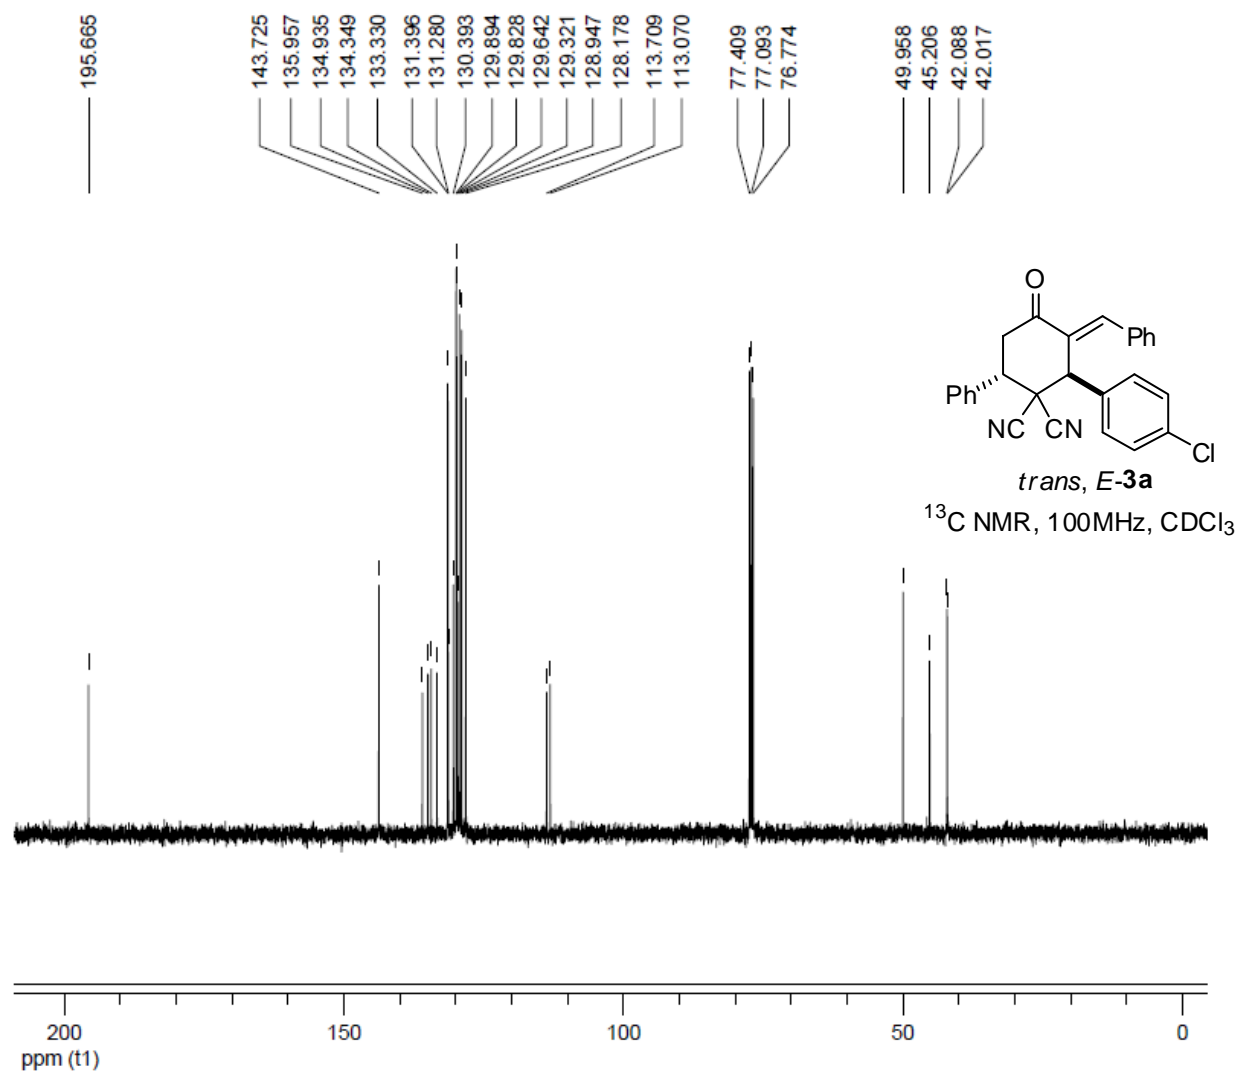

Date:

3 Jul 2011

Document's Title:

nc

Spectrum Title:

C13CPD

Frequency (MHz):

(f1) 100.613

Original Points Count:

(f1) 32768

Actual Points Count:

(f1) 32768

Acquisition Time (sec):

(f1) 0.9175

Spectral Width (ppm):

(f1) 354.968

Pulse Program:

Unknown

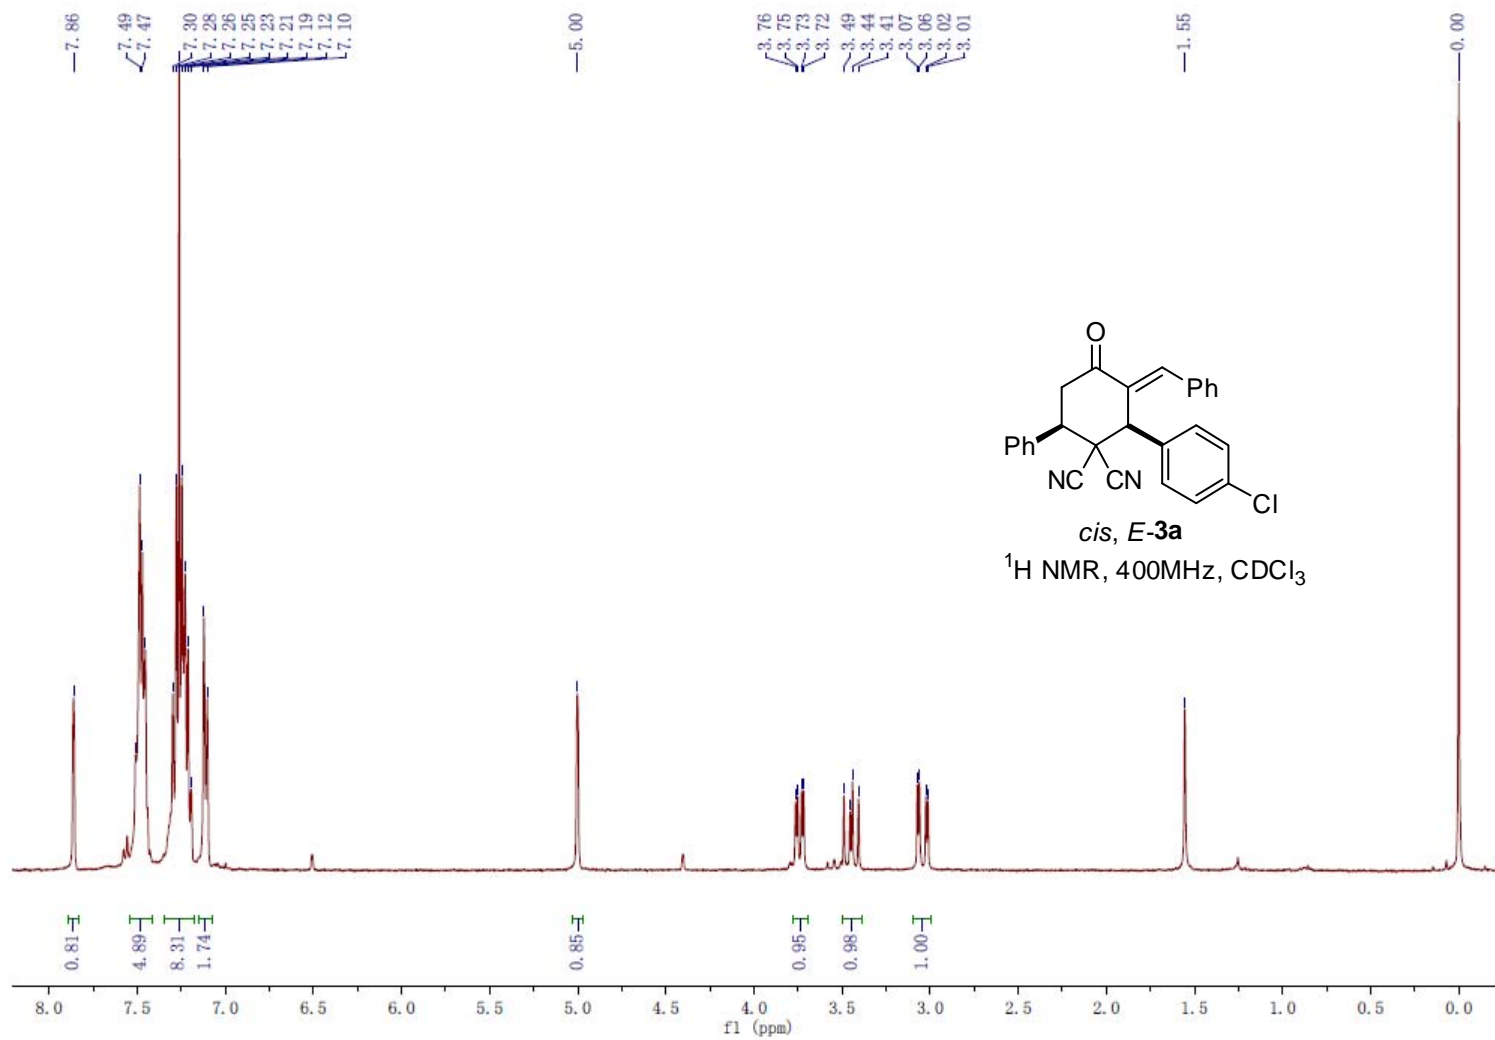

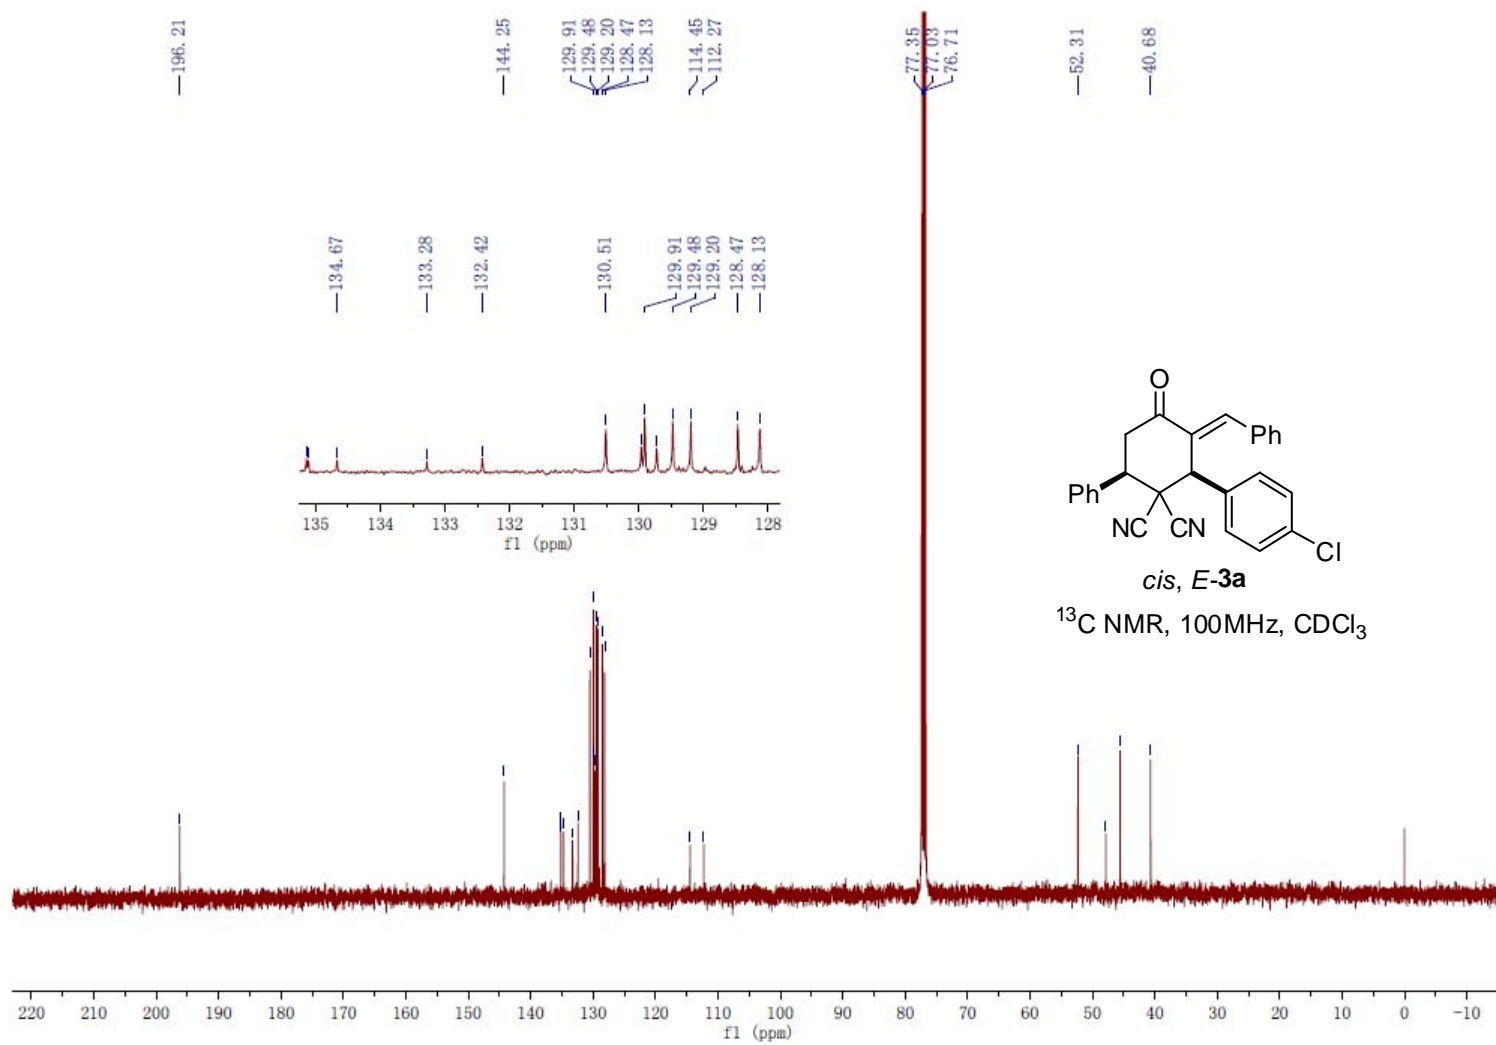

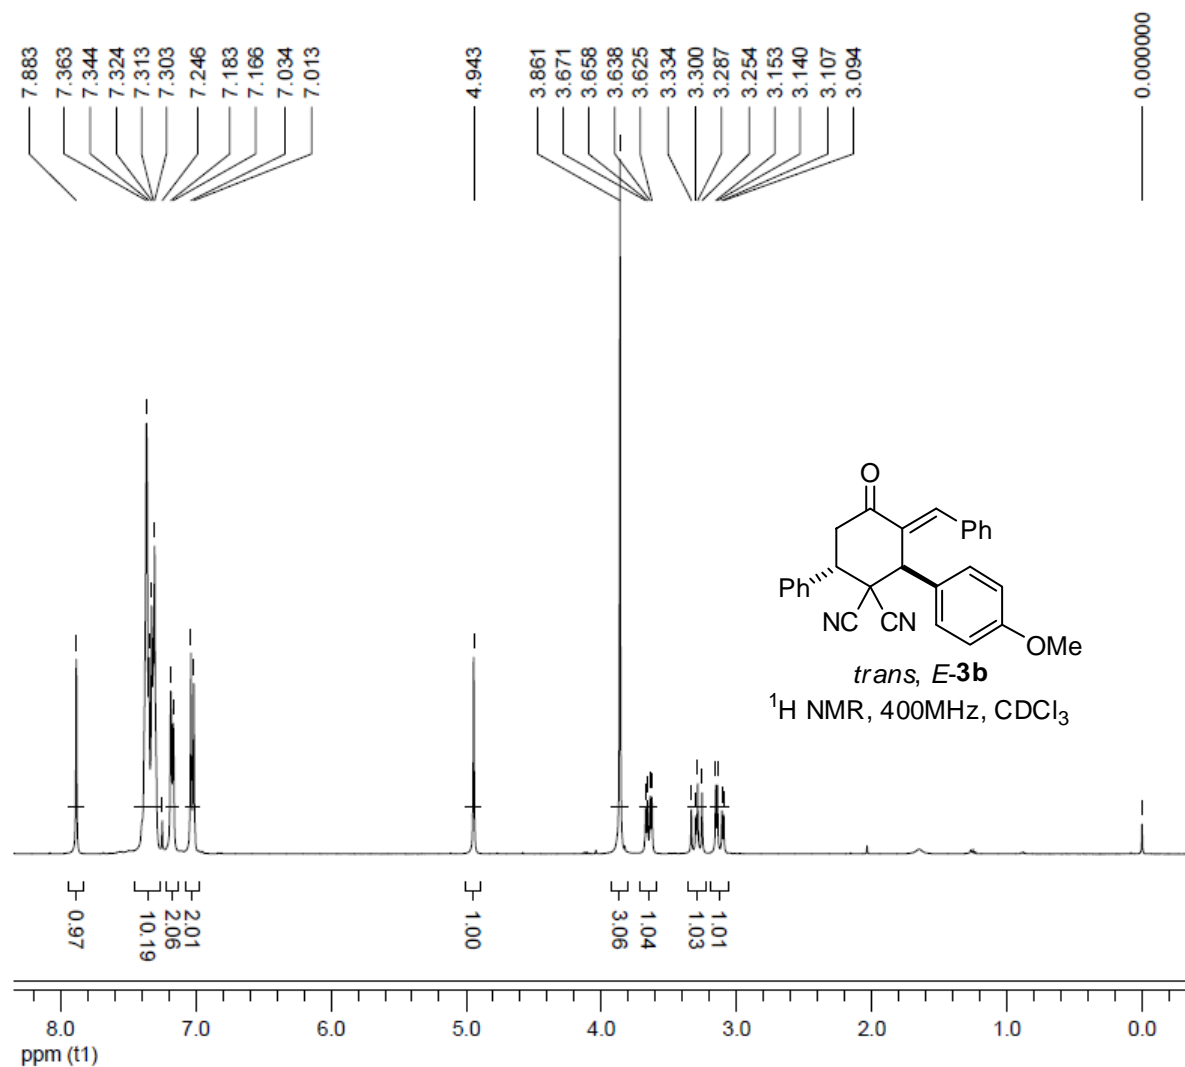

Date:  
3 Jul 2011  
Document's Title:  
nb  
Spectrum Title:  
PROTON  
Frequency (MHz):  
(f1) 400.130  
Original Points Count:  
(f1) 32768  
Actual Points Count:  
(f1) 32768  
Acquisition Time (sec):  
(f1) 3.9846  
Spectral Width (ppm):  
(f1) 20.553  
Pulse Program:  
Unknown

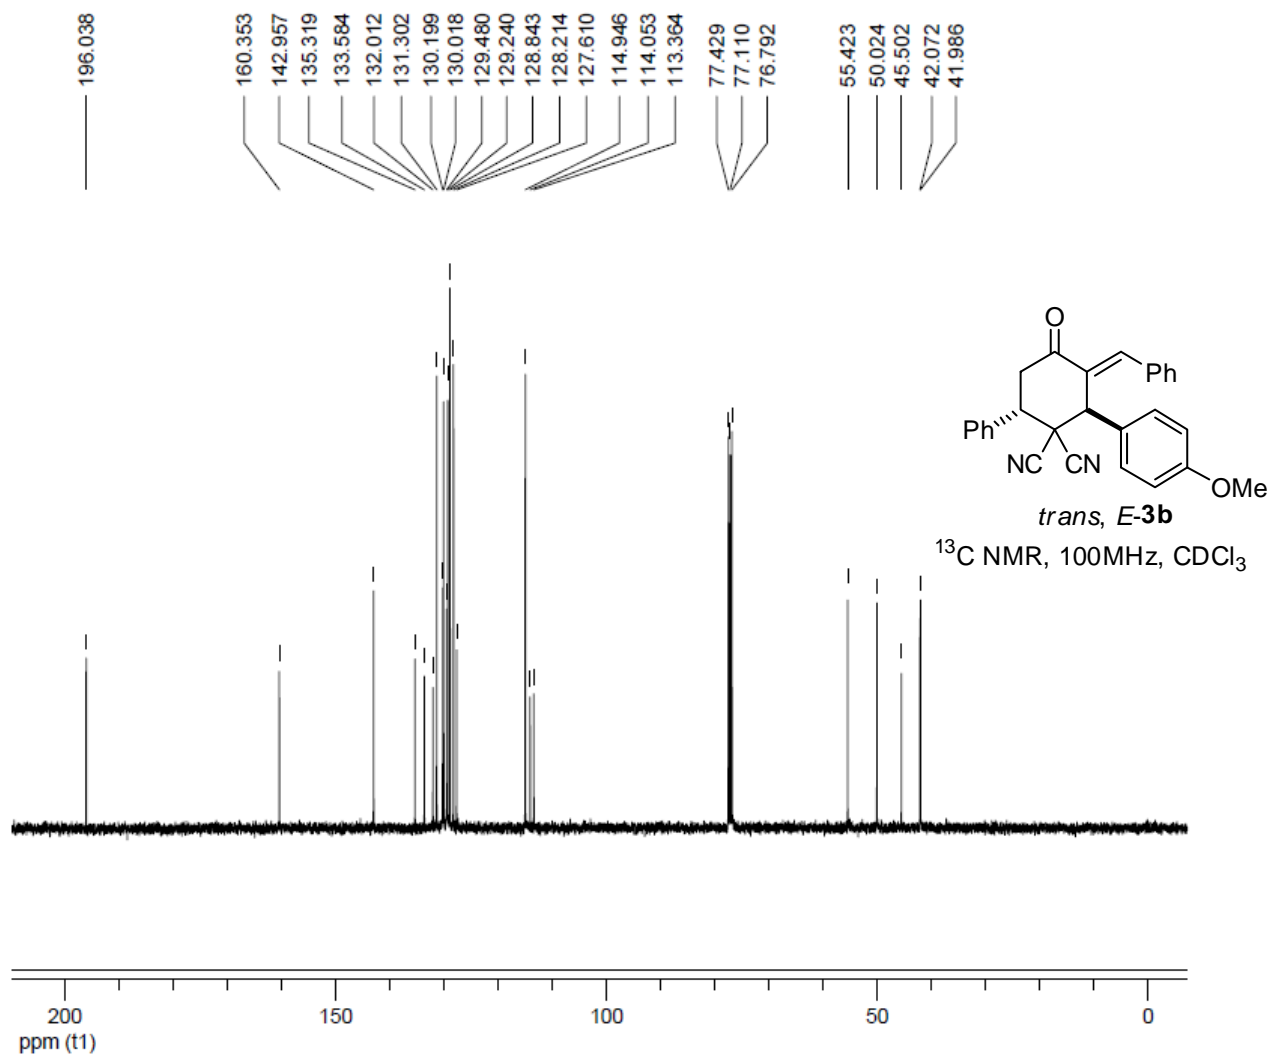

Date:

3 Jul 2011

Document's Title:

nbc

Spectrum Title:

C13CPD

Frequency (MHz):

(f1) 100.613

Original Points Count:

(f1) 32768

Actual Points Count:

(f1) 32768

Acquisition Time (sec):

(f1) 0.9175

Spectral Width (ppm):

(f1) 354.968

Pulse Program:

Unknown

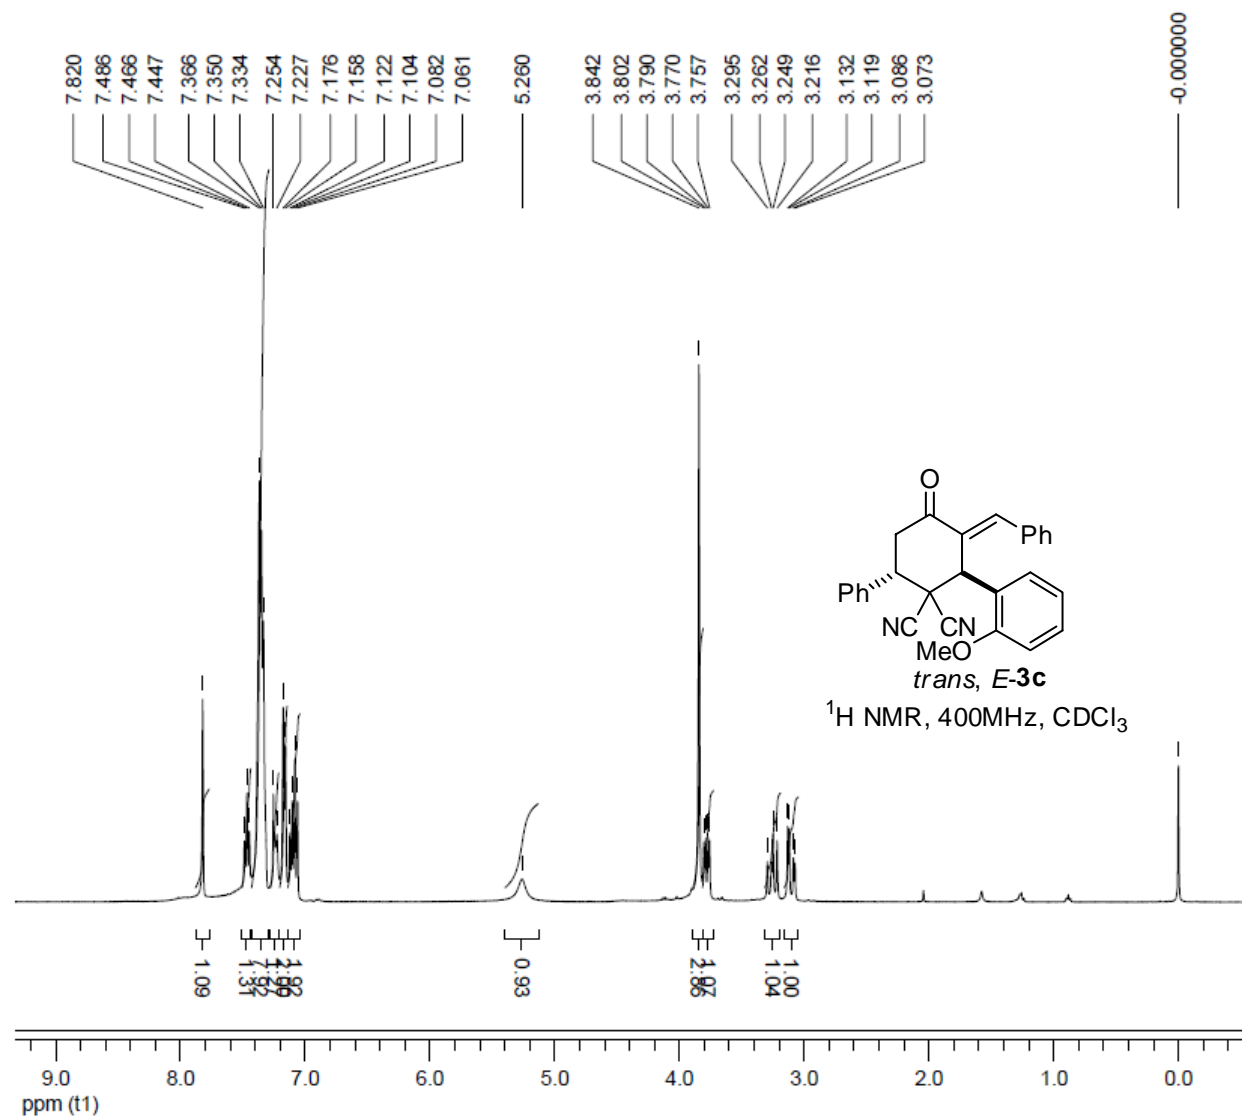

Date:  
3 Jul 2011  
Document's Title:  
1r

Spectrum Title:  
PROTON

Frequency (MHz):  
(f1) 400.230  
Original Points Count:  
(f1) 32768  
Actual Points Count:  
(f1) 32768  
Acquisition Time (sec):  
(f1) 3.9846  
Spectral Width (ppm):  
(f1) 20.547  
Pulse Program:  
Unknown

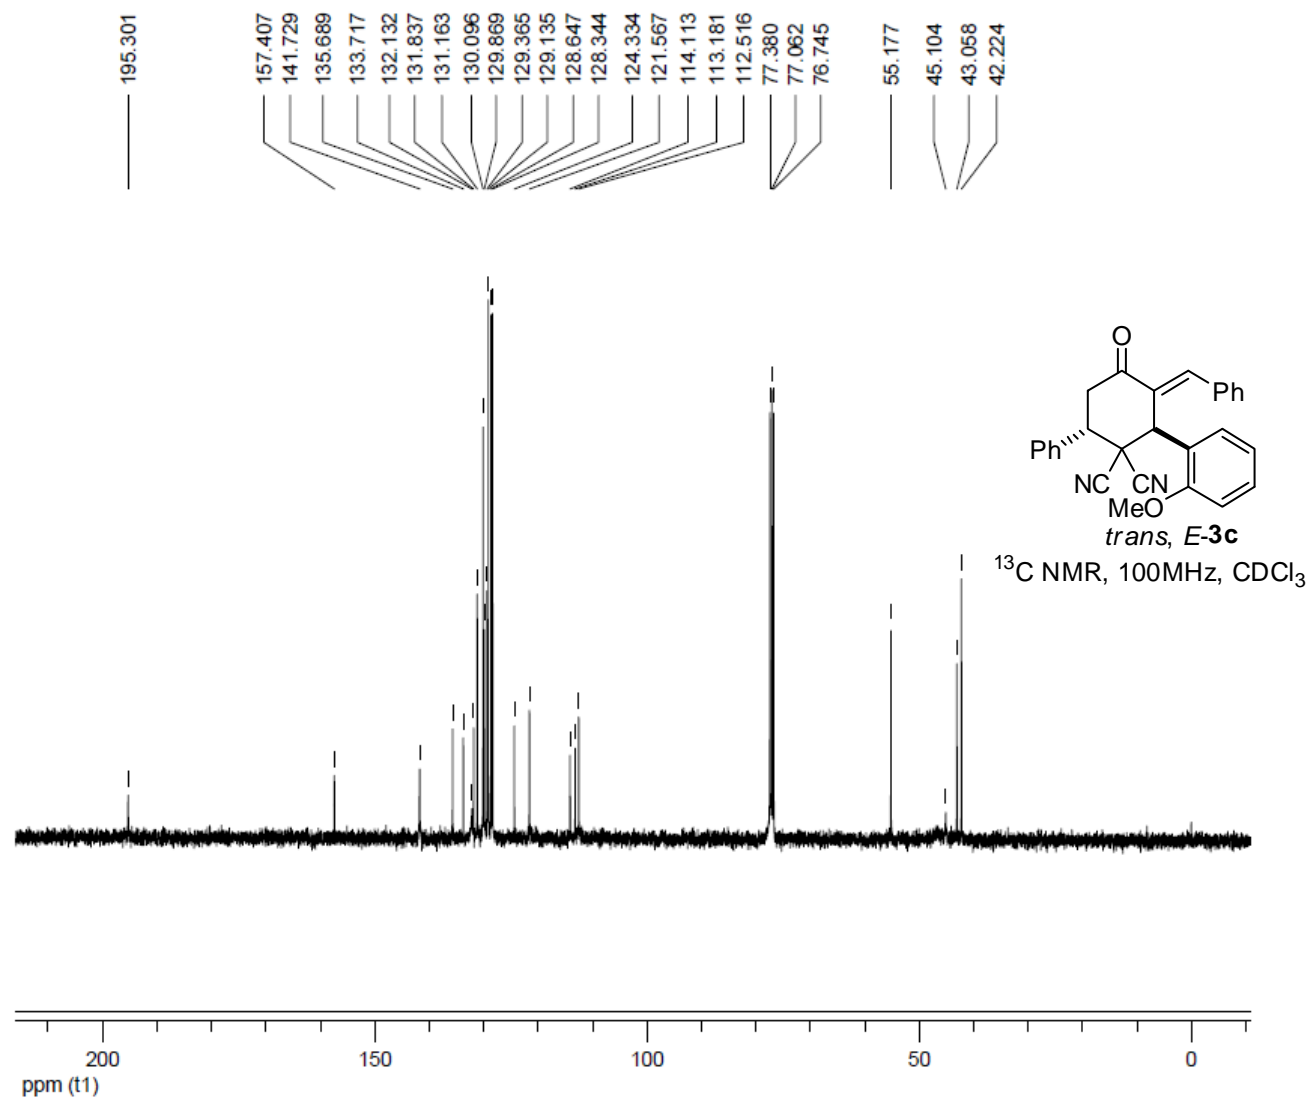

Date:  
3 Jul 2011  
Document's Title:  
1r

Spectrum Title:  
C13CPD

Frequency (MHz):  
(f1) 100.613  
Original Points Count:  
(f1) 32768  
Actual Points Count:  
(f1) 32768  
Acquisition Time (sec):  
(f1) 0.9175  
Spectral Width (ppm):  
(f1) 354.968  
Pulse Program:  
Unknown

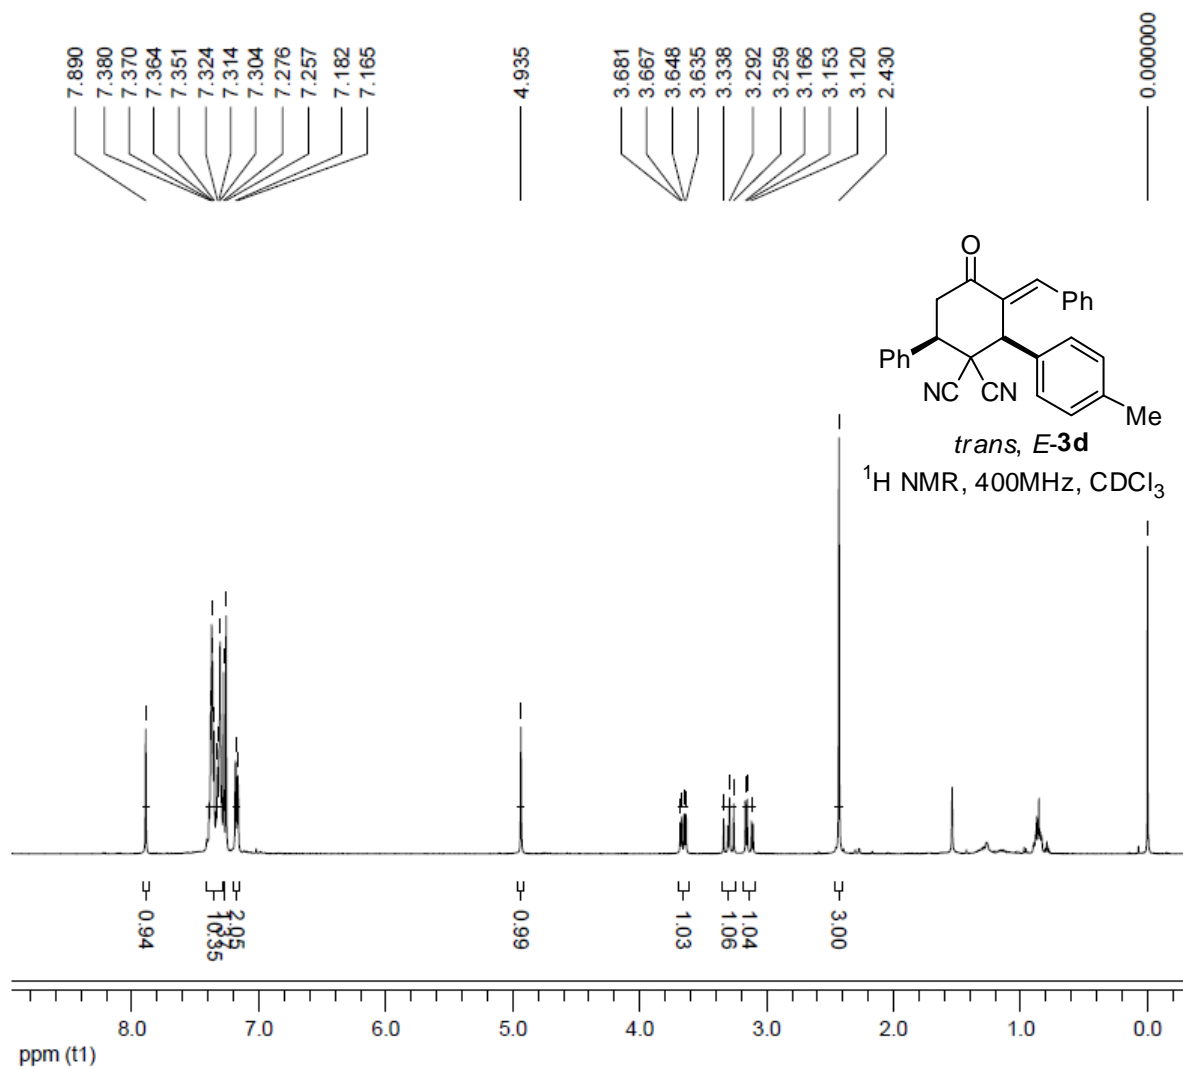

Date:

3 Jul 2011

Document's Title:

n3d

Spectrum Title:

PROTON

Frequency (MHz):

(f1) 400.130

Original Points Count:

(f1) 32768

Actual Points Count:

(f1) 32768

Acquisition Time (sec):

(f1) 3.9846

Spectral Width (ppm):

(f1) 20.553

Pulse Program:

Unknown



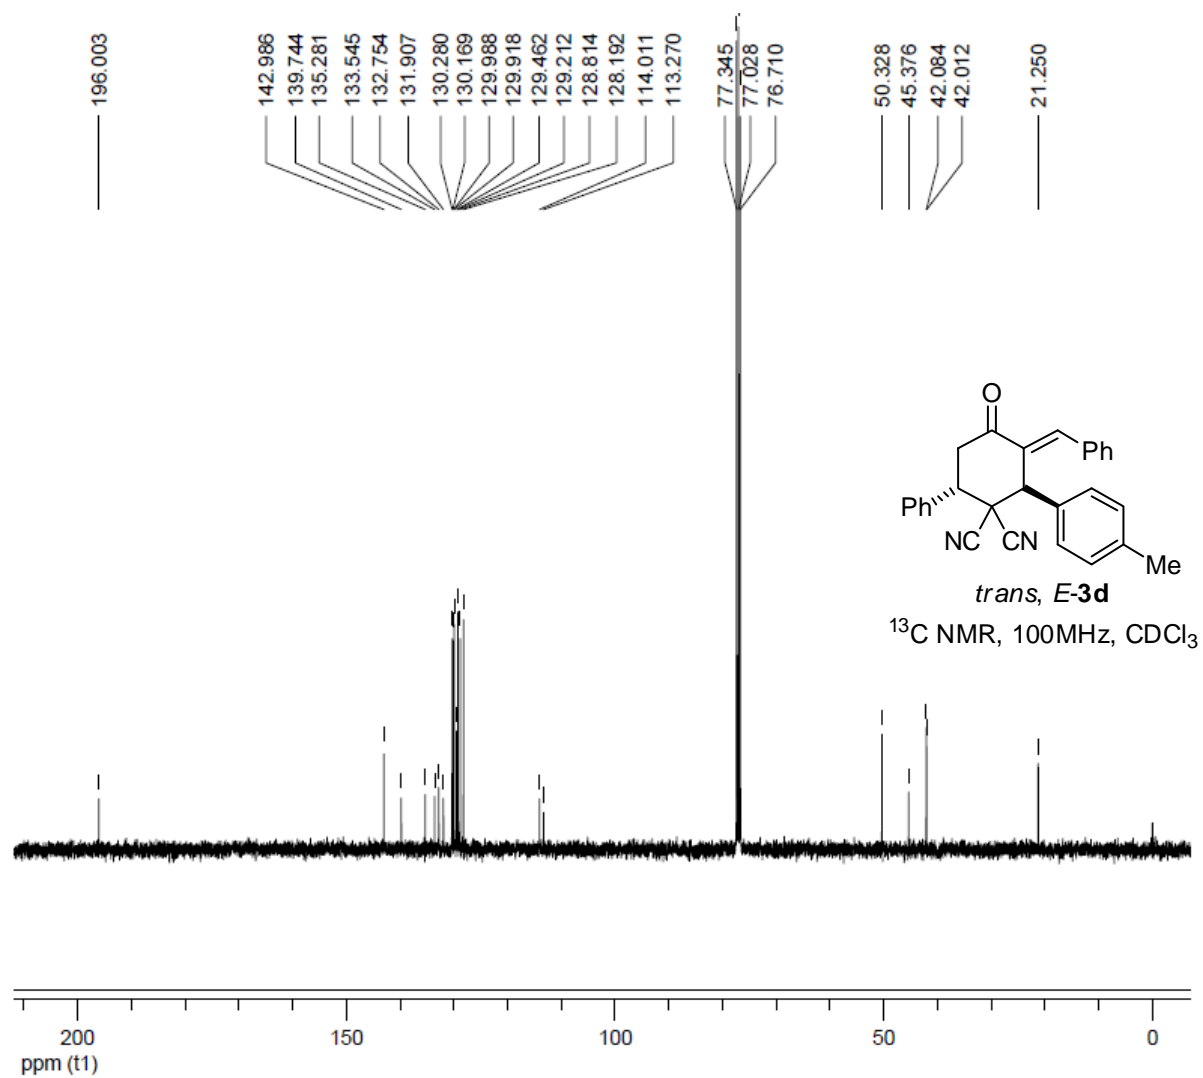

Date:

3 Jul 2011

Document's Title:

nc

Spectrum Title:

C13CPD

Frequency (MHz):

(f1) 100.613

Original Points Count:

(f1) 32768

Actual Points Count:

(f1) 32768

Acquisition Time (sec):

(f1) 0.9175

Spectral Width (ppm):

(f1) 354.968

Pulse Program:

Unknown

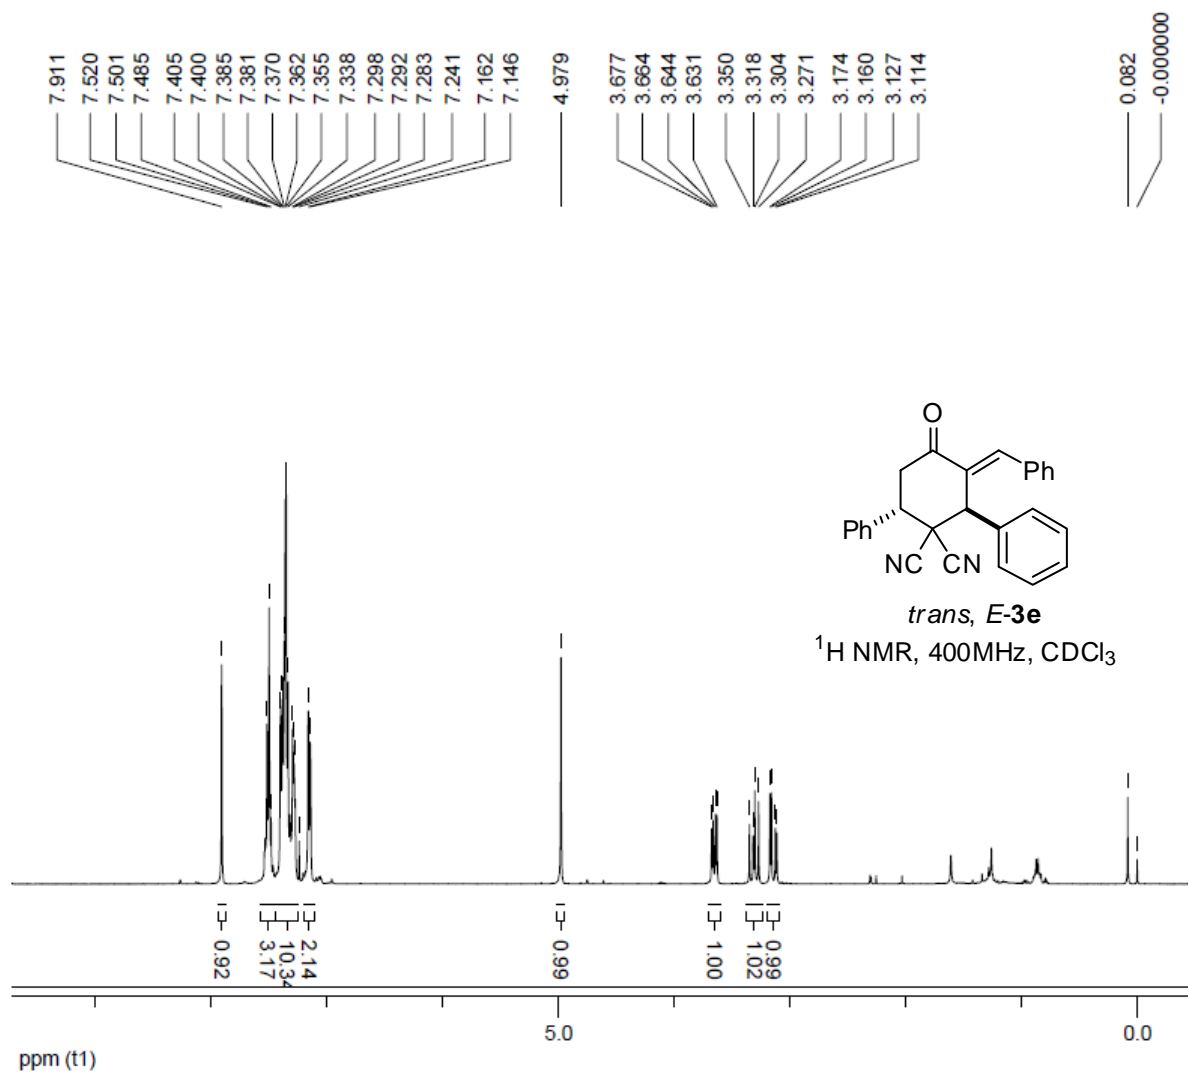

Date:

5 Jul 2011

Document's Title:

n

Spectrum Title:

PROTON

Frequency (MHz):

(f1) 400.130

Original Points Count:

(f1) 32768

Actual Points Count:

(f1) 32768

Acquisition Time (sec):

(f1) 3.9846

Spectral Width (ppm):

(f1) 20.553

Pulse Program:

Unknown

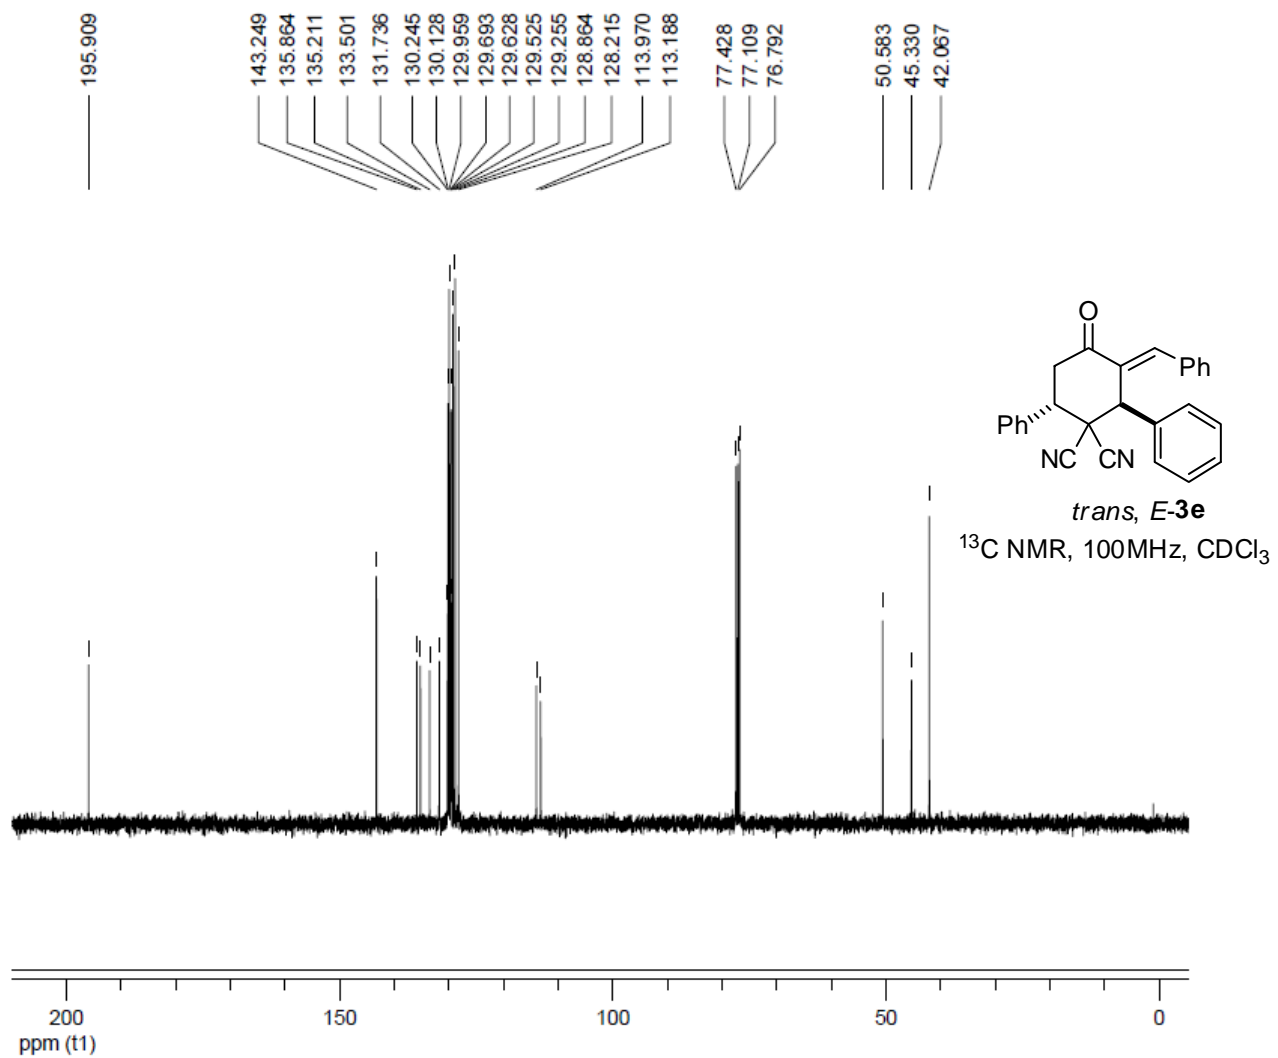

Date:

5 Jul 2011

Document's Title:

nc

Spectrum Title:

C13CPD

Frequency (MHz):

(f1) 100.613

Original Points Count:

(f1) 32768

Actual Points Count:

(f1) 32768

Acquisition Time (sec):

(f1) 0.9175

Spectral Width (ppm):

(f1) 354.968

Pulse Program:

Unknown

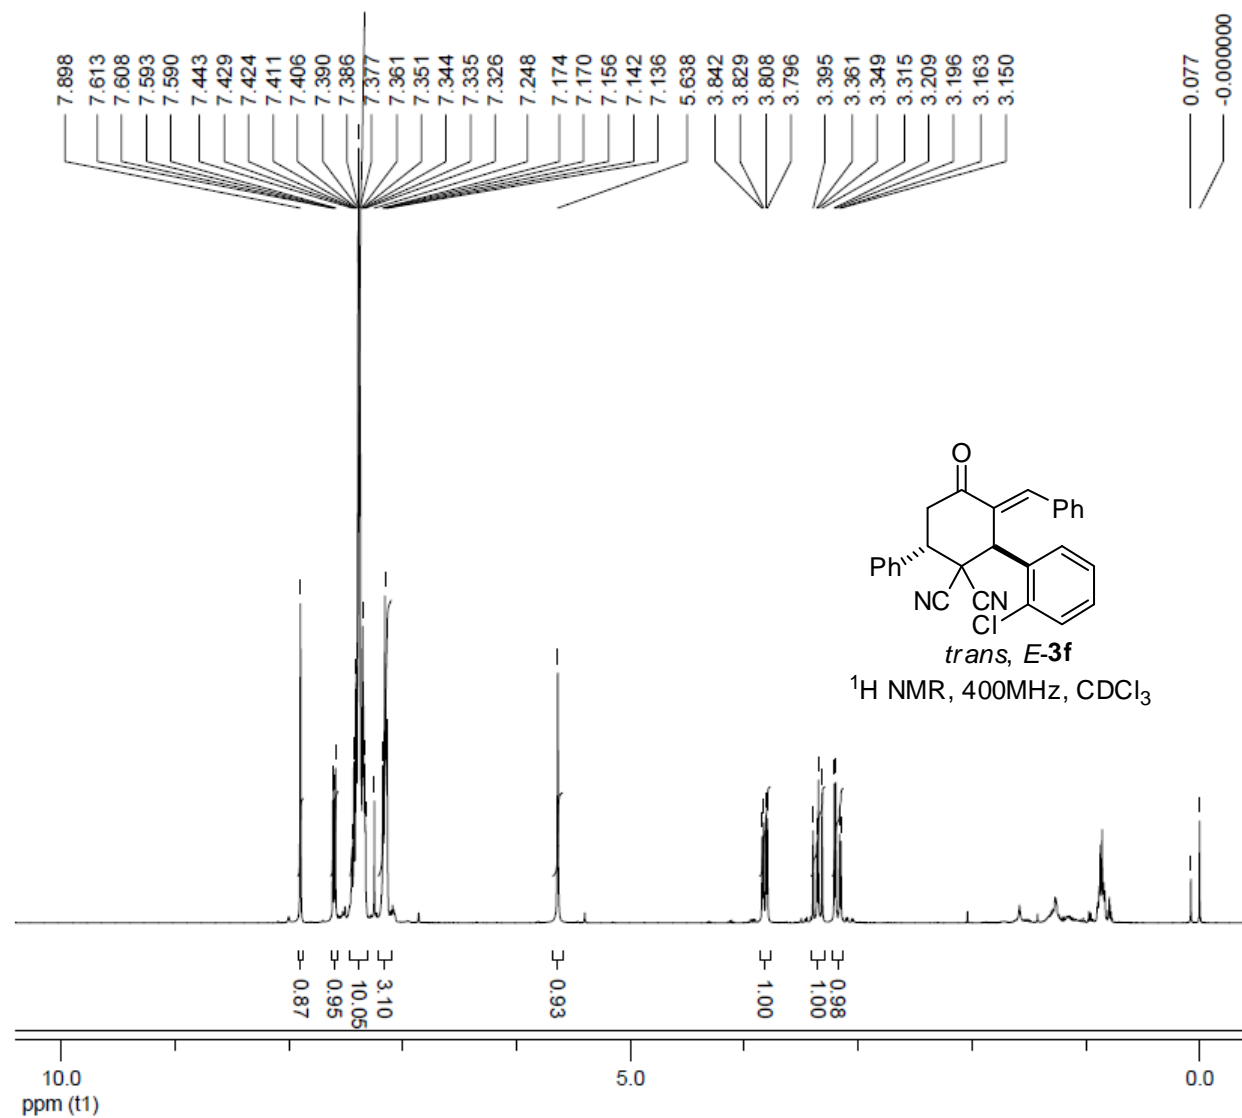

Date:  
5 Jul 2011  
Document's Title:  
1r  
Spectrum Title:  
PROTON  
Frequency (MHz):  
(f1) 400.130  
Original Points Count:  
(f1) 32768  
Actual Points Count:  
(f1) 32768  
Acquisition Time (sec):  
(f1) 3.9846  
Spectral Width (ppm):  
(f1) 20.553  
Pulse Program:  
Unknown

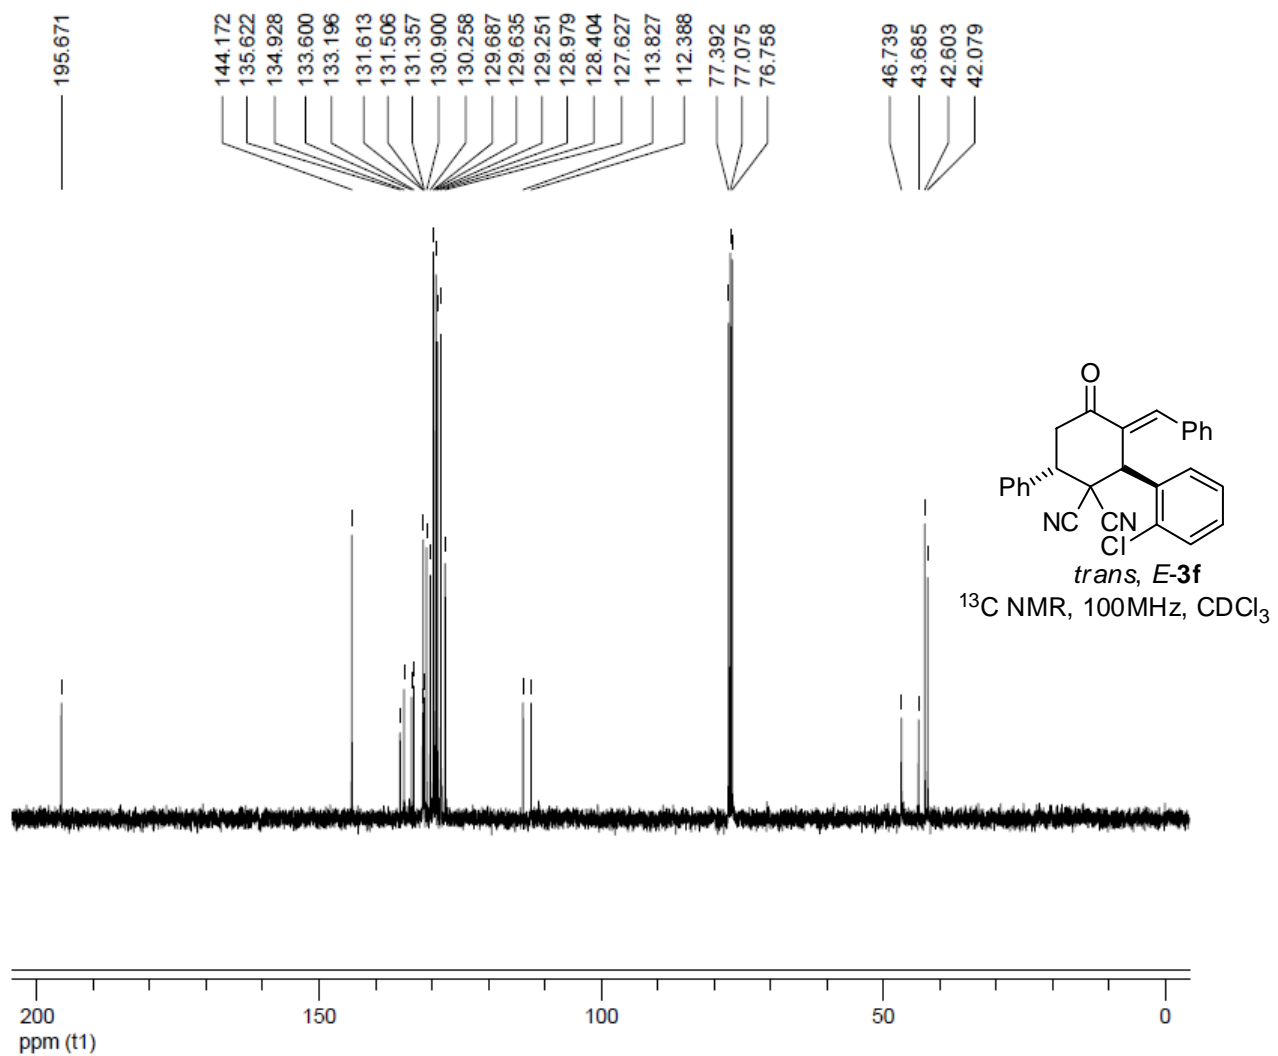

Date:

5 Jul 2011

Document's Title:

nc

Spectrum Title:

C13CPD

Frequency (MHz):

(f1) 100.613

Original Points Count:

(f1) 32768

Actual Points Count:

(f1) 32768

Acquisition Time (sec):

(f1) 0.9175

Spectral Width (ppm):

(f1) 354.968

Pulse Program:

Unknown

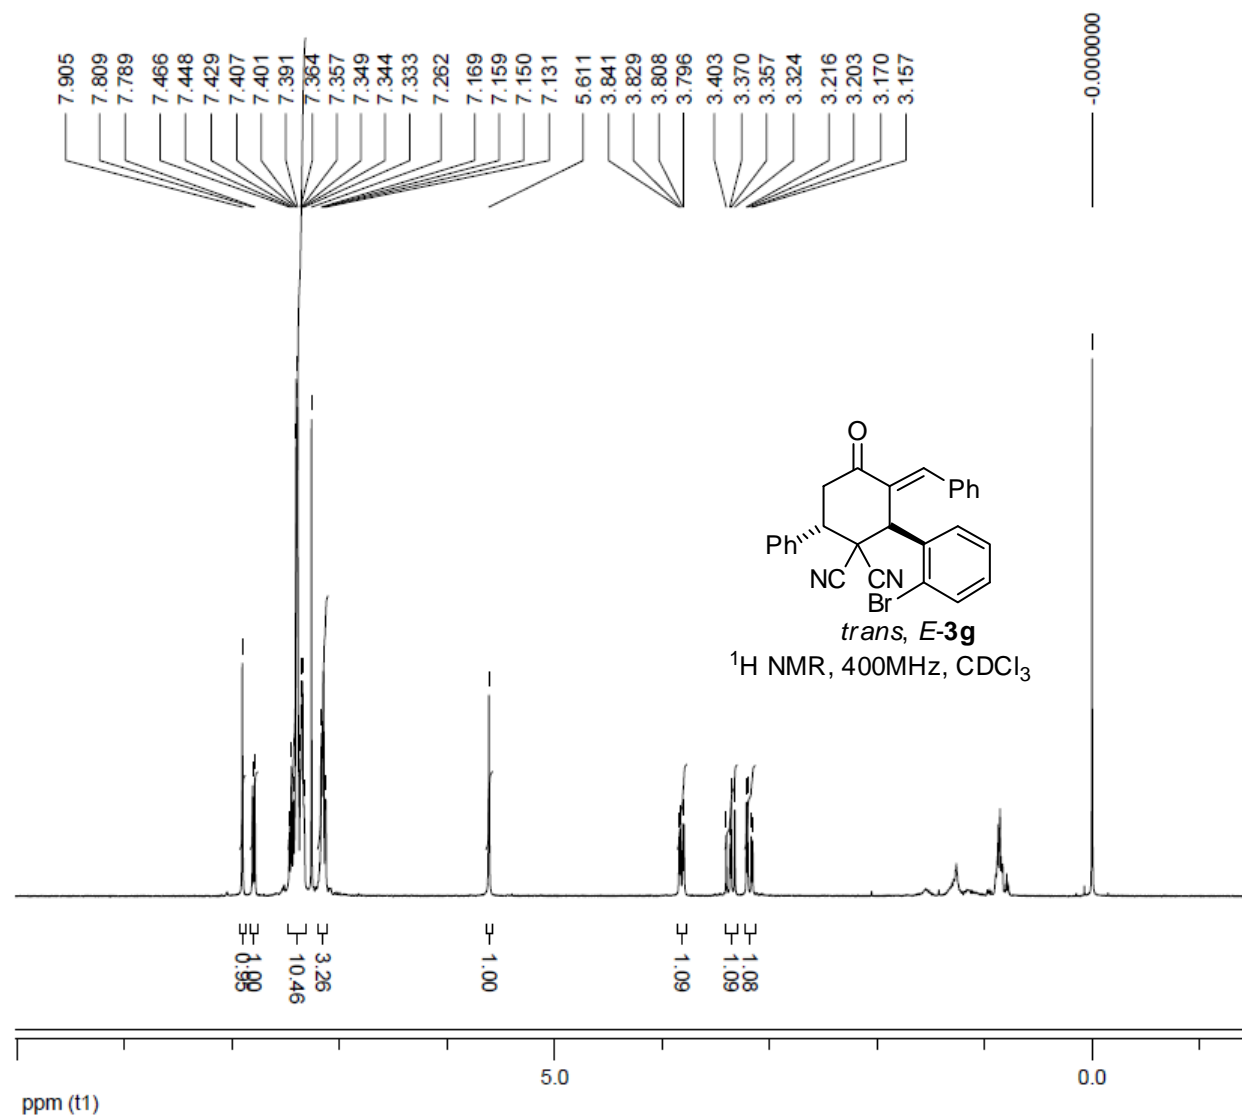

Date:  
5 Jul 2011  
Document's Title:  
n  
Spectrum Title:  
PROTON  
Frequency (MHz):  
(f1) 400.130  
Original Points Count:  
(f1) 32768  
Actual Points Count:  
(f1) 32768  
Acquisition Time (sec):  
(f1) 3.9846  
Spectral Width (ppm):  
(f1) 20.553  
Pulse Program:  
Unknown

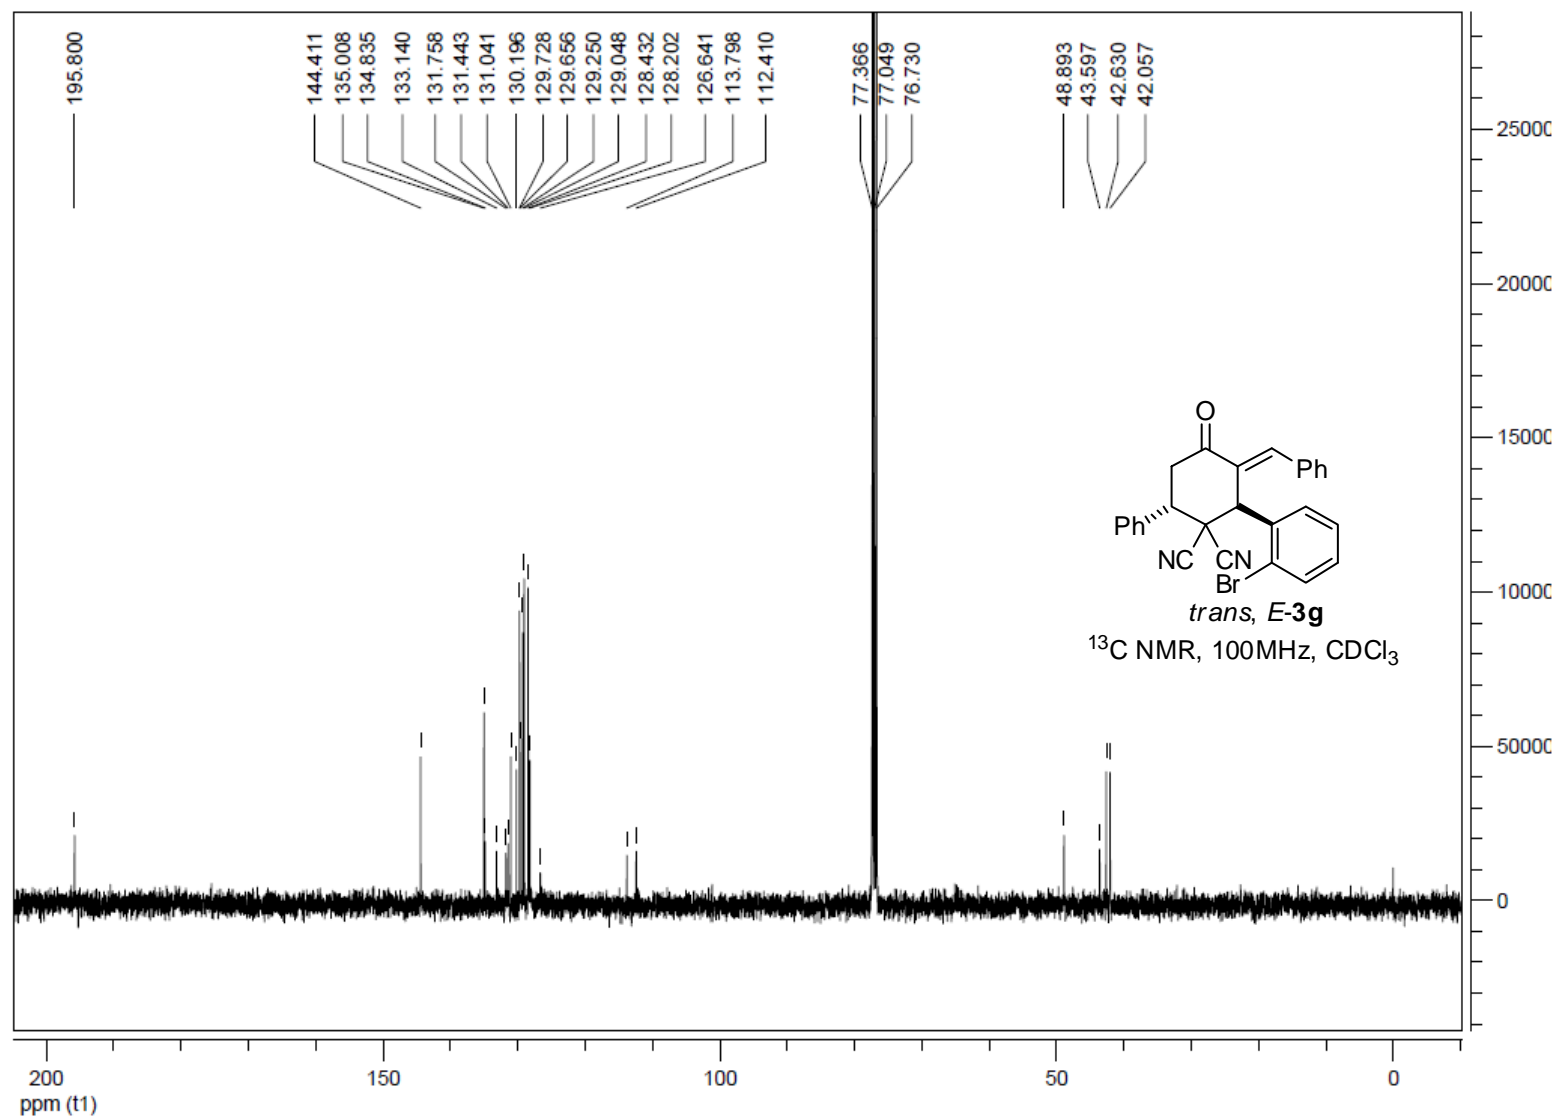

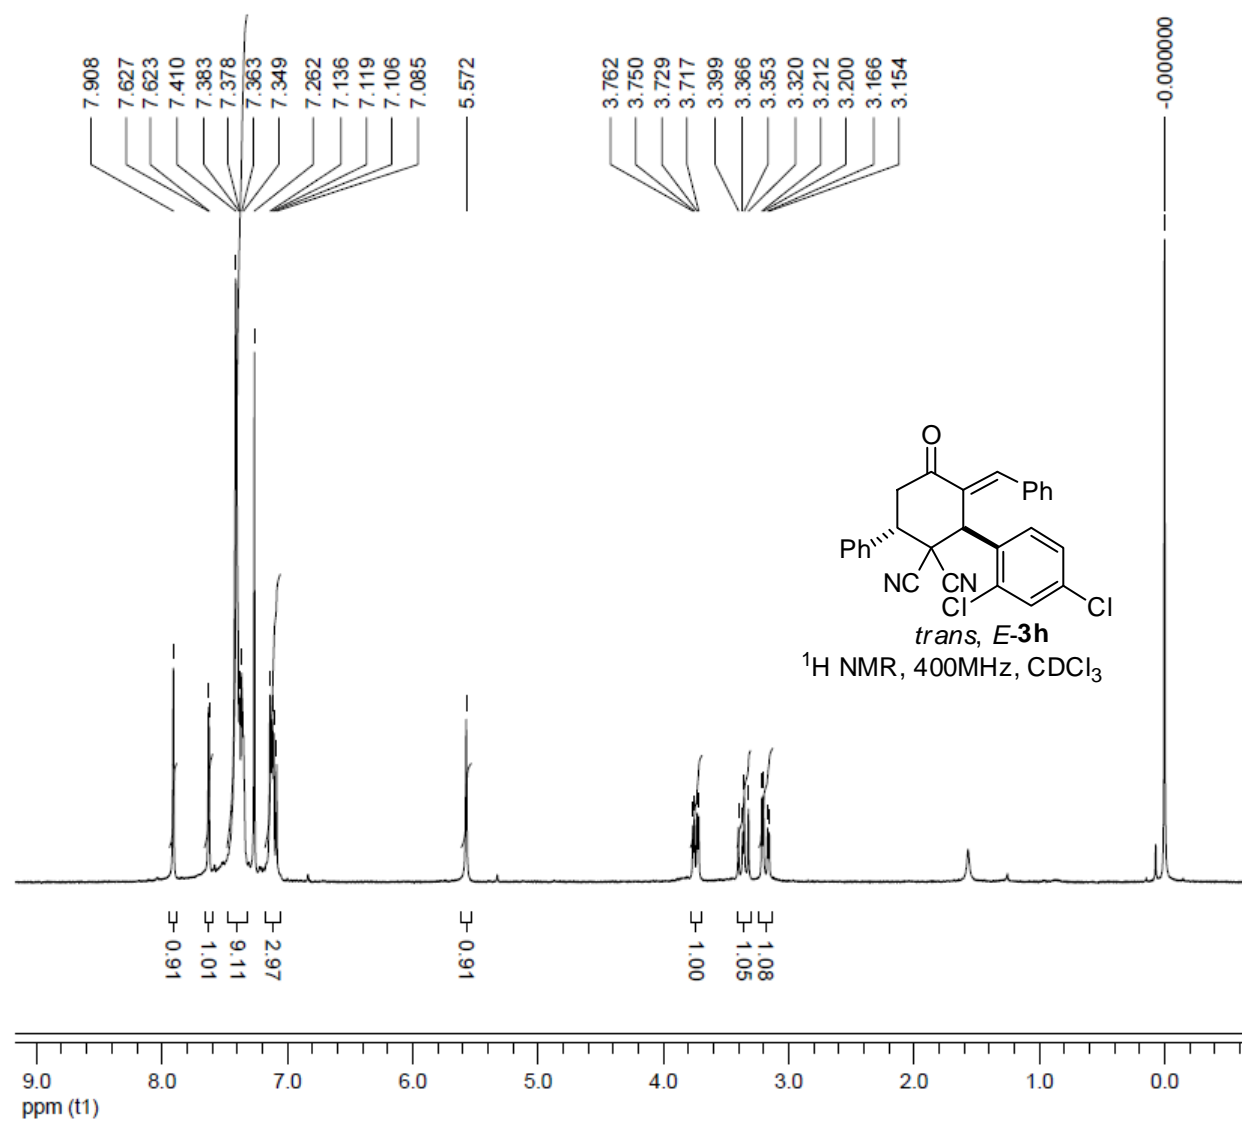

Date:  
5 Jul 2011  
Document's Title:  
n  
Spectrum Title:  
PROTON  
Frequency (MHz):  
(f1) 400.130  
Original Points Count:  
(f1) 32768  
Actual Points Count:  
(f1) 32768  
Acquisition Time (sec):  
(f1) 3.9846  
Spectral Width (ppm):  
(f1) 20.553  
Pulse Program:  
Unknown



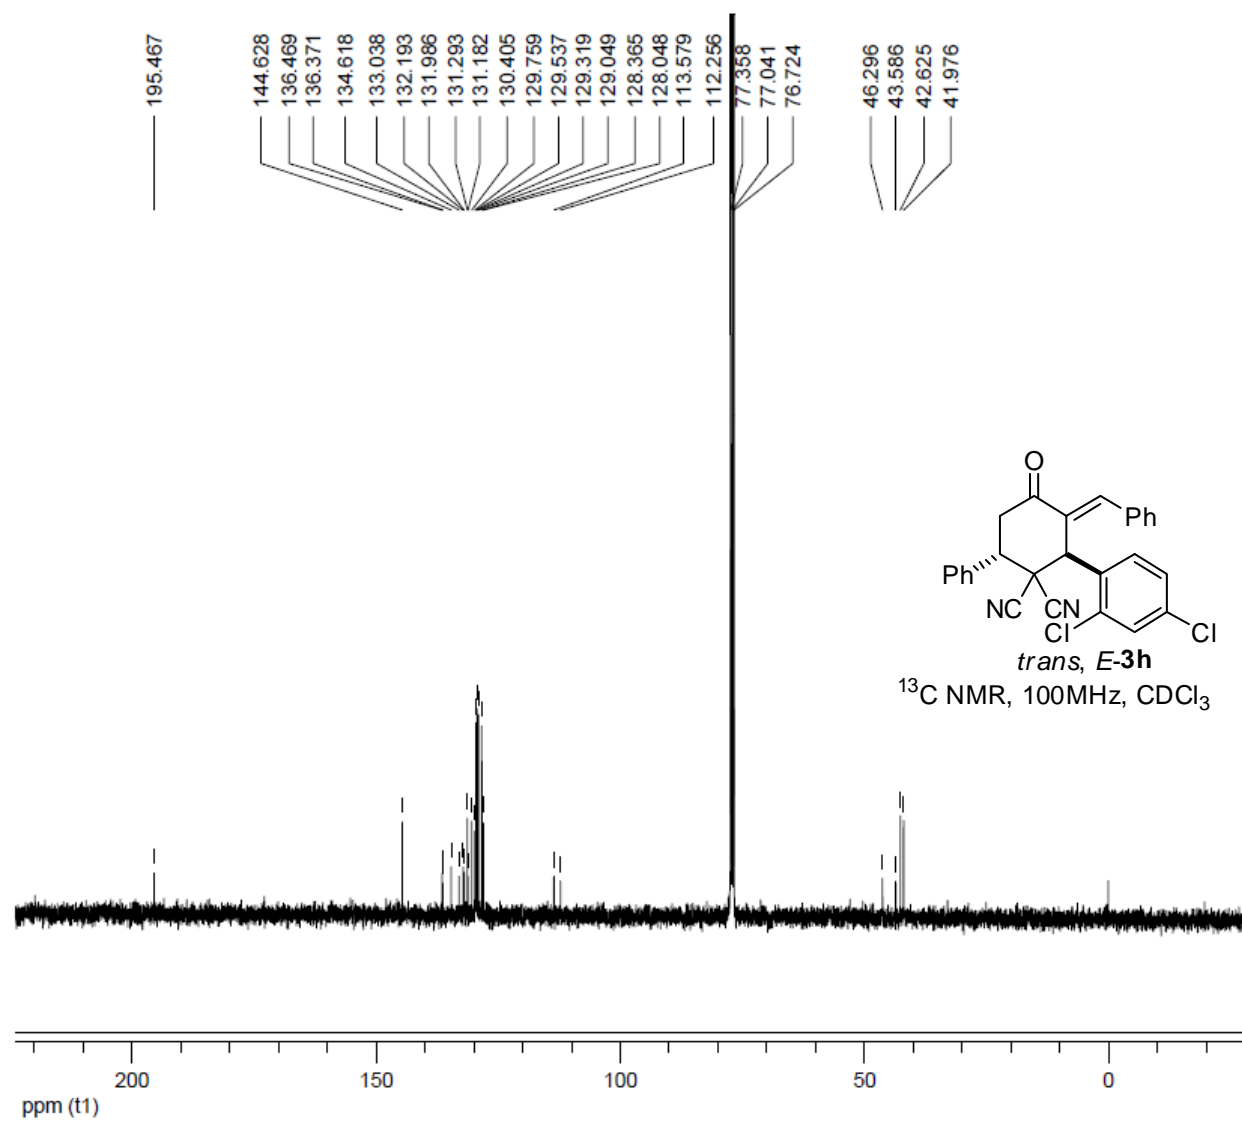

Date:  
5 Jul 2011  
Document's Title:  
nc

Spectrum Title:  
C13CPD

Frequency (MHz):  
(f1) 100.613  
Original Points Count:  
(f1) 32768  
Actual Points Count:  
(f1) 32768  
Acquisition Time (sec):  
(f1) 0.9175  
Spectral Width (ppm):  
(f1) 354.968  
Pulse Program:  
Unknown

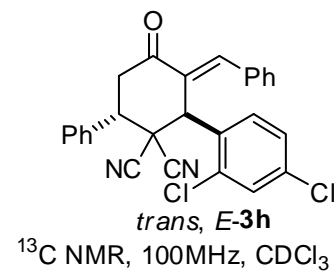

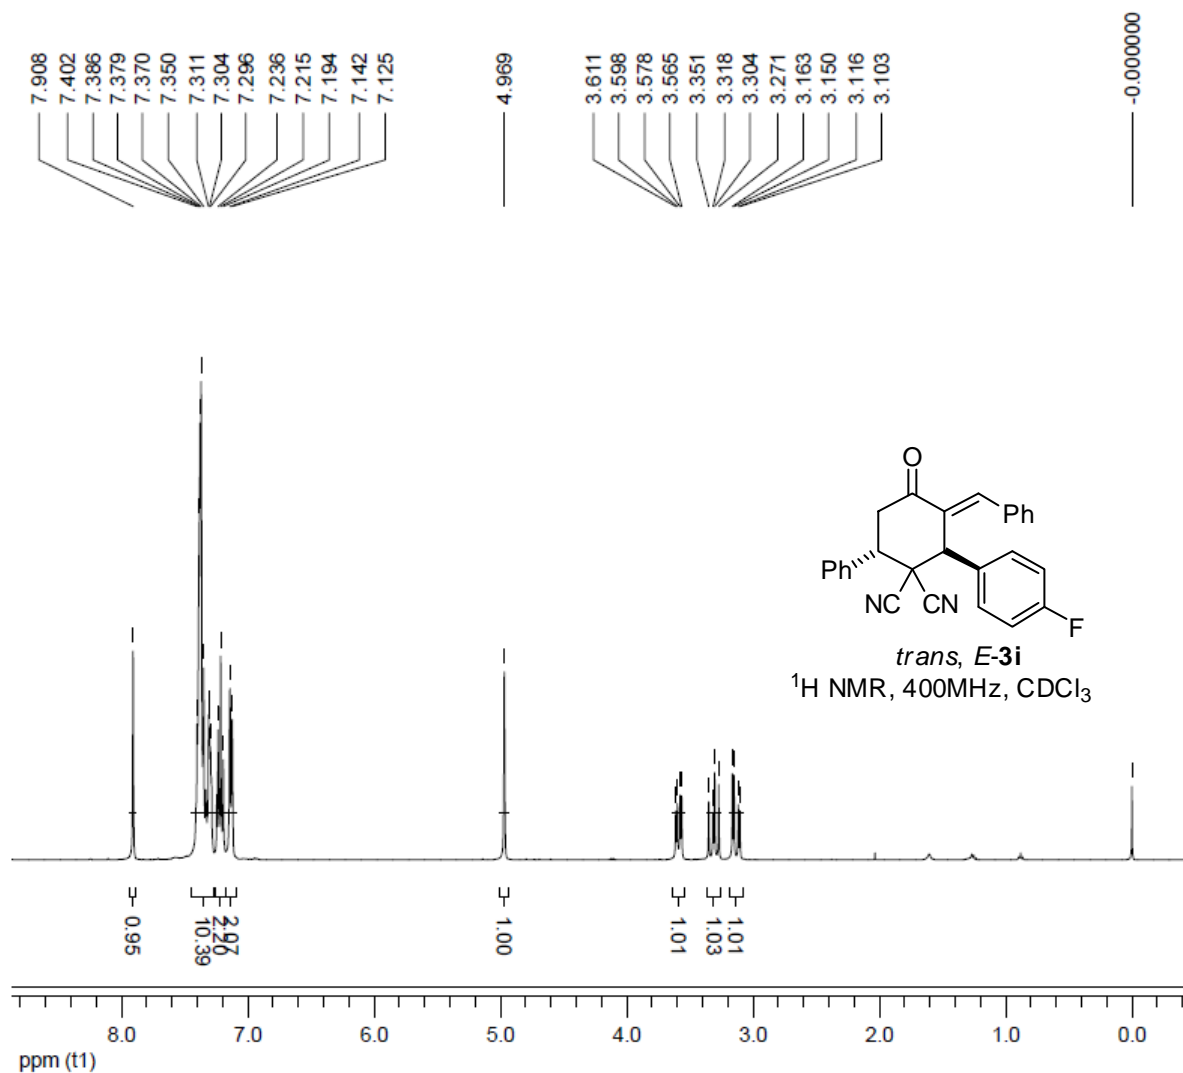

Date:  
5 Jul 2011  
Document's Title:  
n  
Spectrum Title:  
PROTON  
Frequency (MHz):  
(f1) 400.130  
Original Points Count:  
(f1) 32768  
Actual Points Count:  
(f1) 32768  
Acquisition Time (sec):  
(f1) 3.9846  
Spectral Width (ppm):  
(f1) 20.553  
Pulse Program:  
Unknown

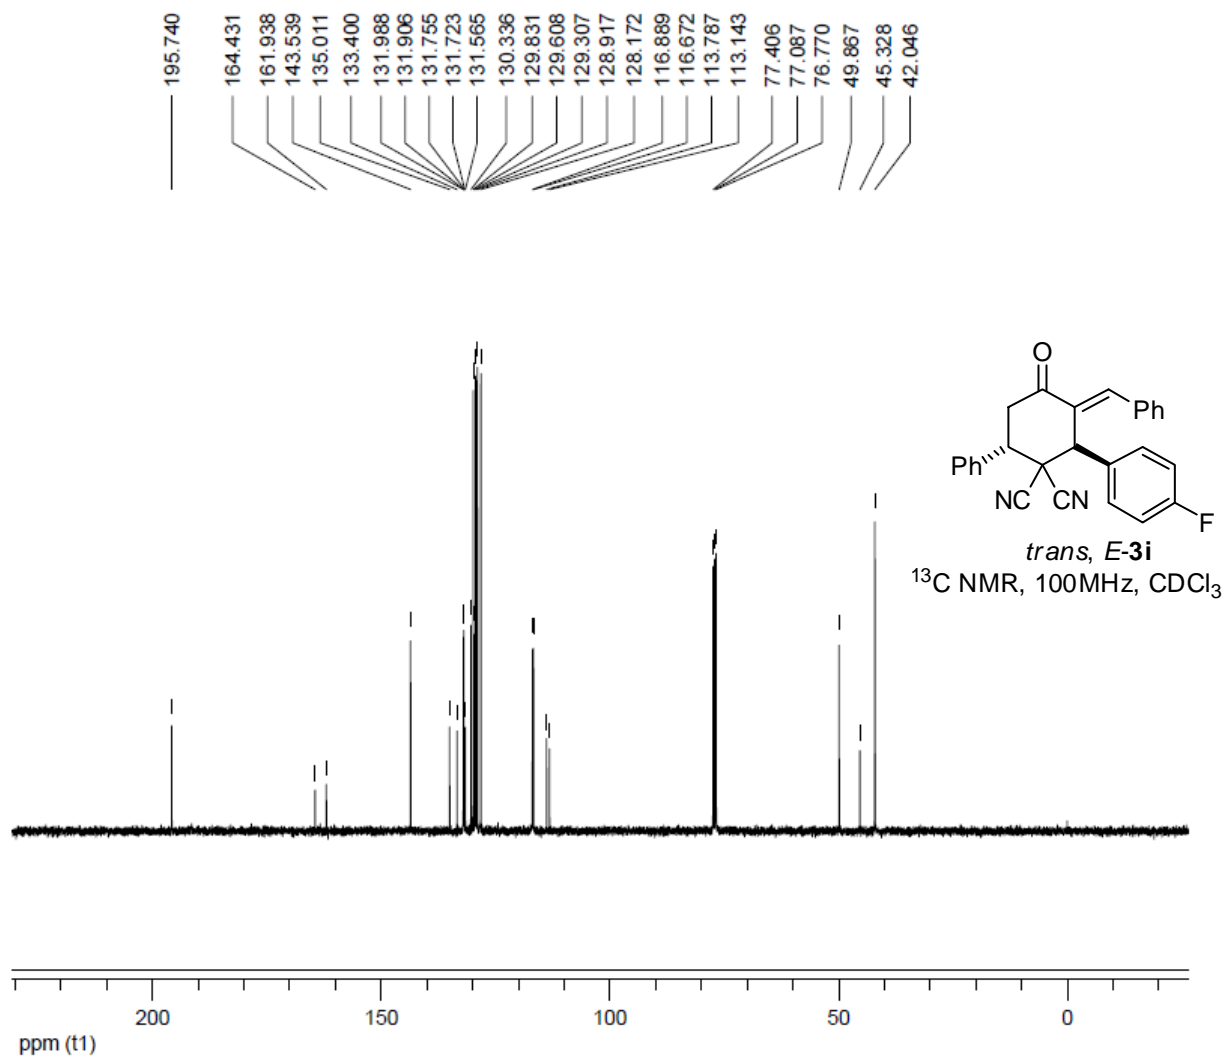

Date:

5 Jul 2011

Document's Title:

nc

Spectrum Title:

C13CPD

Frequency (MHz):

(f1) 100.613

Original Points Count:

(f1) 32768

Actual Points Count:

(f1) 32768

Acquisition Time (sec):

(f1) 0.9175

Spectral Width (ppm):

(f1) 354.968

Pulse Program:

Unknown

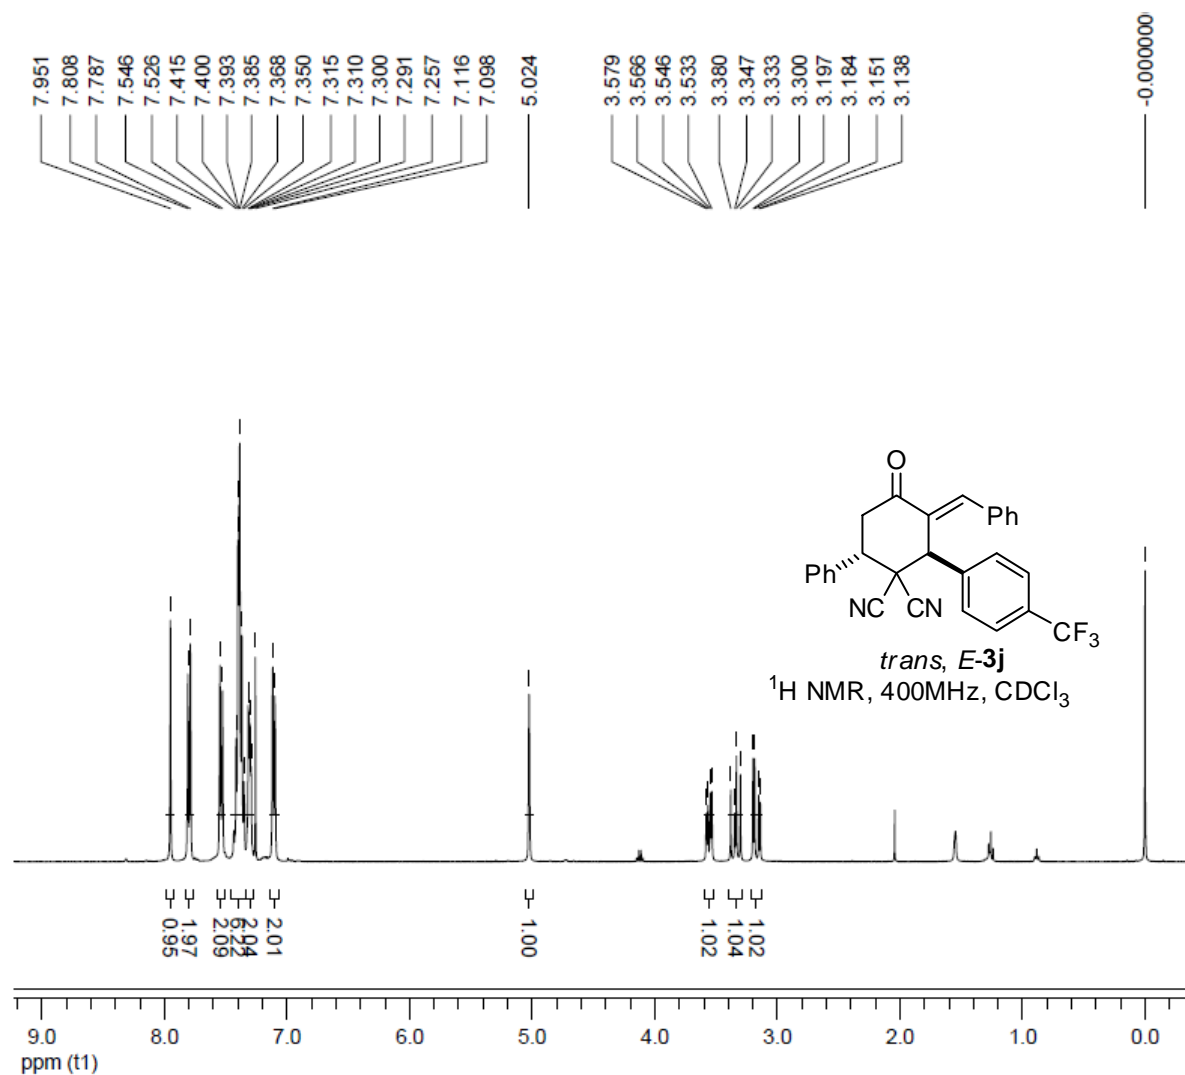

Date:

5 Jul 2011

Document's Title:

n

Spectrum Title:

PROTON

Frequency (MHz):

(f1) 400.130

Original Points Count:

(f1) 32768

Actual Points Count:

(f1) 32768

Acquisition Time (sec):

(f1) 3.9846

Spectral Width (ppm):

(f1) 20.553

Pulse Program:

Unknown

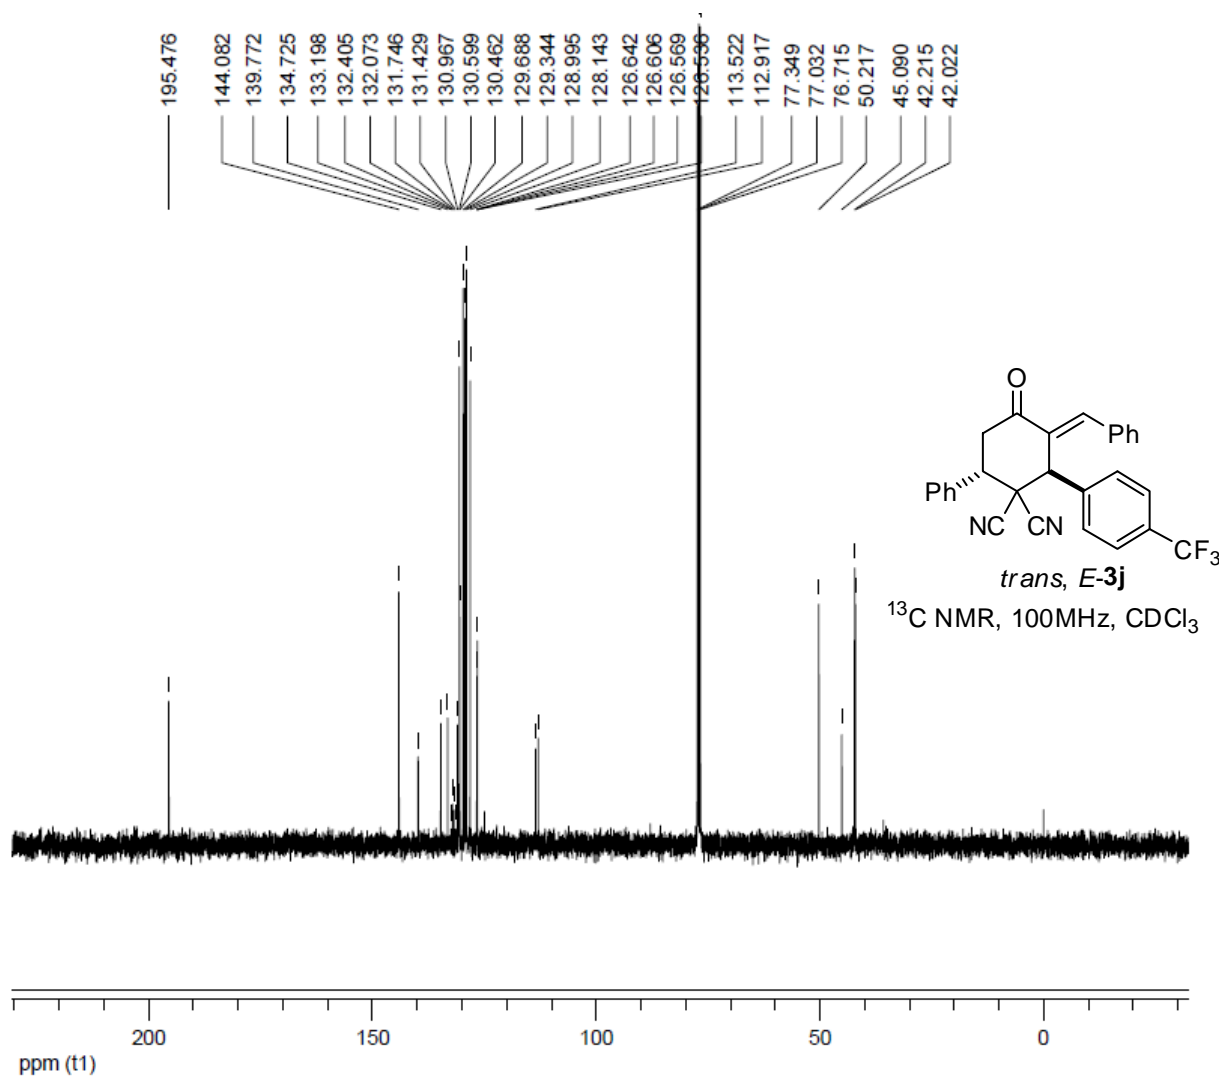

Date:

5 Jul 2011

Document's Title:

nc

Spectrum Title:

C13CPD

Frequency (MHz):

(f1) 100.613

Original Points Count:

(f1) 32768

Actual Points Count:

(f1) 32768

Acquisition Time (sec):

(f1) 0.9175

Spectral Width (ppm):

(f1) 354.968

Pulse Program:

Unknown

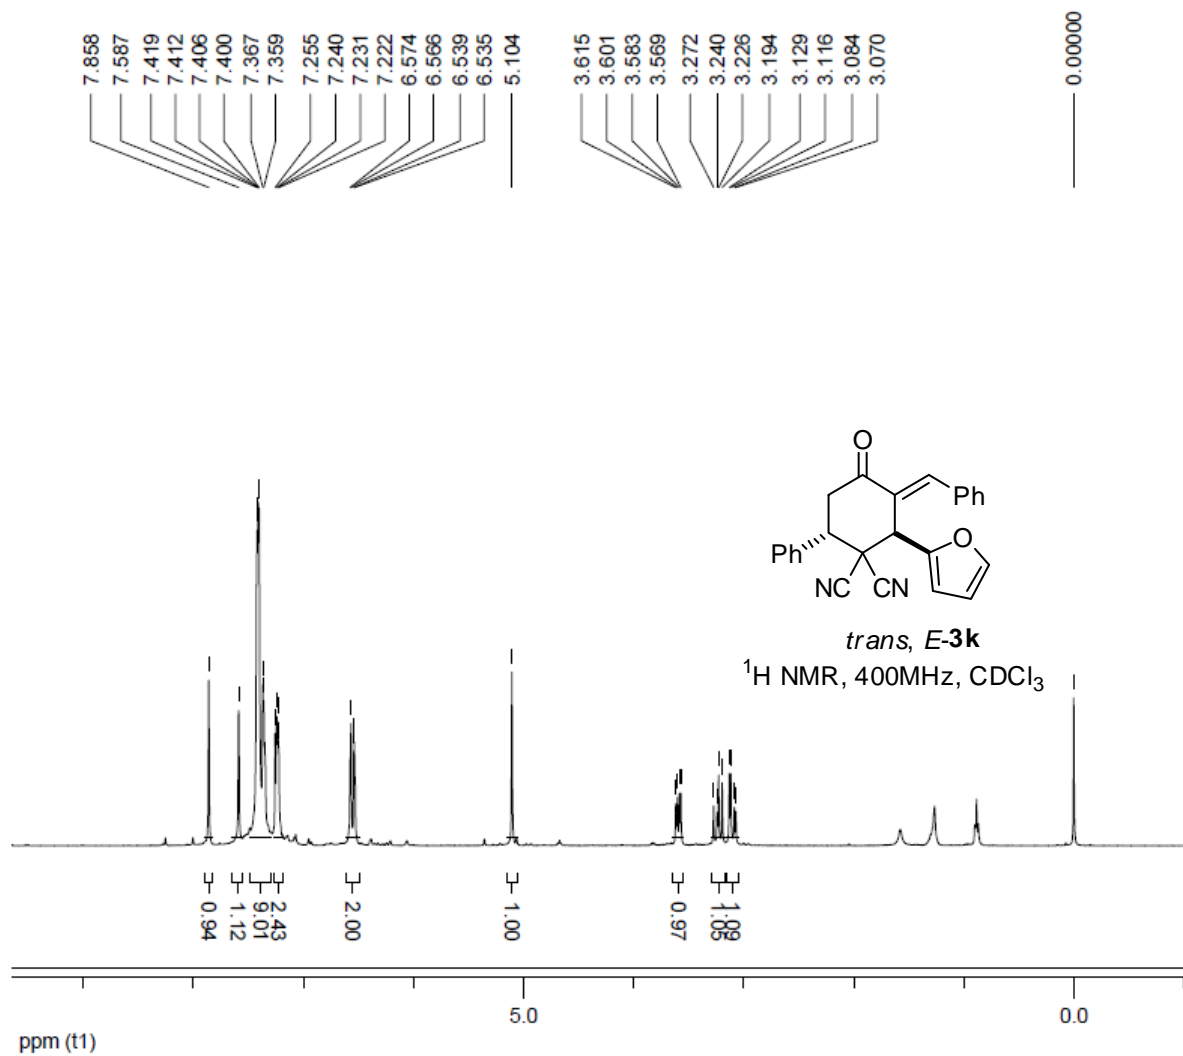

Date:

5 Jul 2011

Document's Title:

n

Spectrum Title:

PROTON

Frequency (MHz):

(f1) 400.130

Original Points Count:

(f1) 32768

Actual Points Count:

(f1) 32768

Acquisition Time (sec):

(f1) 3.9846

Spectral Width (ppm):

(f1) 20.553

Pulse Program:

Unknown

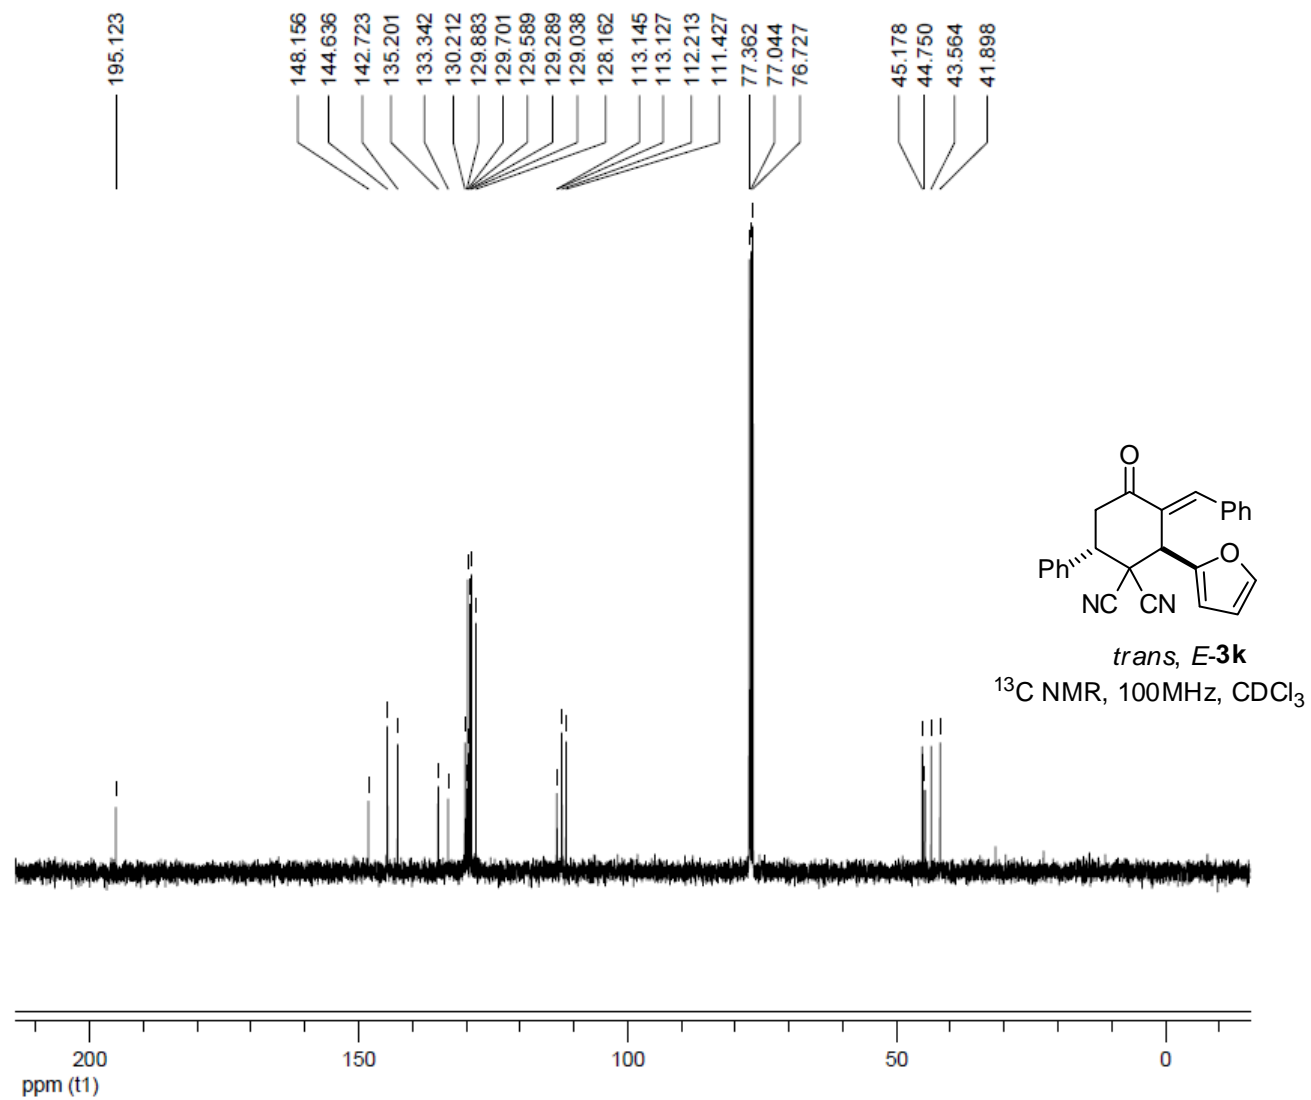

Date:  
5 Jul 2011  
Document's Title:  
nc

Spectrum Title:  
C13CPD

Frequency (MHz):  
(f1) 100.613  
Original Points Count:  
(f1) 32768  
Actual Points Count:  
(f1) 32768  
Acquisition Time (sec):  
(f1) 0.9175  
Spectral Width (ppm):  
(f1) 354.968  
Pulse Program:  
Unknown

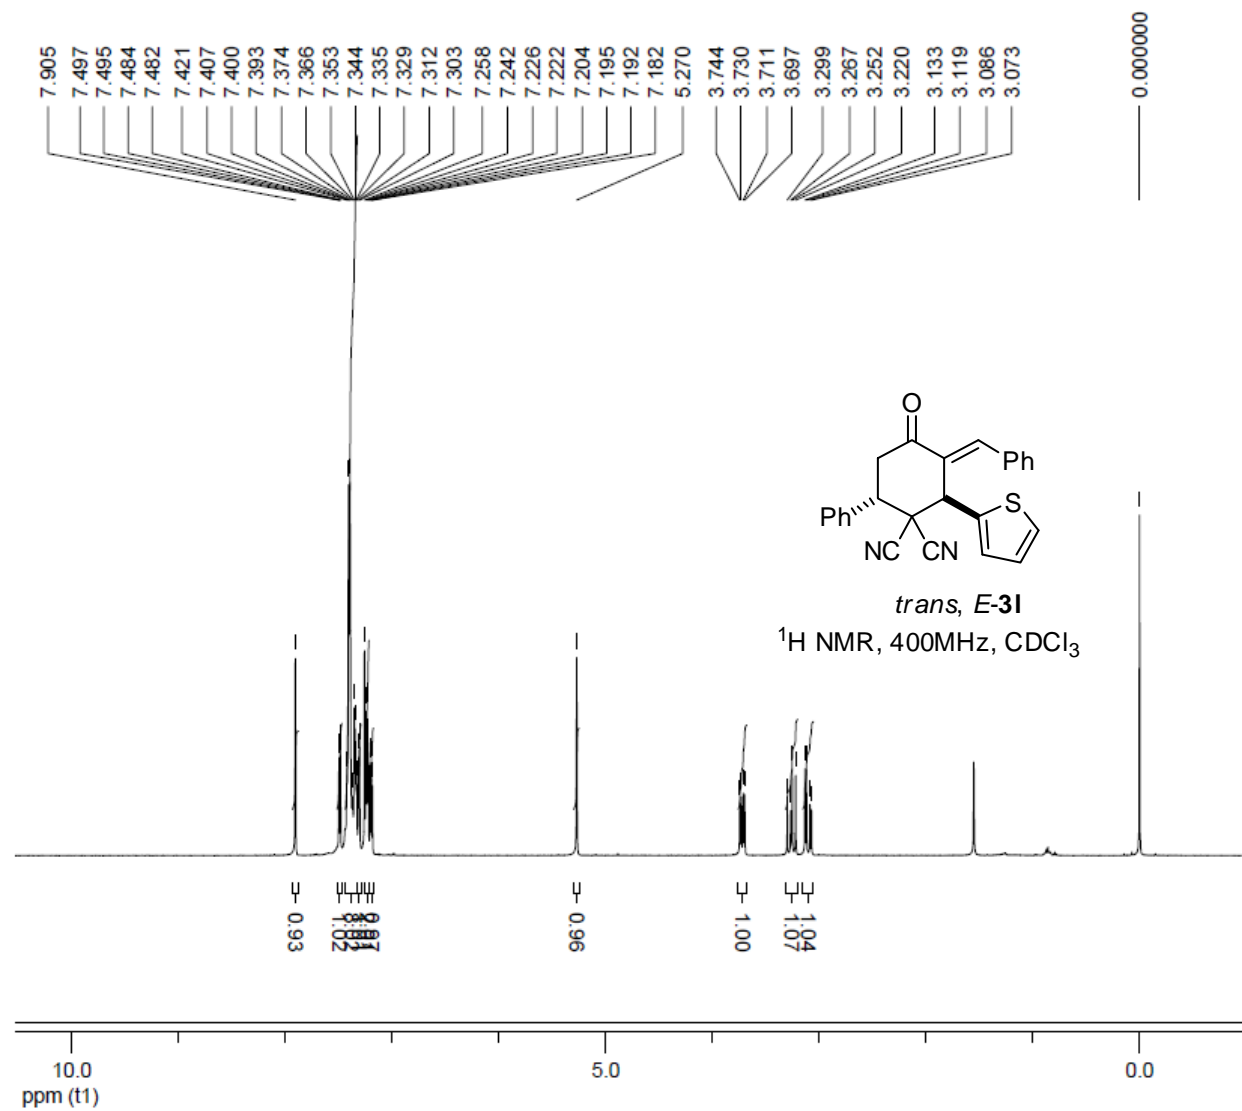

Date:  
5 Jul 2011  
Document's Title:  
n  
Spectrum Title:  
PROTON  
Frequency (MHz):  
(f1) 400.130  
Original Points Count:  
(f1) 32768  
Actual Points Count:  
(f1) 32768  
Acquisition Time (sec):  
(f1) 3.9846  
Spectral Width (ppm):  
(f1) 20.553  
Pulse Program:  
Unknown



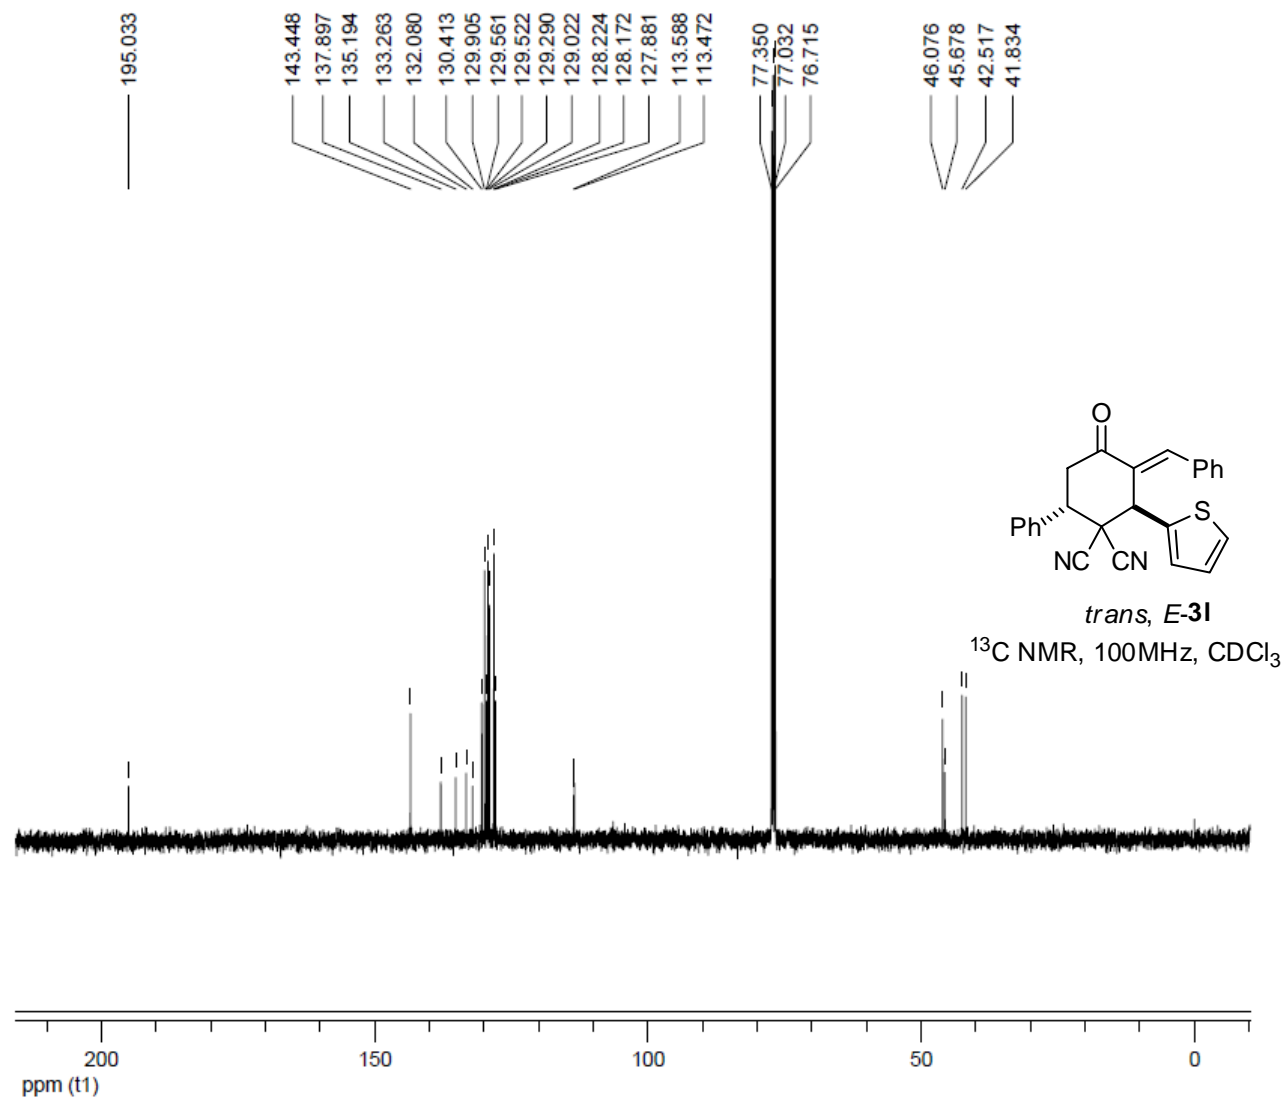

Date:  
5 Jul 2011  
Document's Title:  
nc

Spectrum Title:  
C13CPD

Frequency (MHz):  
(f1) 100.613  
Original Points Count:  
(f1) 32768  
Actual Points Count:  
(f1) 32768  
Acquisition Time (sec):  
(f1) 0.9175  
Spectral Width (ppm):  
(f1) 354.968  
Pulse Program:  
Unknown

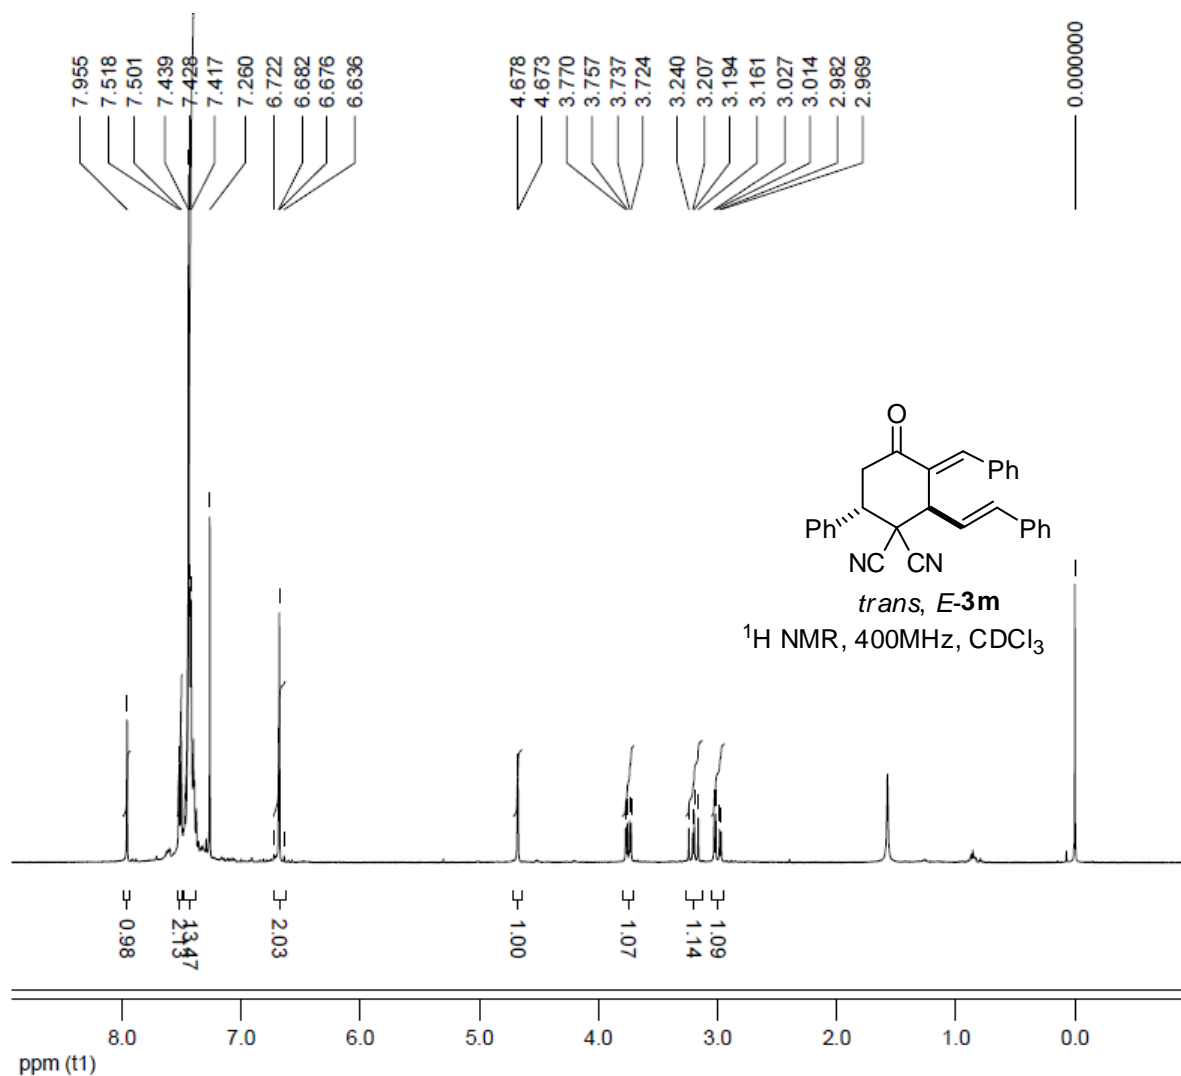

Date:  
5 Jul 2011  
Document's Title:  
n  
Spectrum Title:  
PROTON  
Frequency (MHz):  
(f1) 400.130  
Original Points Count:  
(f1) 32768  
Actual Points Count:  
(f1) 32768  
Acquisition Time (sec):  
(f1) 3.9846  
Spectral Width (ppm):  
(f1) 20.553  
Pulse Program:  
Unknown

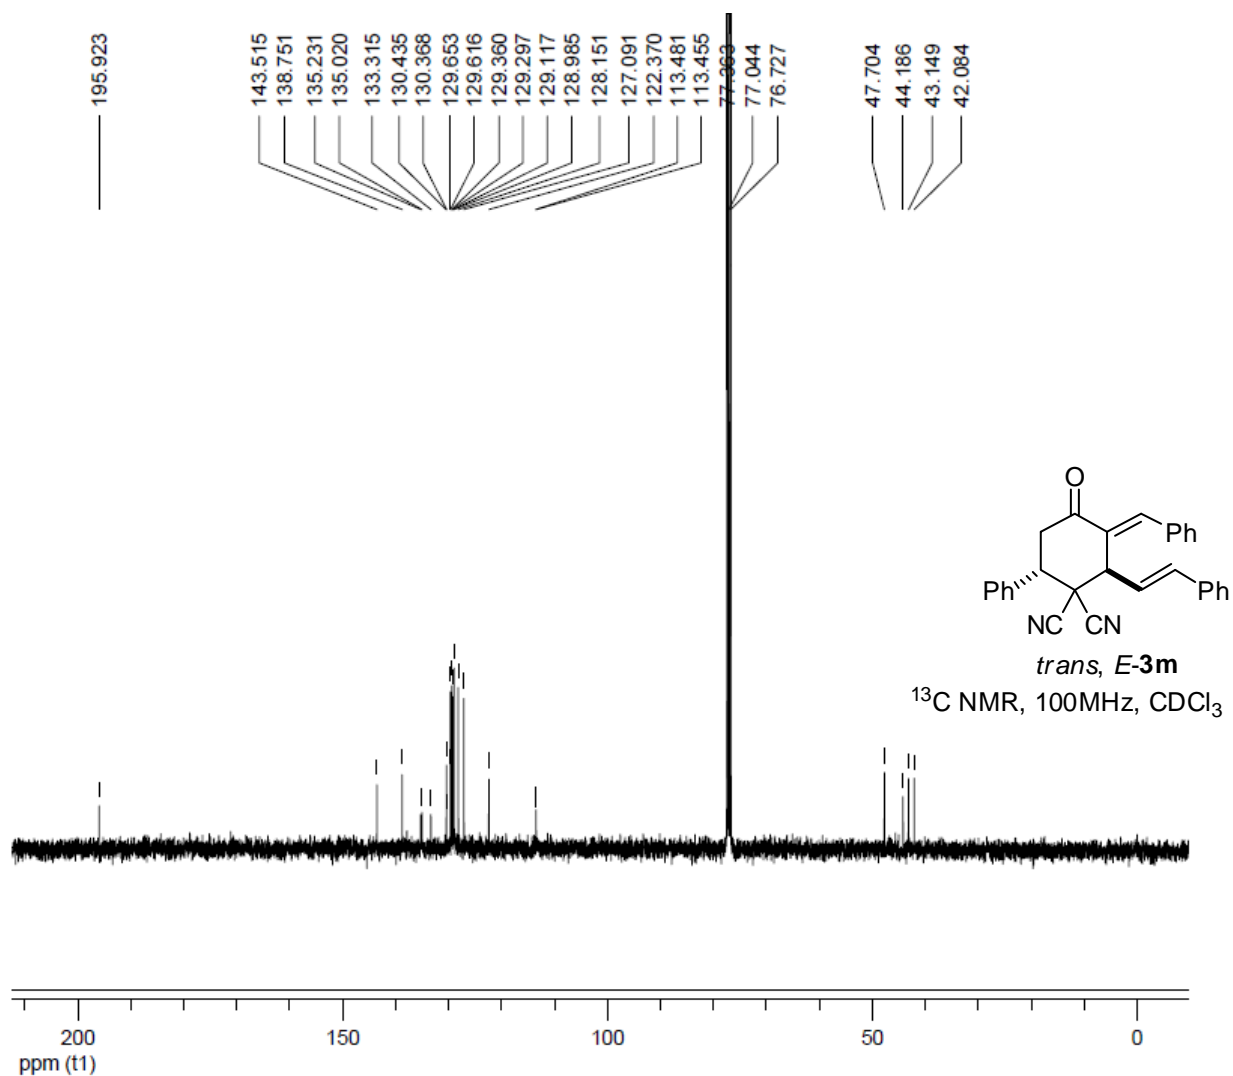

Date:

5 Jul 2011

Document's Title:

nc

Spectrum Title:

C13CPD

Frequency (MHz):

(f1) 100.613

Original Points Count:

(f1) 32768

Actual Points Count:

(f1) 32768

Acquisition Time (sec):

(f1) 0.9175

Spectral Width (ppm):

(f1) 354.968

Pulse Program:

Unknown

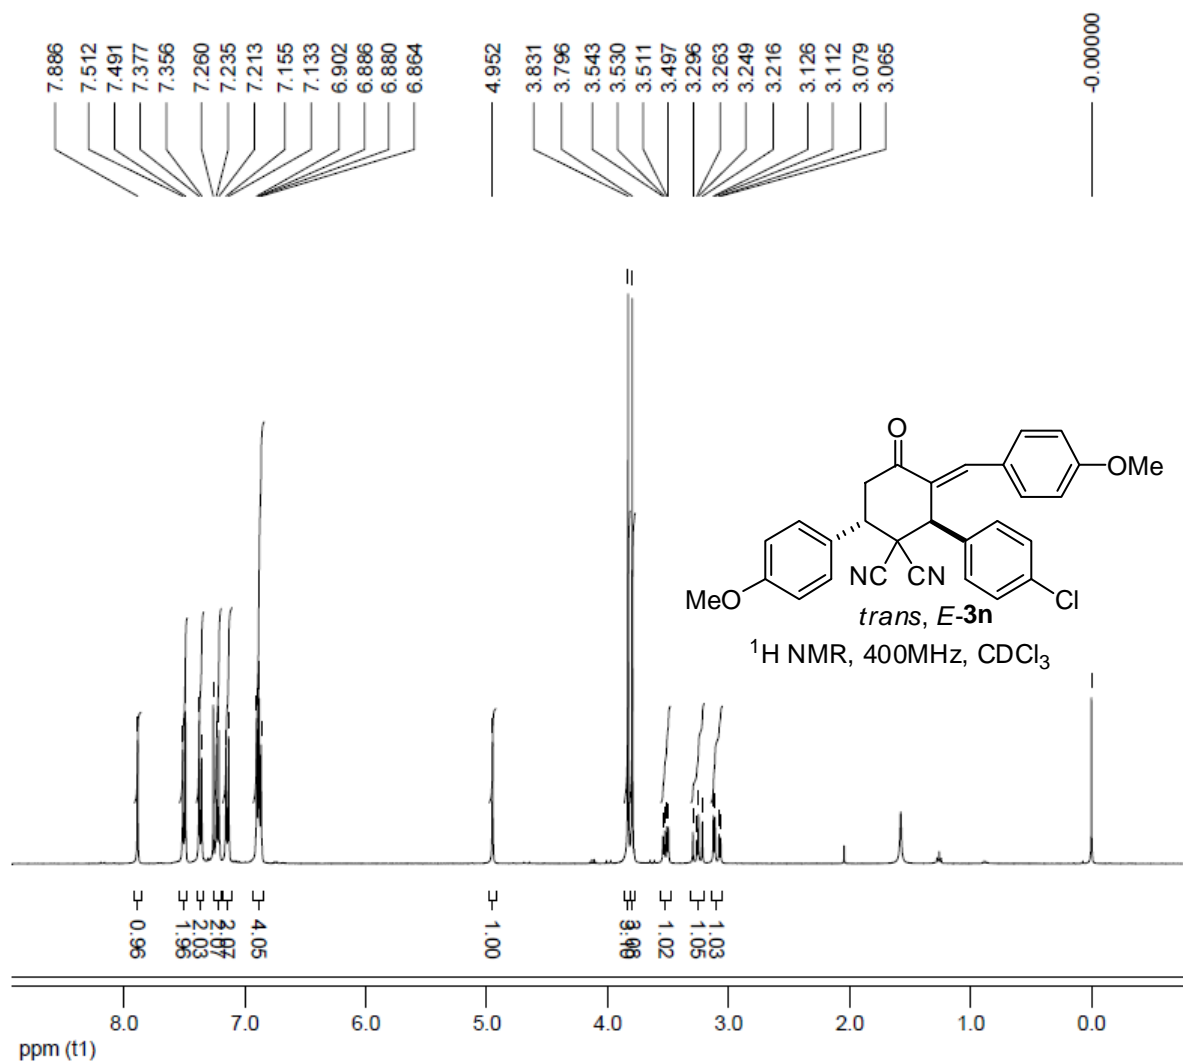

Date:

5 Jul 2011

Document's Title:

n

Spectrum Title:

PROTON

Frequency (MHz):

(f1) 400.130

Original Points Count:

(f1) 32768

Actual Points Count:

(f1) 32768

Acquisition Time (sec):

(f1) 3.9846

Spectral Width (ppm):

(f1) 20.553

Pulse Program:

Unknown

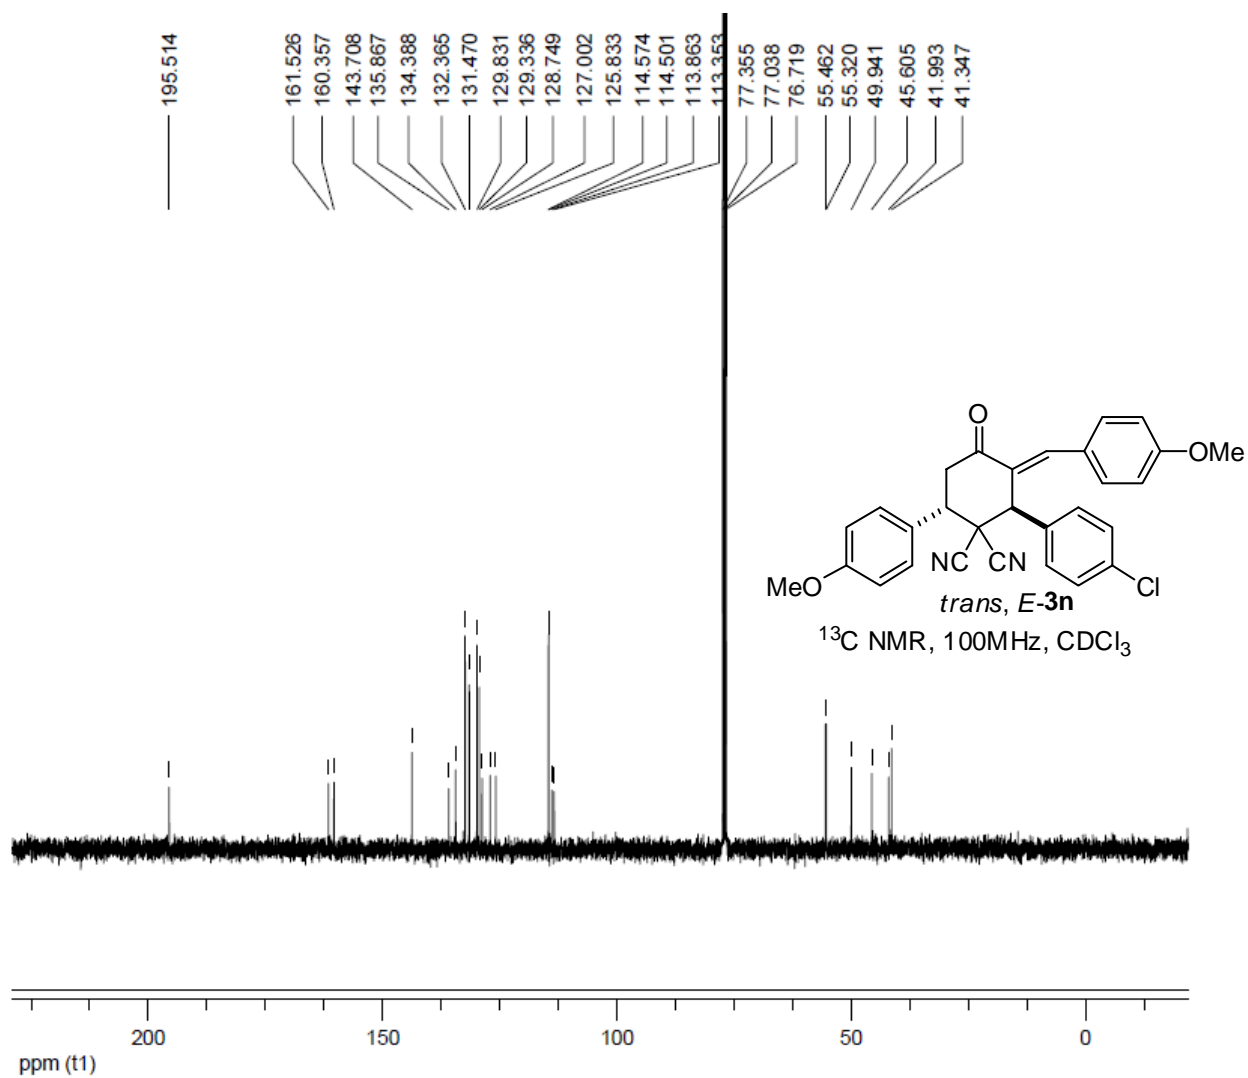

Date:

5 Jul 2011

Document's Title:

nc

Spectrum Title:

C13CPD

Frequency (MHz):

(f1) 100.613

Original Points Count:

(f1) 32768

Actual Points Count:

(f1) 32768

Acquisition Time (sec):

(f1) 0.9175

Spectral Width (ppm):

(f1) 354.968

Pulse Program:

Unknown

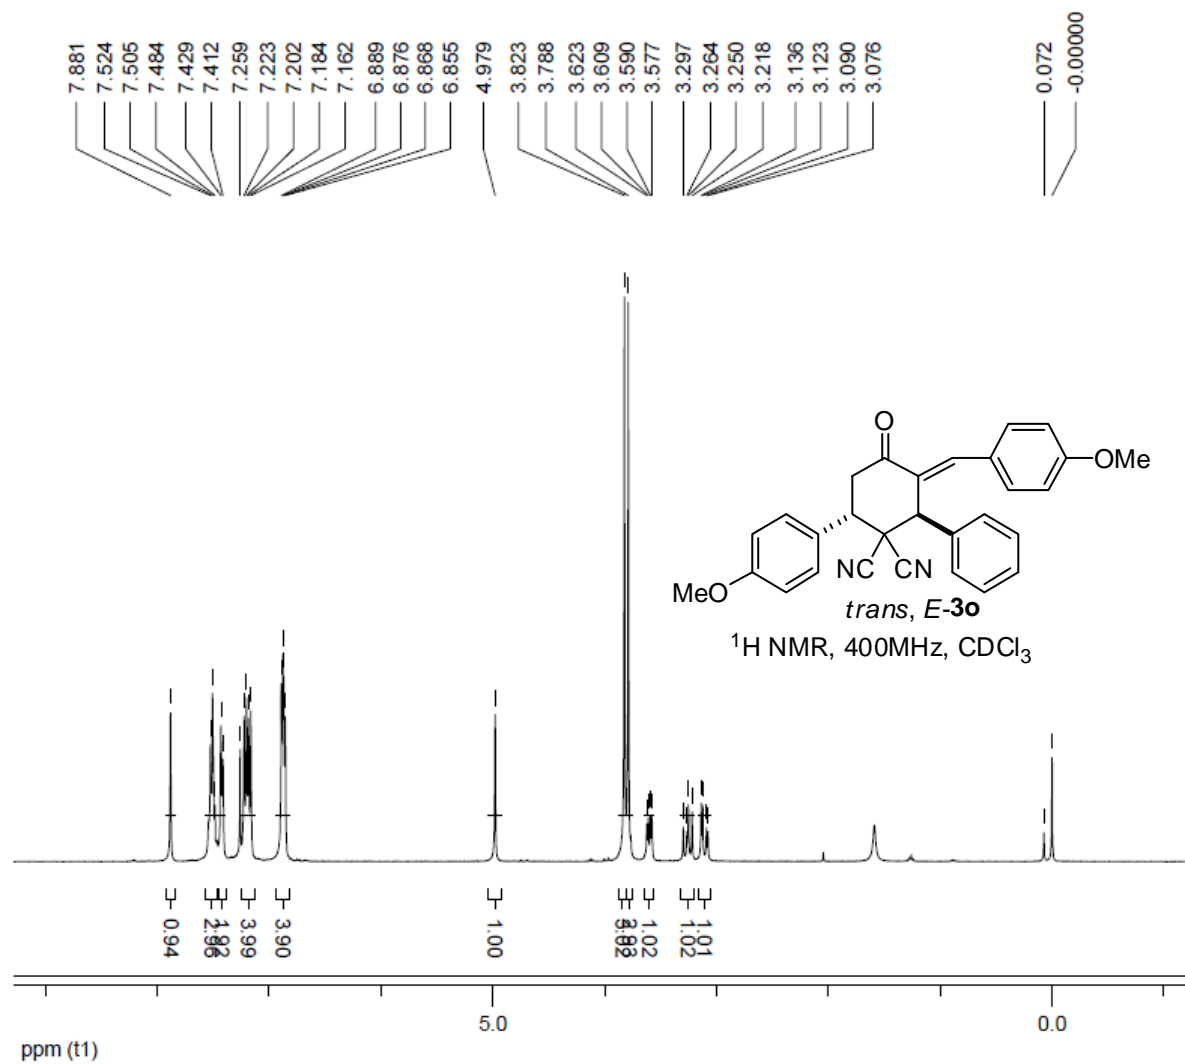

Date:

5 Jul 2011

Document's Title:

n

Spectrum Title:

PROTON

Frequency (MHz):

(f1) 400.130

Original Points Count:

(f1) 32768

Actual Points Count:

(f1) 32768

Acquisition Time (sec):

(f1) 3.9846

Spectral Width (ppm):

(f1) 20.553

Pulse Program:

Unknown

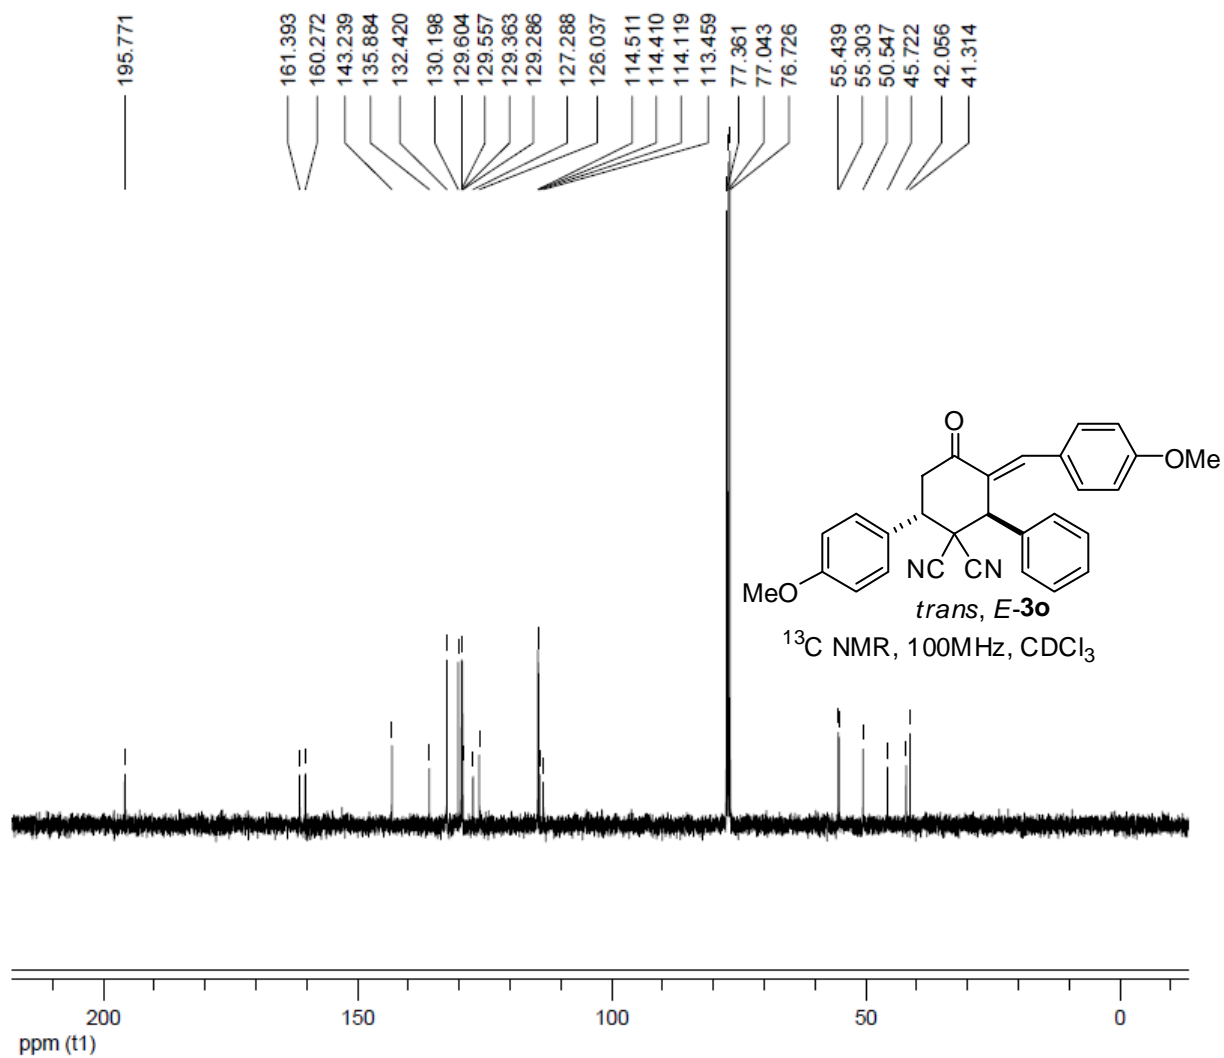

Date:

5 Jul 2011

Document's Title:

nc

Spectrum Title:

C13CPD

Frequency (MHz):

(f1) 100.613

Original Points Count:

(f1) 32768

Actual Points Count:

(f1) 32768

Acquisition Time (sec):

(f1) 0.9175

Spectral Width (ppm):

(f1) 354.968

Pulse Program:

Unknown

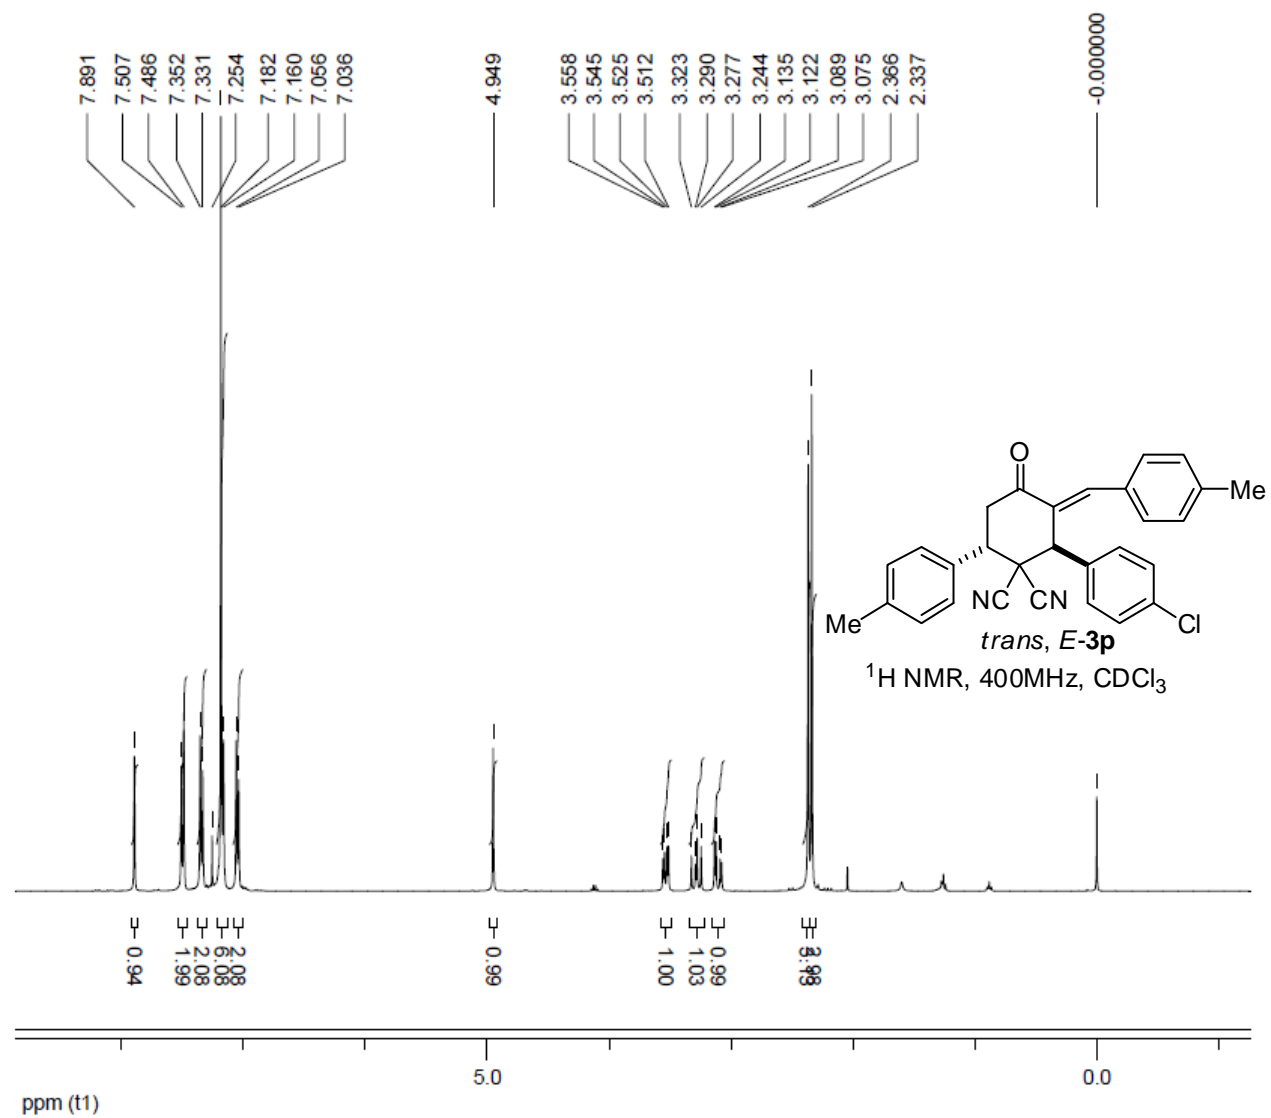

Date:  
5 Jul 2011  
Document's Title:  
n  
Spectrum Title:  
PROTON  
Frequency (MHz):  
(f1) 400.130  
Original Points Count:  
(f1) 32768  
Actual Points Count:  
(f1) 32768  
Acquisition Time (sec):  
(f1) 3.9846  
Spectral Width (ppm):  
(f1) 20.553  
Pulse Program:  
Unknown



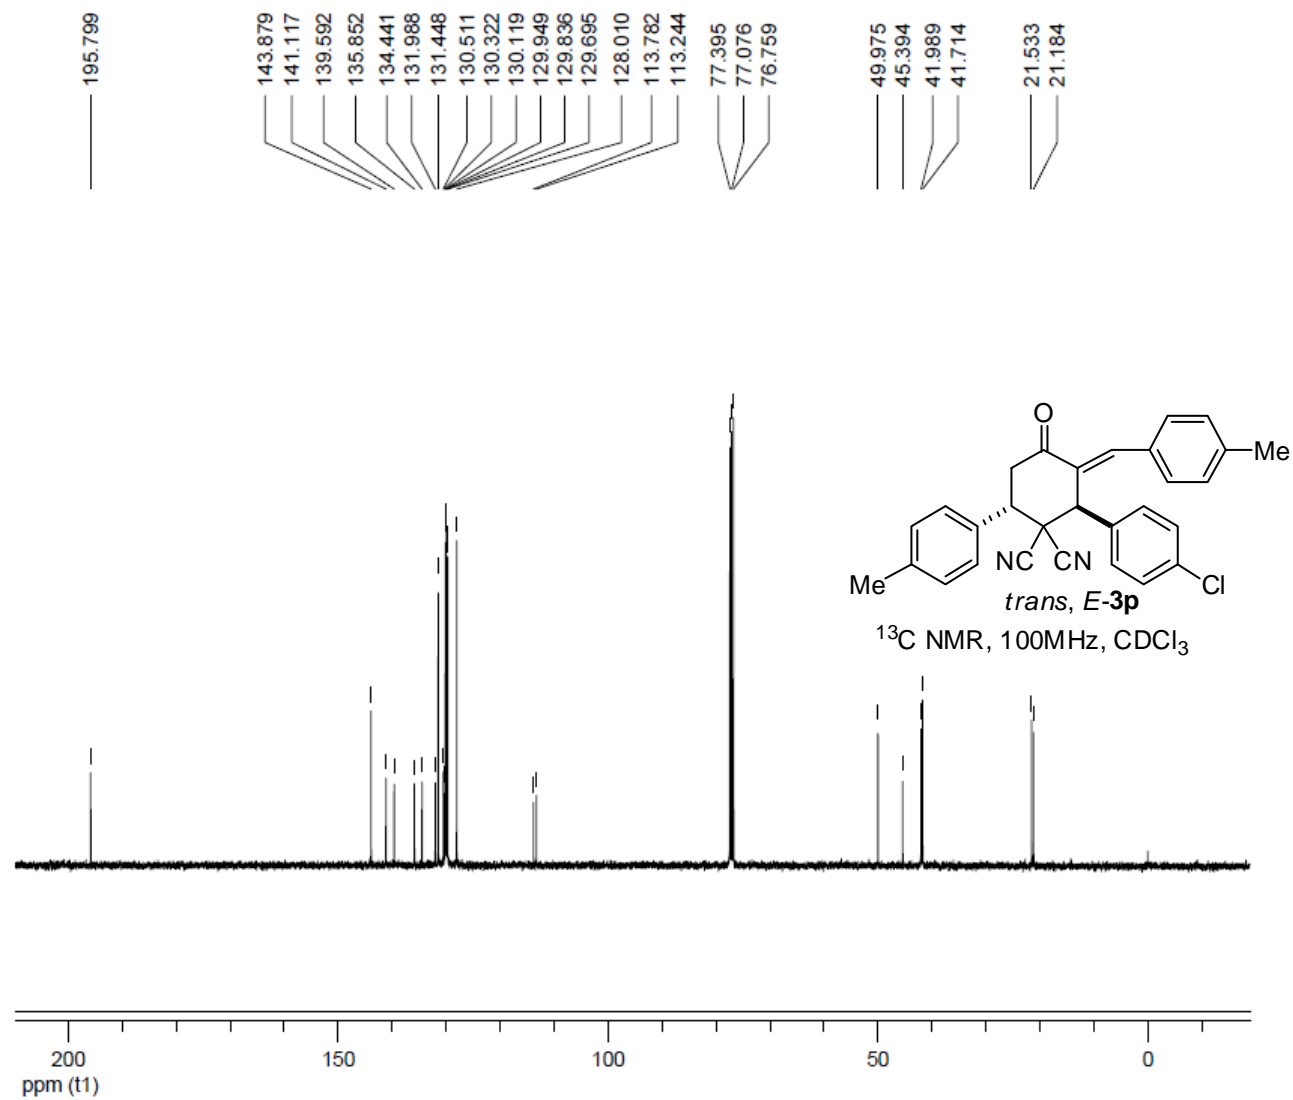

Date:  
5 Jul 2011  
Document's Title:  
1r

Spectrum Title:  
C13CPD

Frequency (MHz):  
(f1) 100.613  
Original Points Count:  
(f1) 32768  
Actual Points Count:  
(f1) 32768  
Acquisition Time (sec):  
(f1) 0.9175  
Spectral Width (ppm):  
(f1) 354.968  
Pulse Program:  
Unknown

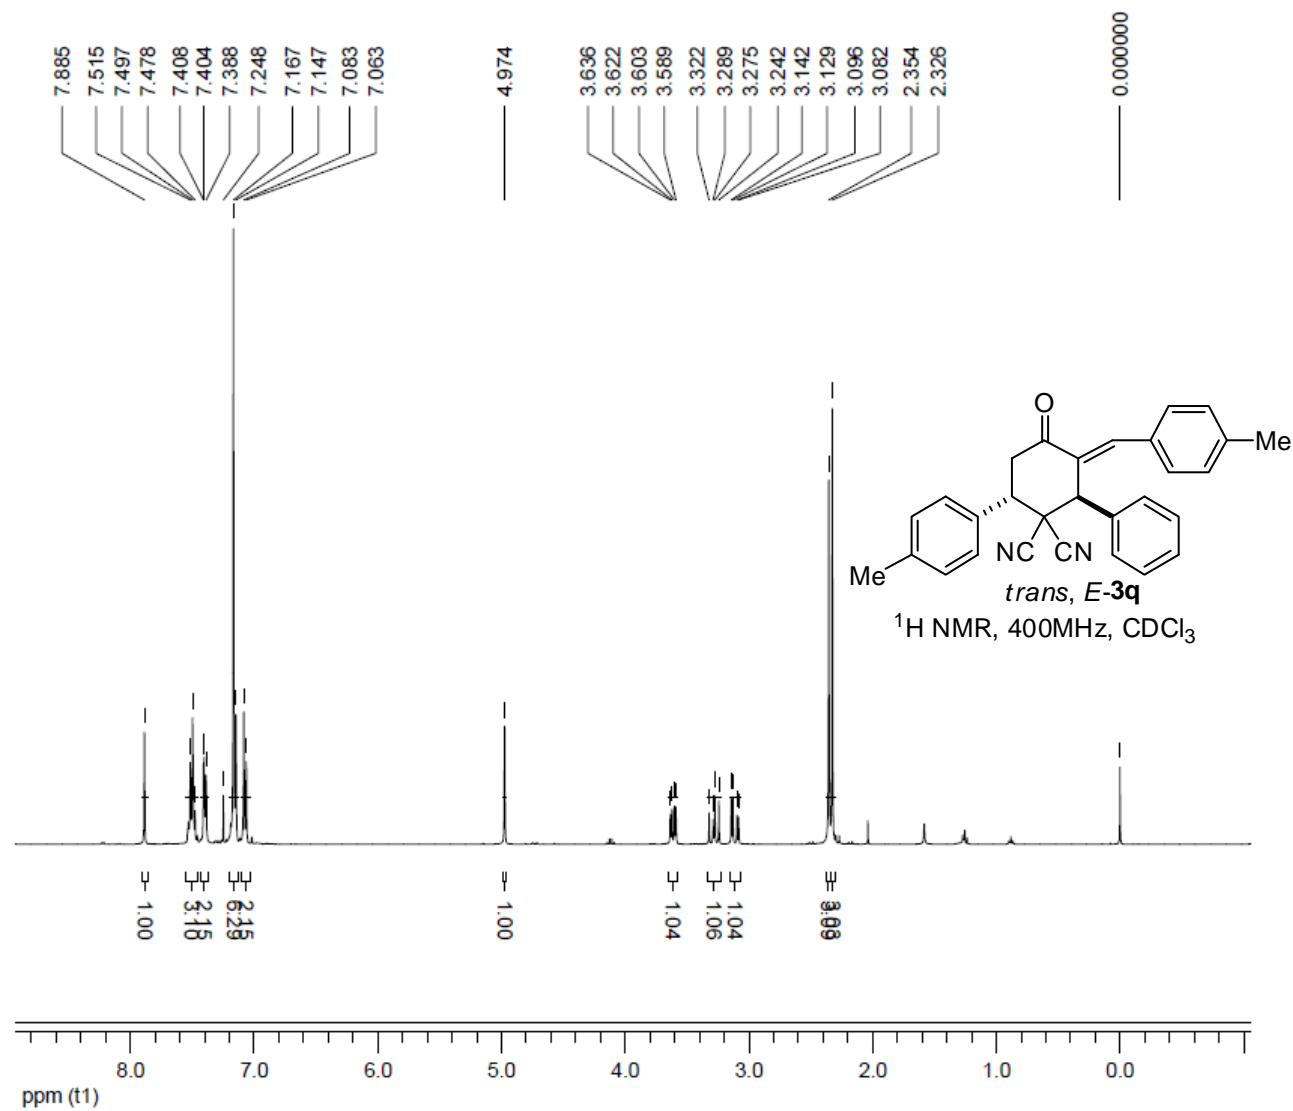

Date:  
5 Jul 2011  
Document's Title:  
n  
Spectrum Title:  
PROTON  
Frequency (MHz):  
(f1) 400.130  
Original Points Count:  
(f1) 32768  
Actual Points Count:  
(f1) 32768  
Acquisition Time (sec):  
(f1) 3.9846  
Spectral Width (ppm):  
(f1) 20.553  
Pulse Program:  
Unknown

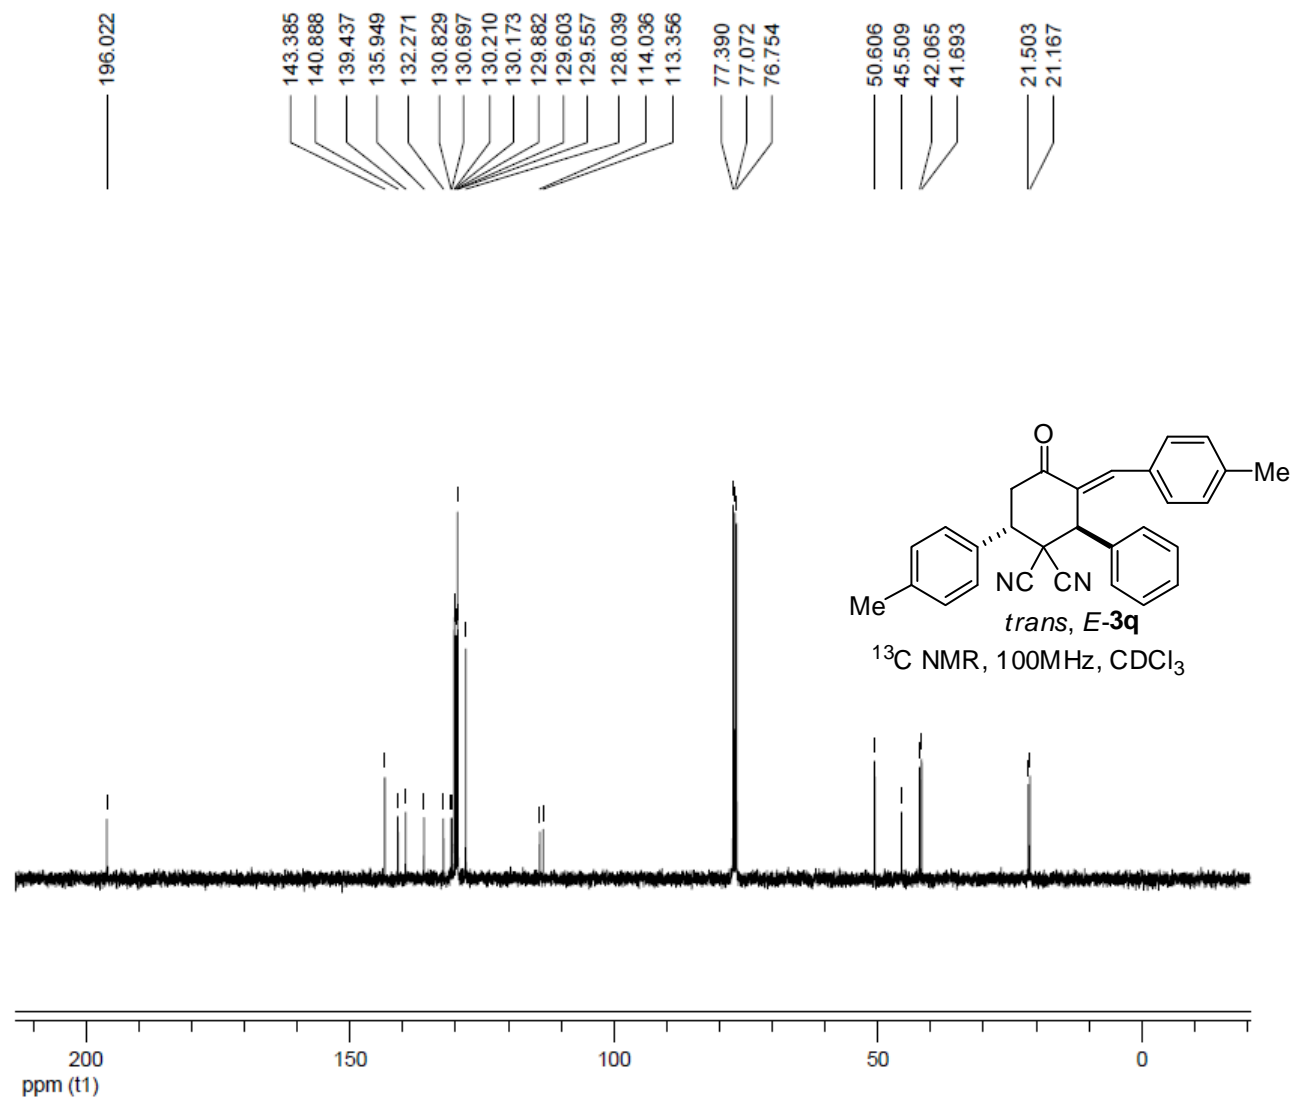

Date:  
5 Jul 2011  
Document's Title:  
1r

Spectrum Title:  
C13CPD

Frequency (MHz):  
(f1) 100.613  
Original Points Count:  
(f1) 32768  
Actual Points Count:  
(f1) 32768  
Acquisition Time (sec):  
(f1) 1.1010  
Spectral Width (ppm):  
(f1) 295.806  
Pulse Program:  
Unknown

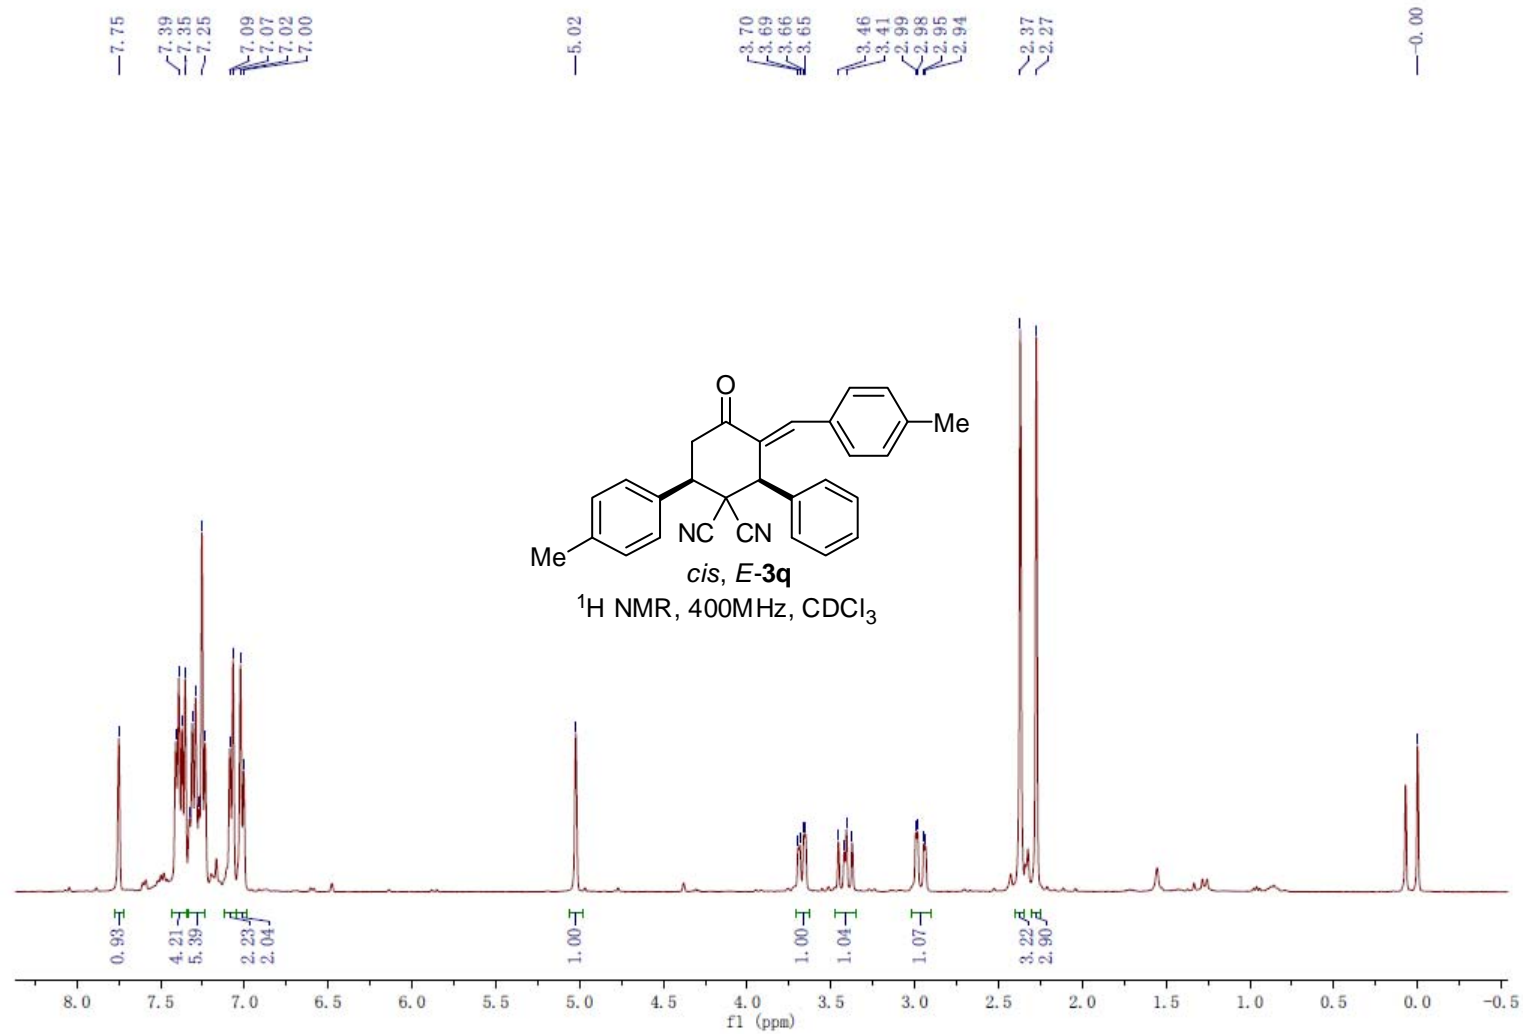

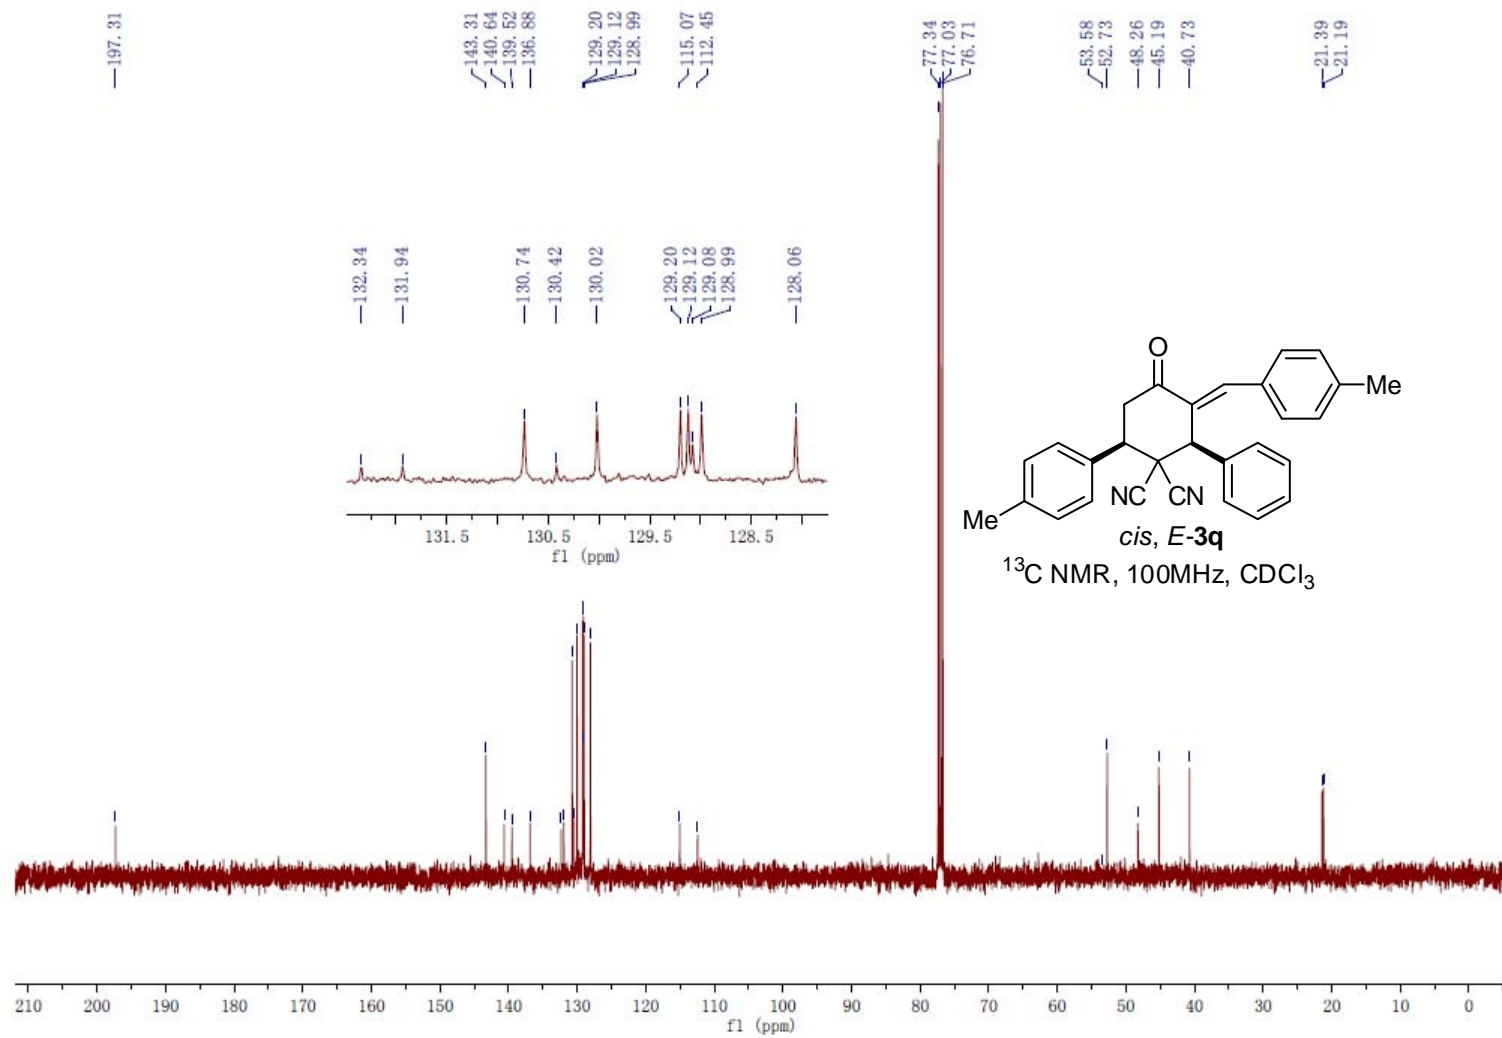

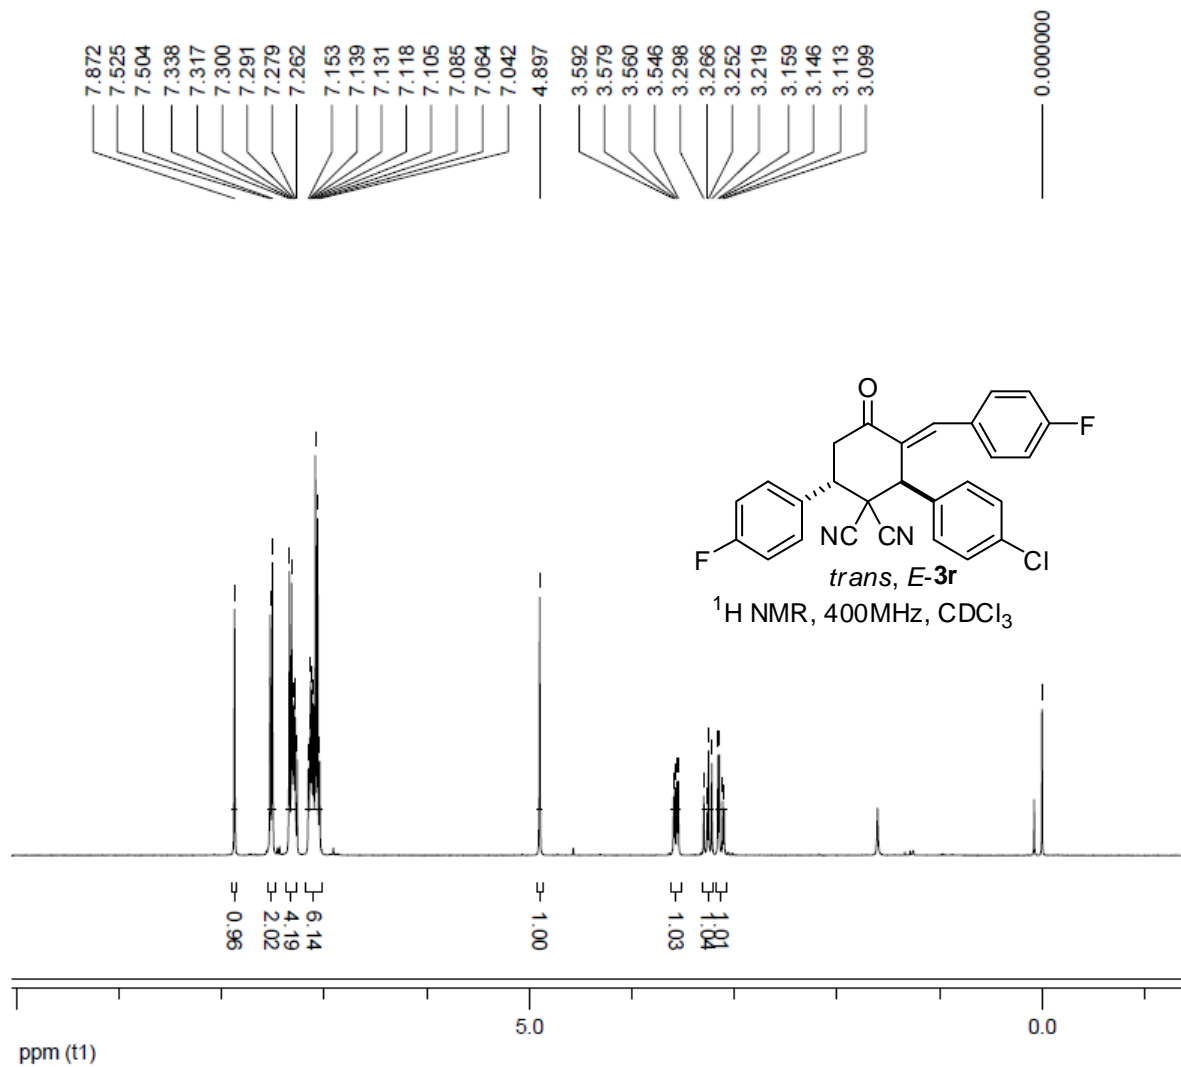

Date:

5 Jul 2011

Document's Title:

n

Spectrum Title:

PROTON

Frequency (MHz):

(f1) 400.130

Original Points Count:

(f1) 32768

Actual Points Count:

(f1) 32768

Acquisition Time (sec):

(f1) 3.9846

Spectral Width (ppm):

(f1) 20.553

Pulse Program:

Unknown

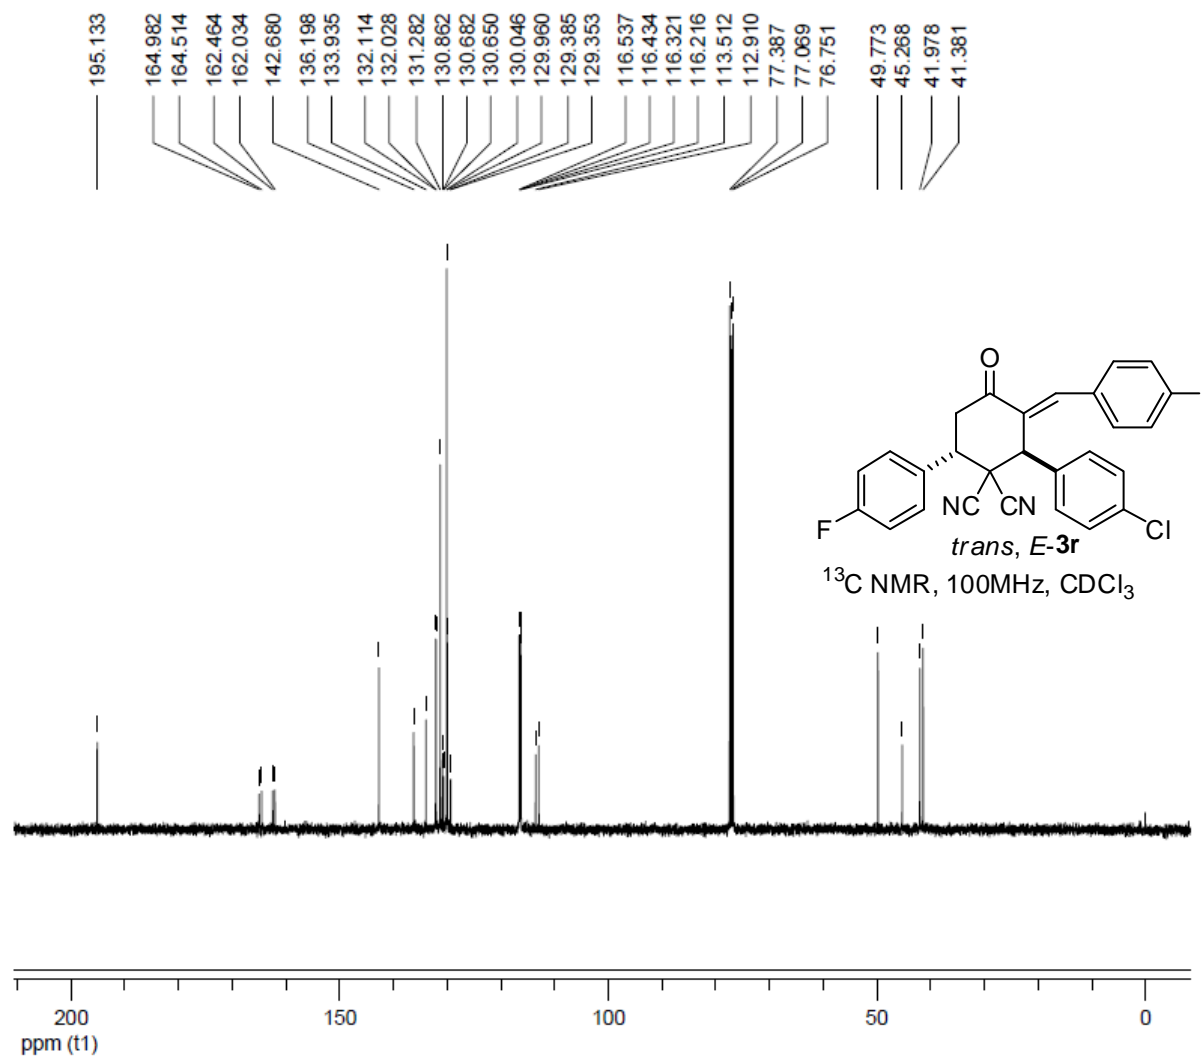

Date:

5 Jul 2011

Document's Title:

nc

Spectrum Title:

C13CPD

Frequency (MHz):

(f1) 100.613

Original Points Count:

(f1) 32768

Actual Points Count:

(f1) 32768

Acquisition Time (sec):

(f1) 0.9175

Spectral Width (ppm):

(f1) 354.968

Pulse Program:

Unknown

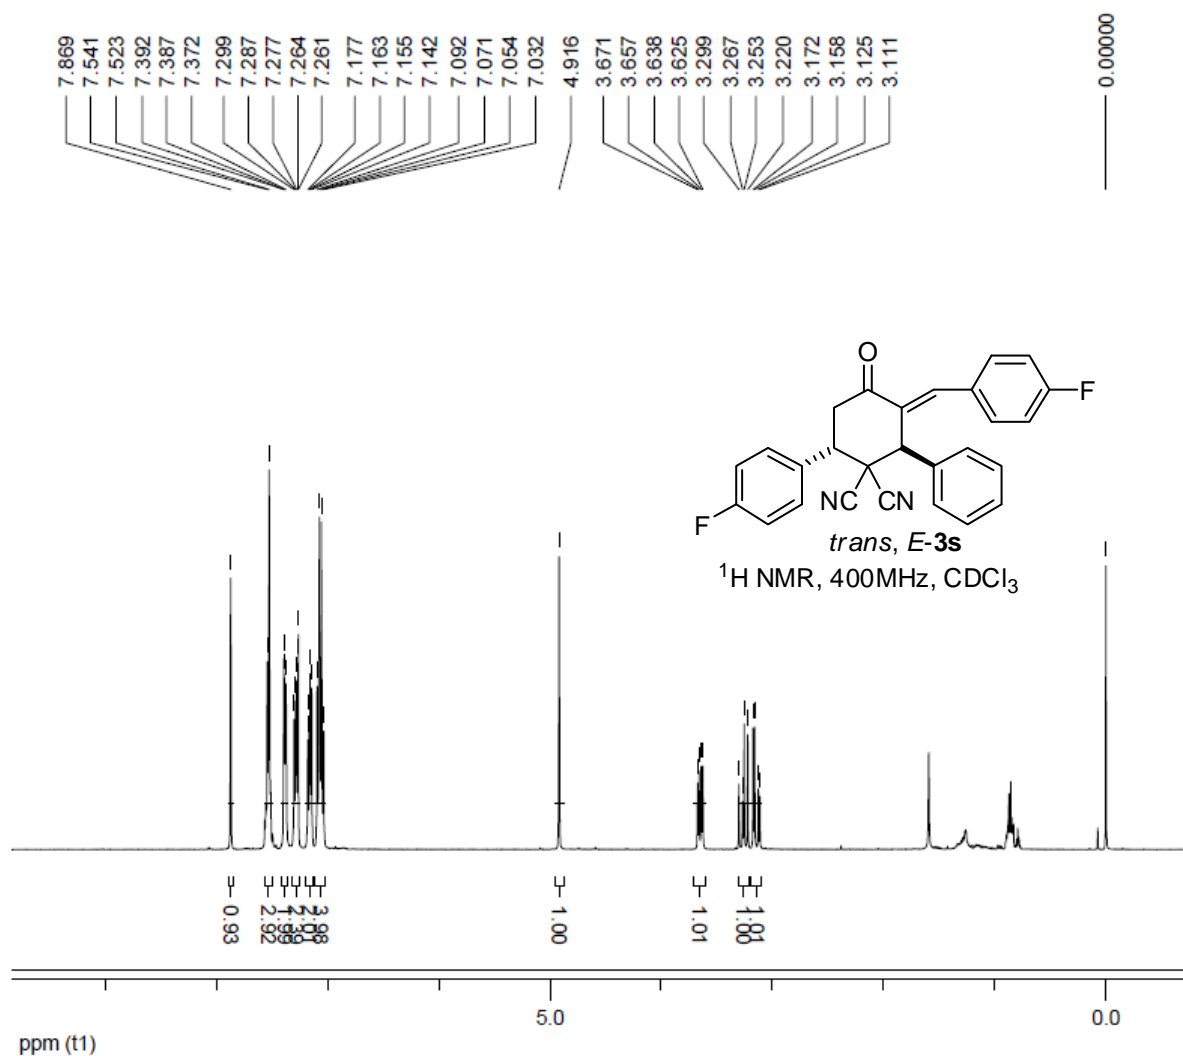

Date:

5 Jul 2011

Document's Title:

n

Spectrum Title:

PROTON

Frequency (MHz):

(f1) 400.130

Original Points Count:

(f1) 32768

Actual Points Count:

(f1) 32768

Acquisition Time (sec):

(f1) 3.9846

Spectral Width (ppm):

(f1) 20.553

Pulse Program:

Unknown



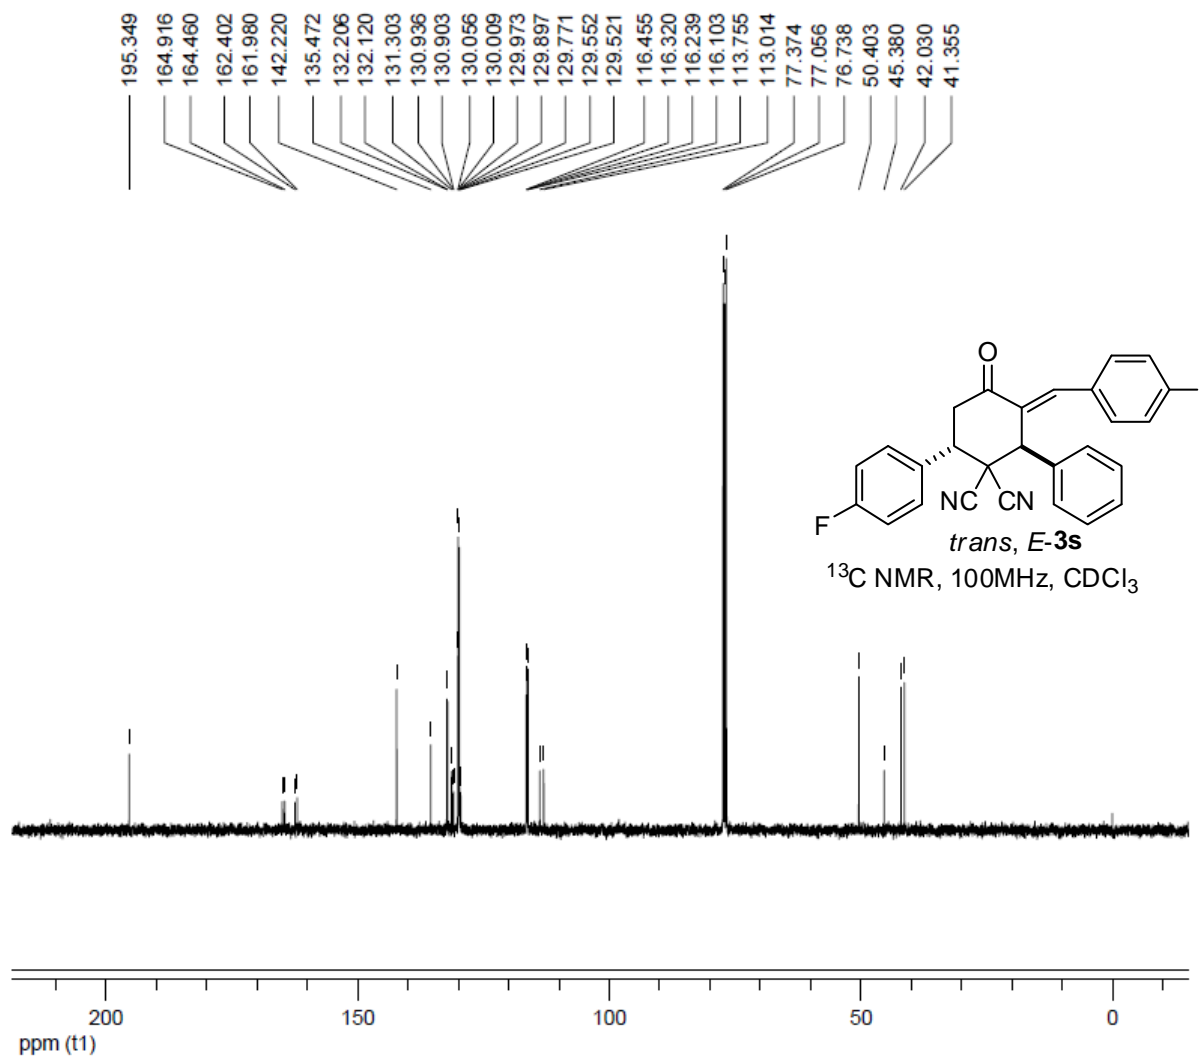

Date:

5 Jul 2011

Document's Title:

nc

Spectrum Title:

C13CPD

Frequency (MHz):

(f1) 100.613

Original Points Count:

(f1) 32768

Actual Points Count:

(f1) 32768

Acquisition Time (sec):

(f1) 0.9175

Spectral Width (ppm):

(f1) 354.968

Pulse Program:

Unknown

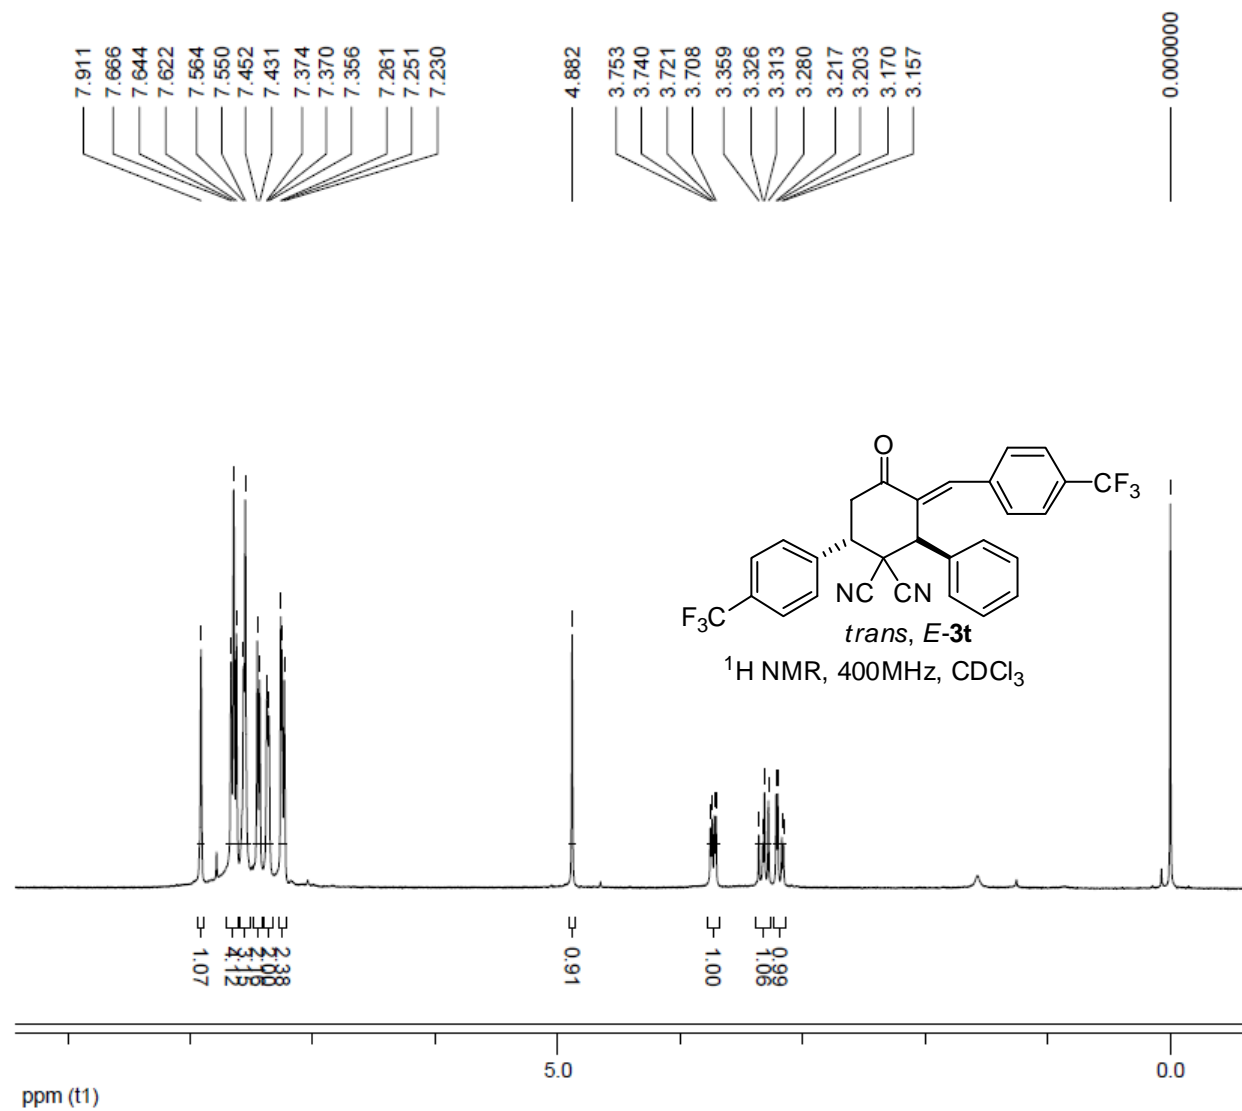

Date:  
5 Jul 2011  
Document's Title:  
n

Spectrum Title:  
PROTON

Frequency (MHz):  
(f1) 400.230  
Original Points Count:  
(f1) 32768  
Actual Points Count:  
(f1) 32768  
Acquisition Time (sec):  
(f1) 3.9846  
Spectral Width (ppm):  
(f1) 20.547  
Pulse Program:  
Unknown

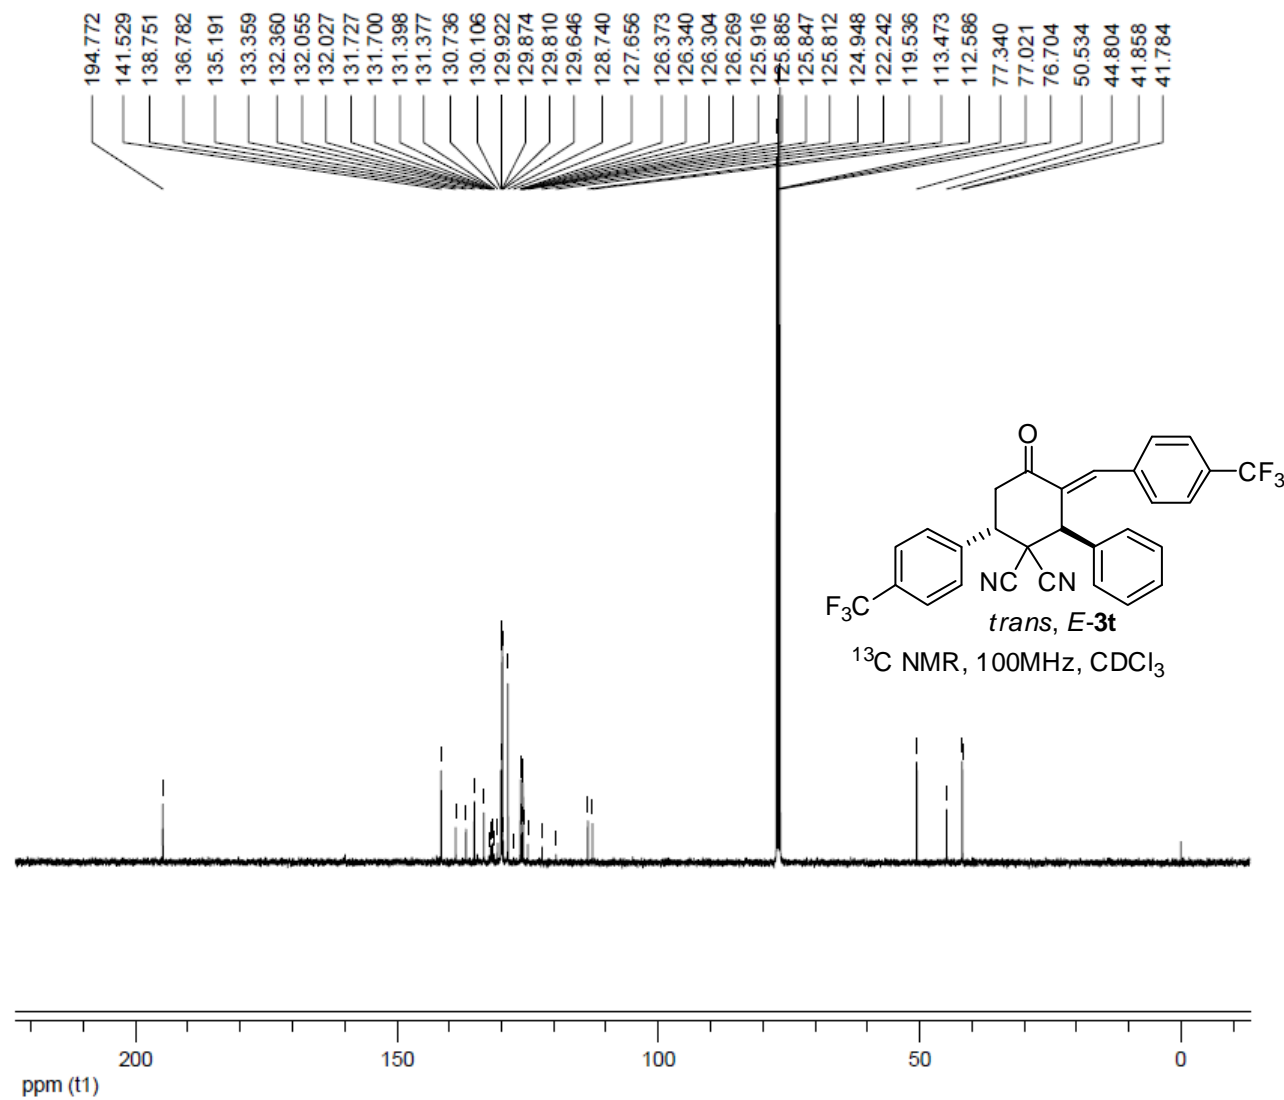

Date:  
5 Jul 2011  
Document's Title:  
nc

Spectrum Title:  
C13CPD

Frequency (MHz):  
(f1) 100.613  
Original Points Count:  
(f1) 32768  
Actual Points Count:  
(f1) 32768  
Acquisition Time (sec):  
(f1) 0.9175  
Spectral Width (ppm):  
(f1) 354.968  
Pulse Program:  
Unknown

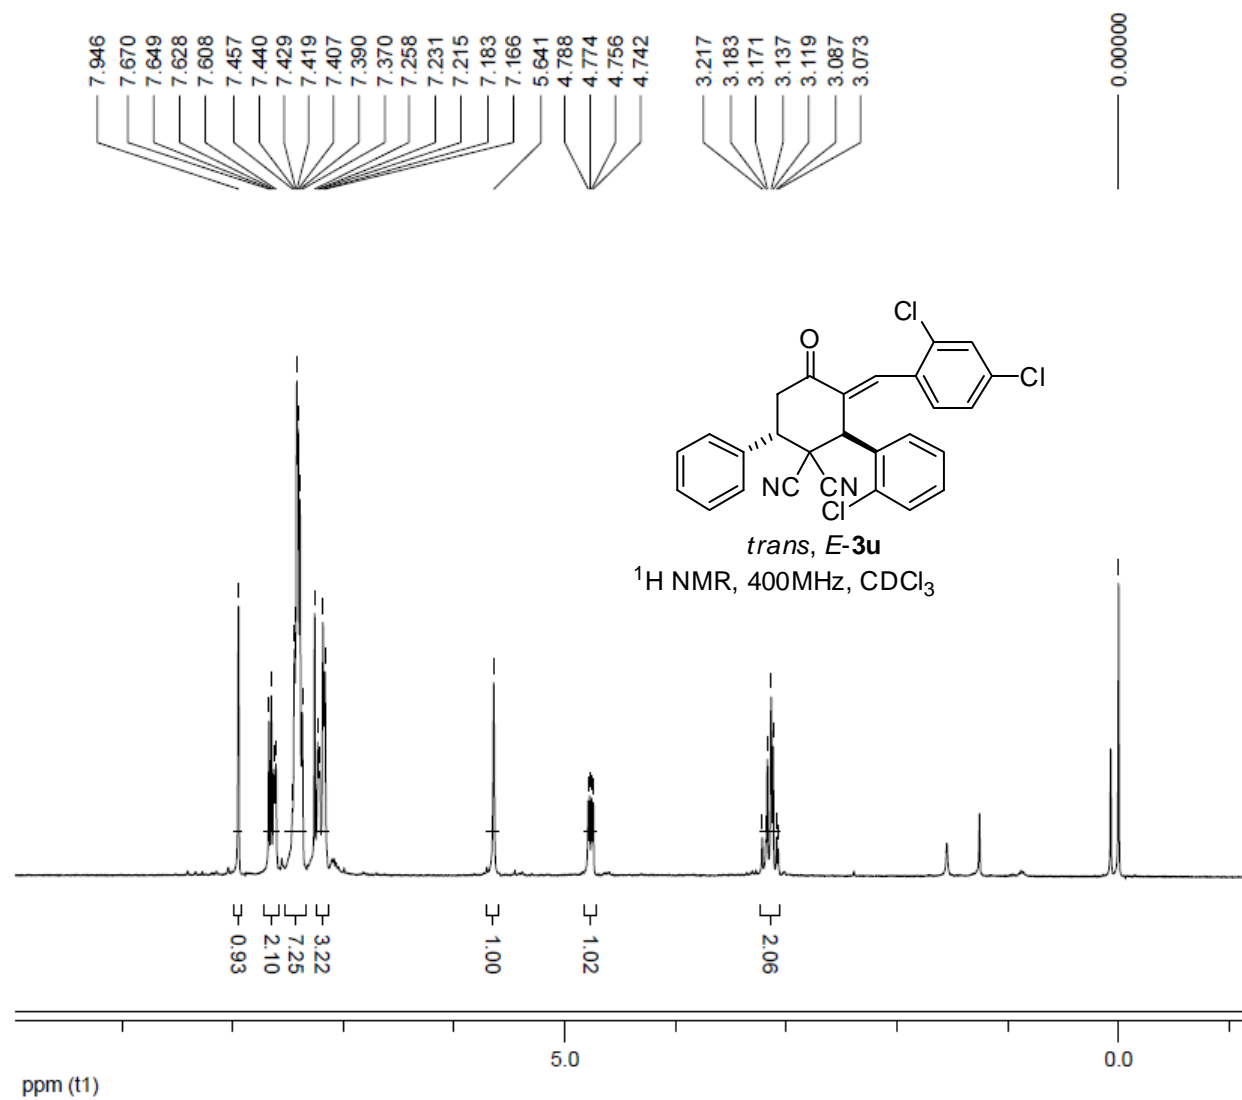

Date:  
5 Jul 2011  
Document's Title:  
n  
Spectrum Title:  
PROTON  
Frequency (MHz):  
(f1) 400.230  
Original Points Count:  
(f1) 32768  
Actual Points Count:  
(f1) 32768  
Acquisition Time (sec):  
(f1) 3.9846  
Spectral Width (ppm):  
(f1) 20.547  
Pulse Program:  
Unknown

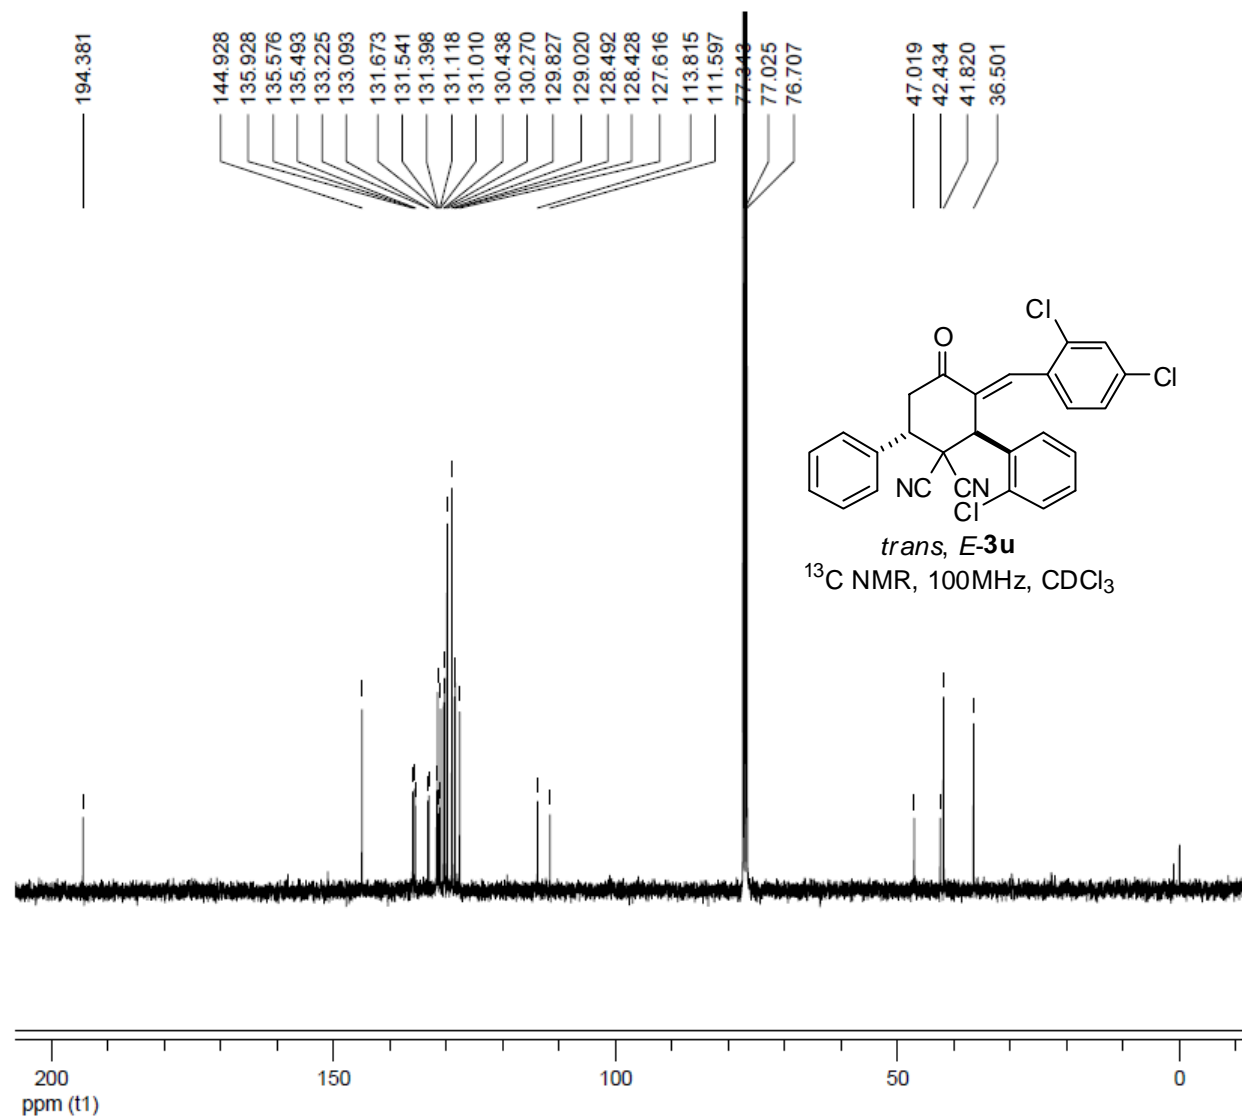

Date:  
5 Jul 2011  
Document's Title:  
nc

Spectrum Title:  
C13CPD

Frequency (MHz):  
(f1) 100.638  
Original Points Count:  
(f1) 32768  
Actual Points Count:  
(f1) 32768  
Acquisition Time (sec):  
(f1) 1.1010  
Spectral Width (ppm):  
(f1) 295.733  
Pulse Program:  
Unknown

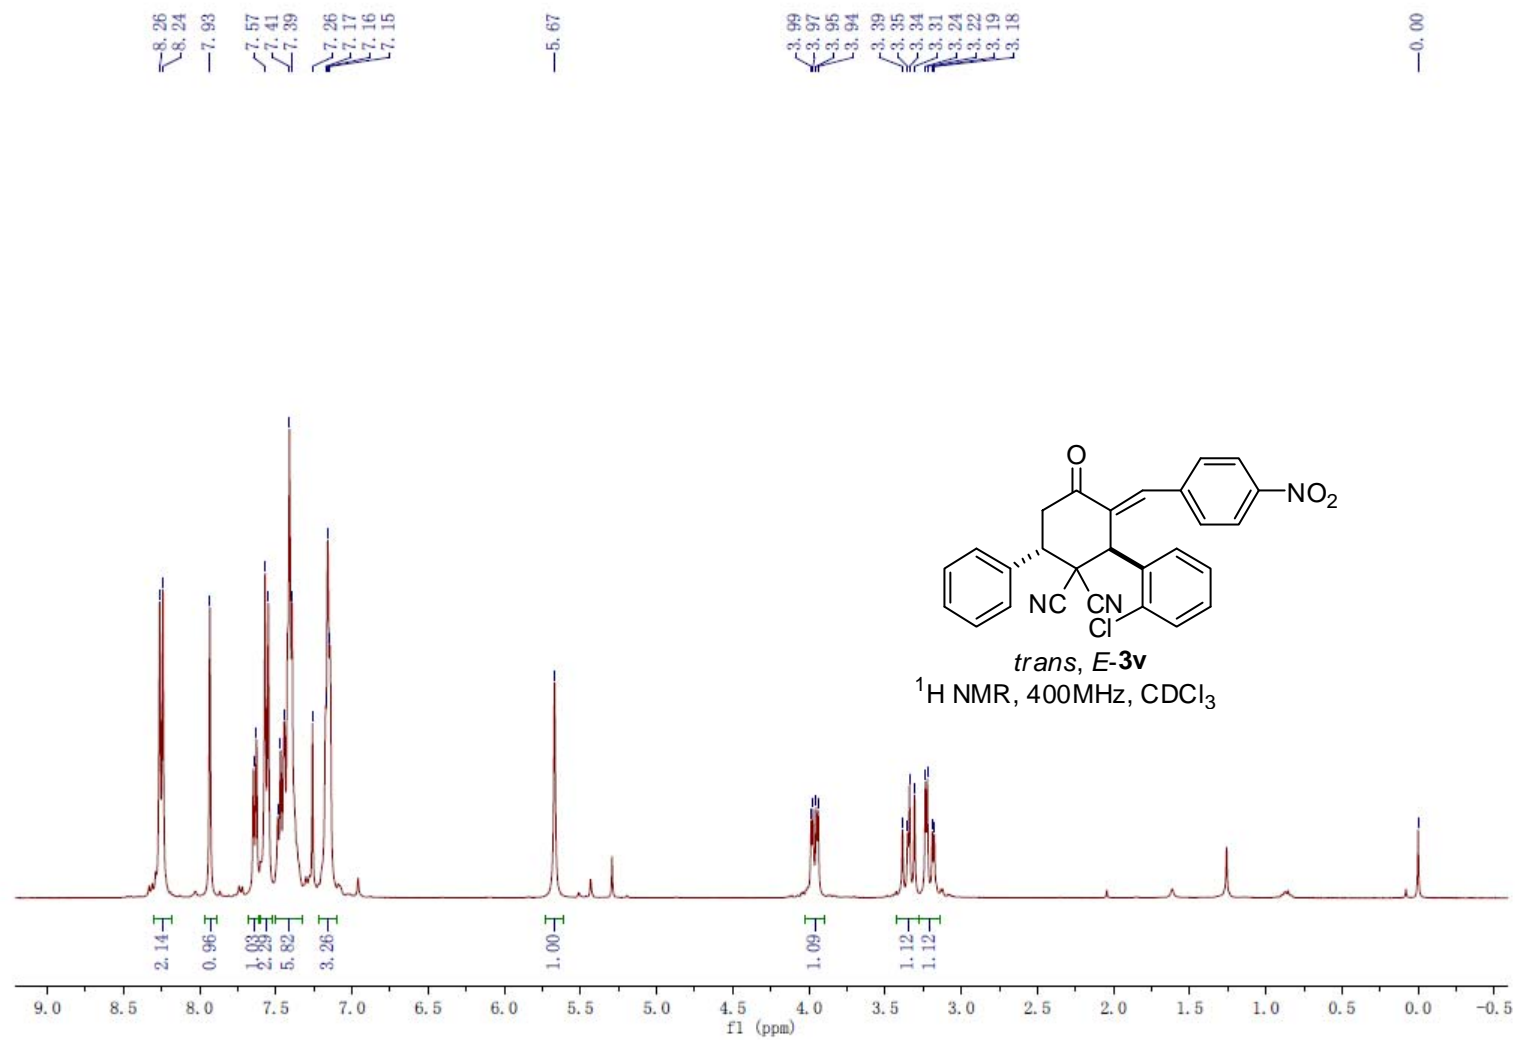

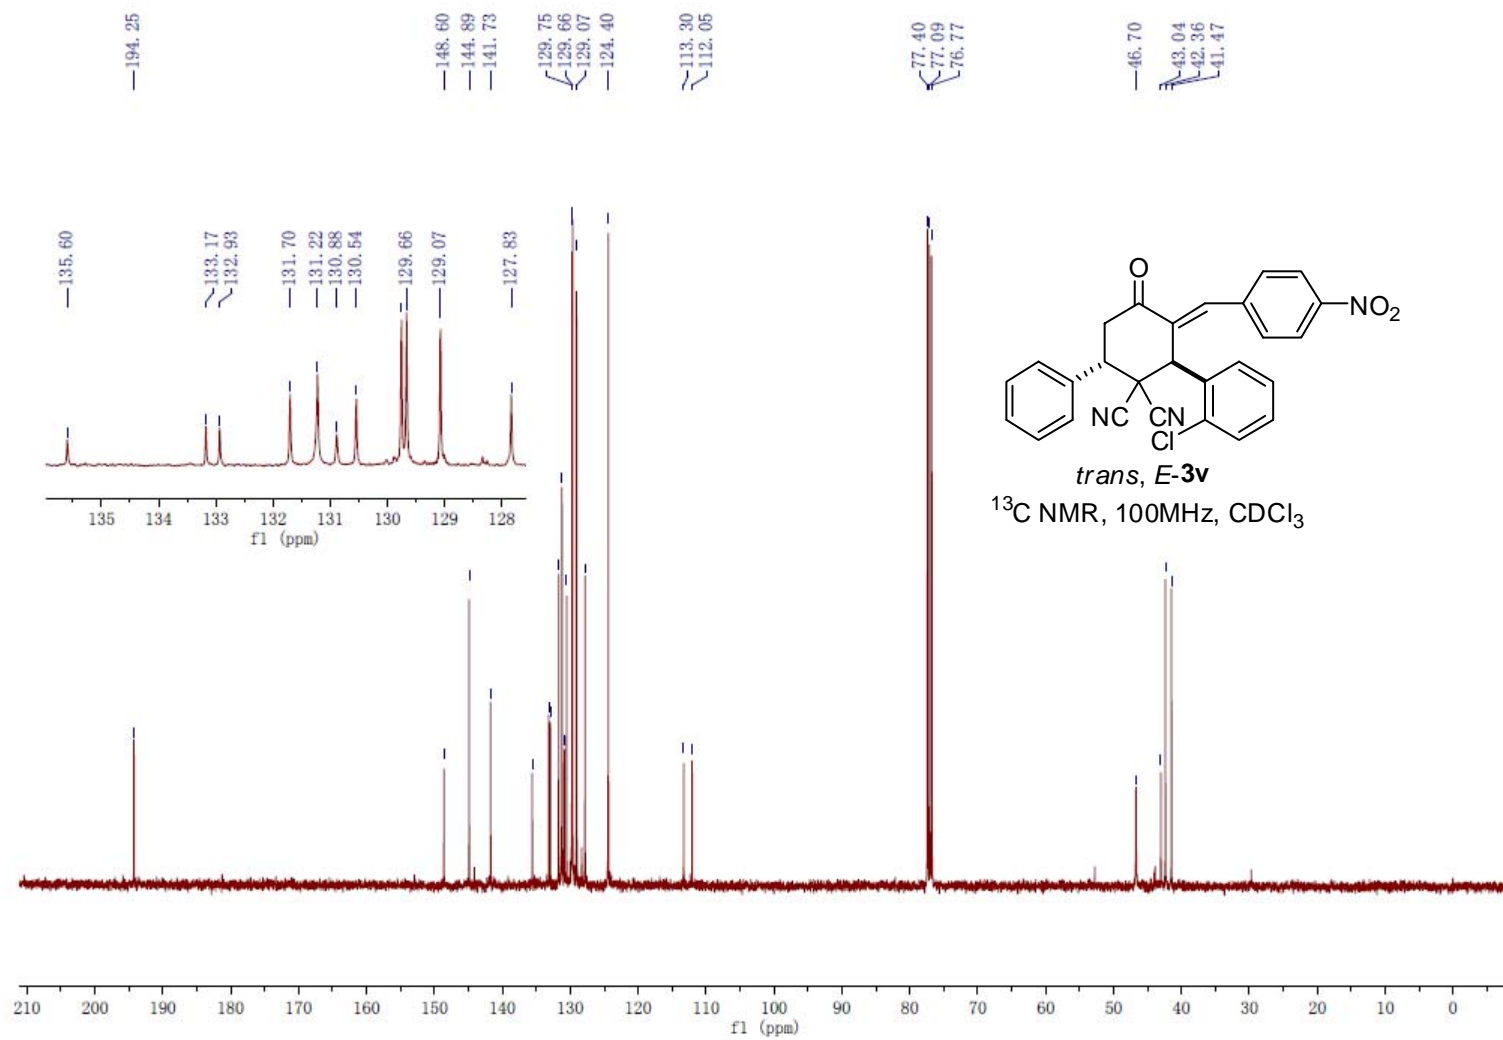

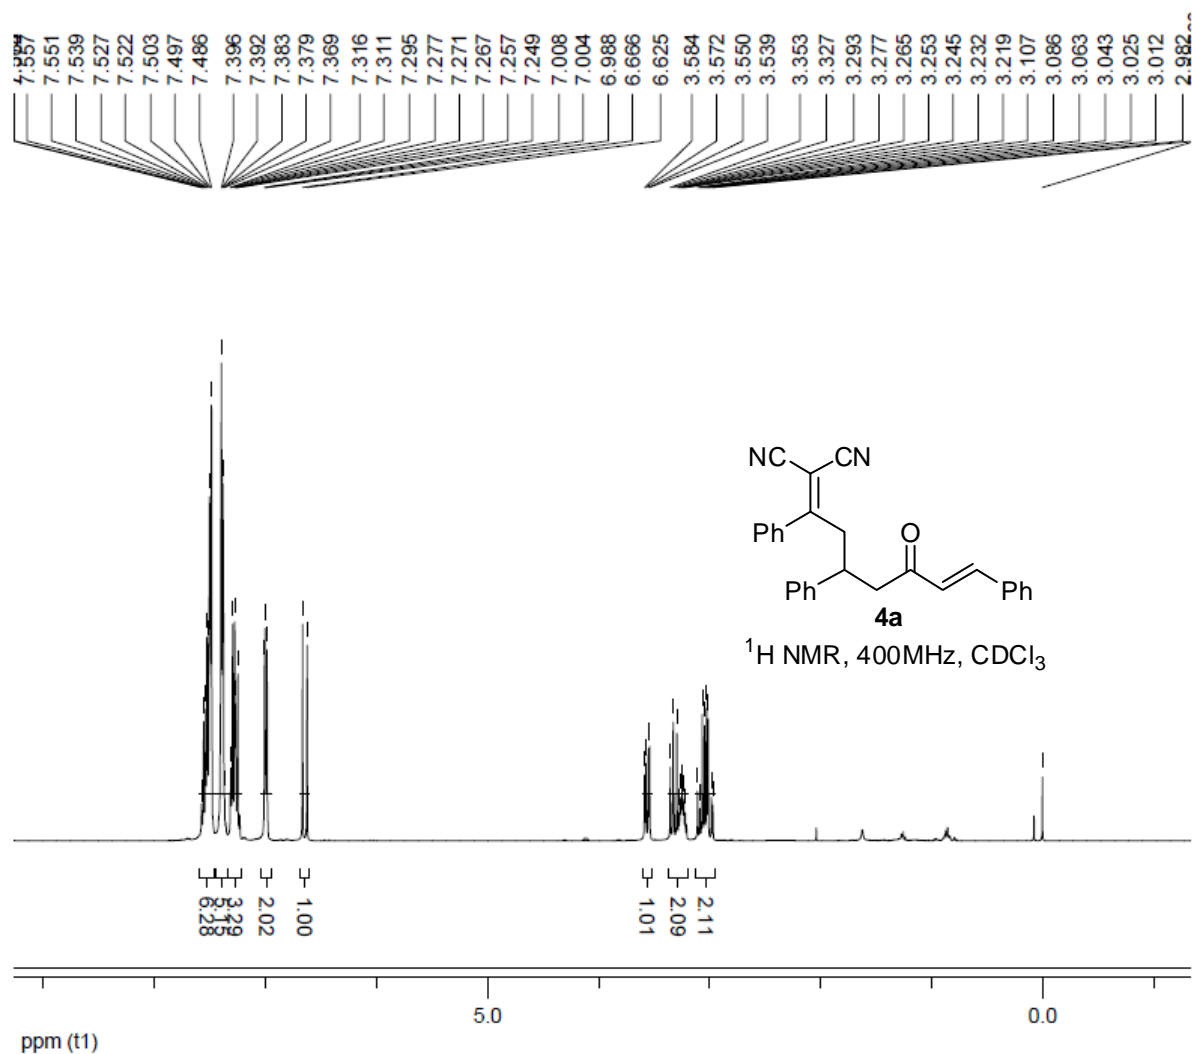

Date:

5 Jul 2011

Document's Title:

n

Spectrum Title:

PROTON

Frequency (MHz):

(f1) 400.130

Original Points Count:

(f1) 32768

Actual Points Count:

(f1) 32768

Acquisition Time (sec):

(f1) 3.9846

Spectral Width (ppm):

(f1) 20.553

Pulse Program:

Unknown



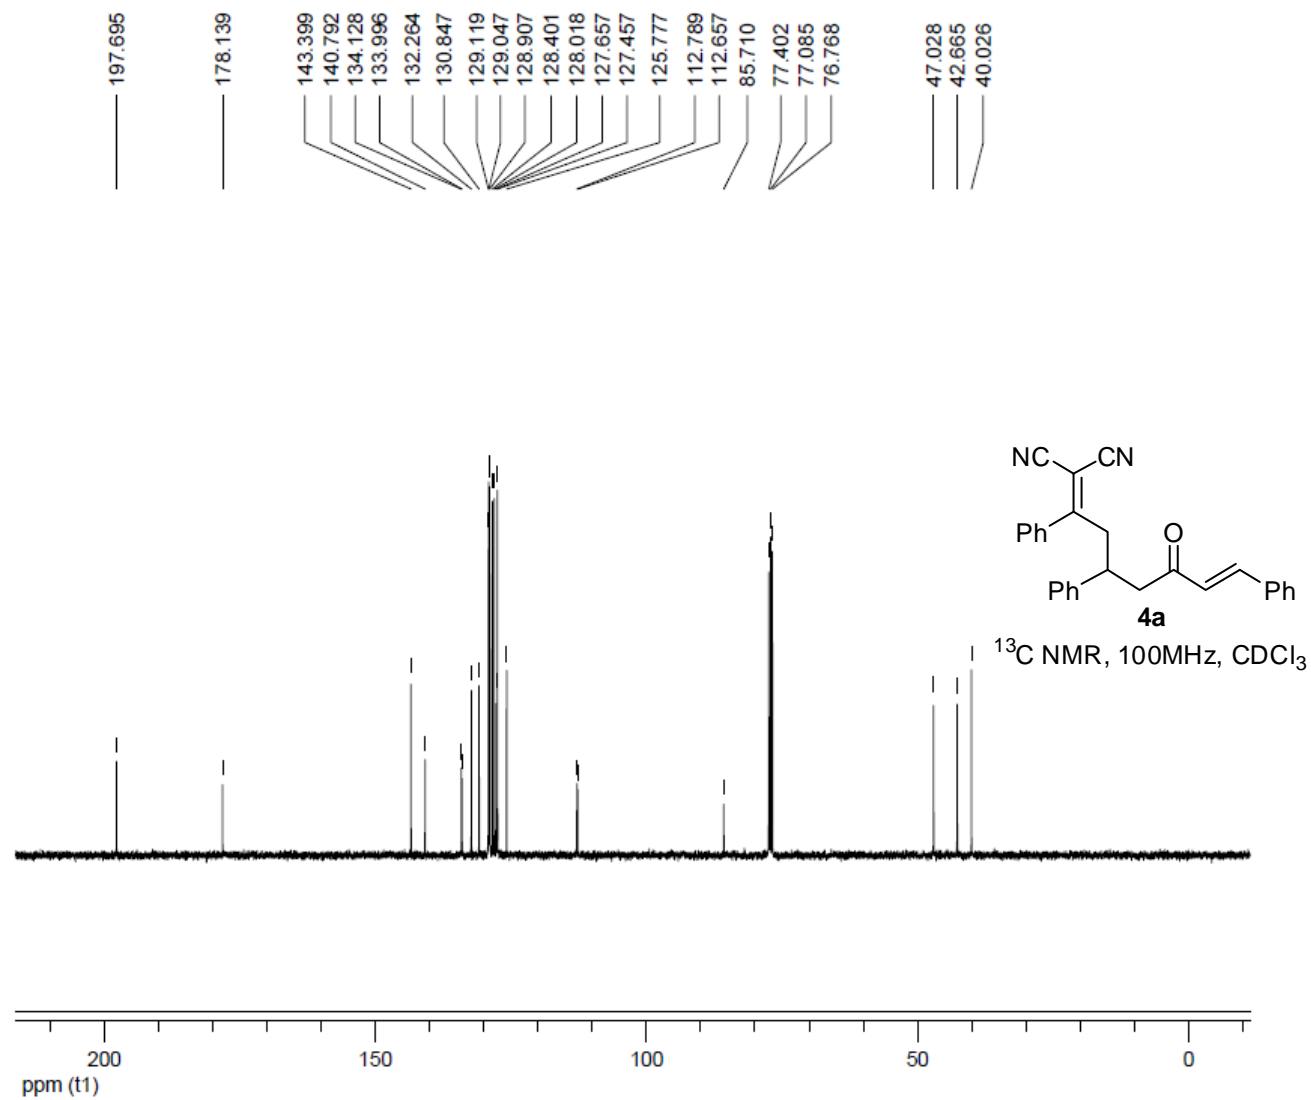

Date:  
5 Jul 2011  
Document's Title:  
nc

Spectrum Title:  
C13CPD

Frequency (MHz):  
(f1) 100.613  
Original Points Count:  
(f1) 32768  
Actual Points Count:  
(f1) 32768  
Acquisition Time (sec):  
(f1) 0.9175  
Spectral Width (ppm):  
(f1) 354.968  
Pulse Program:  
Unknown

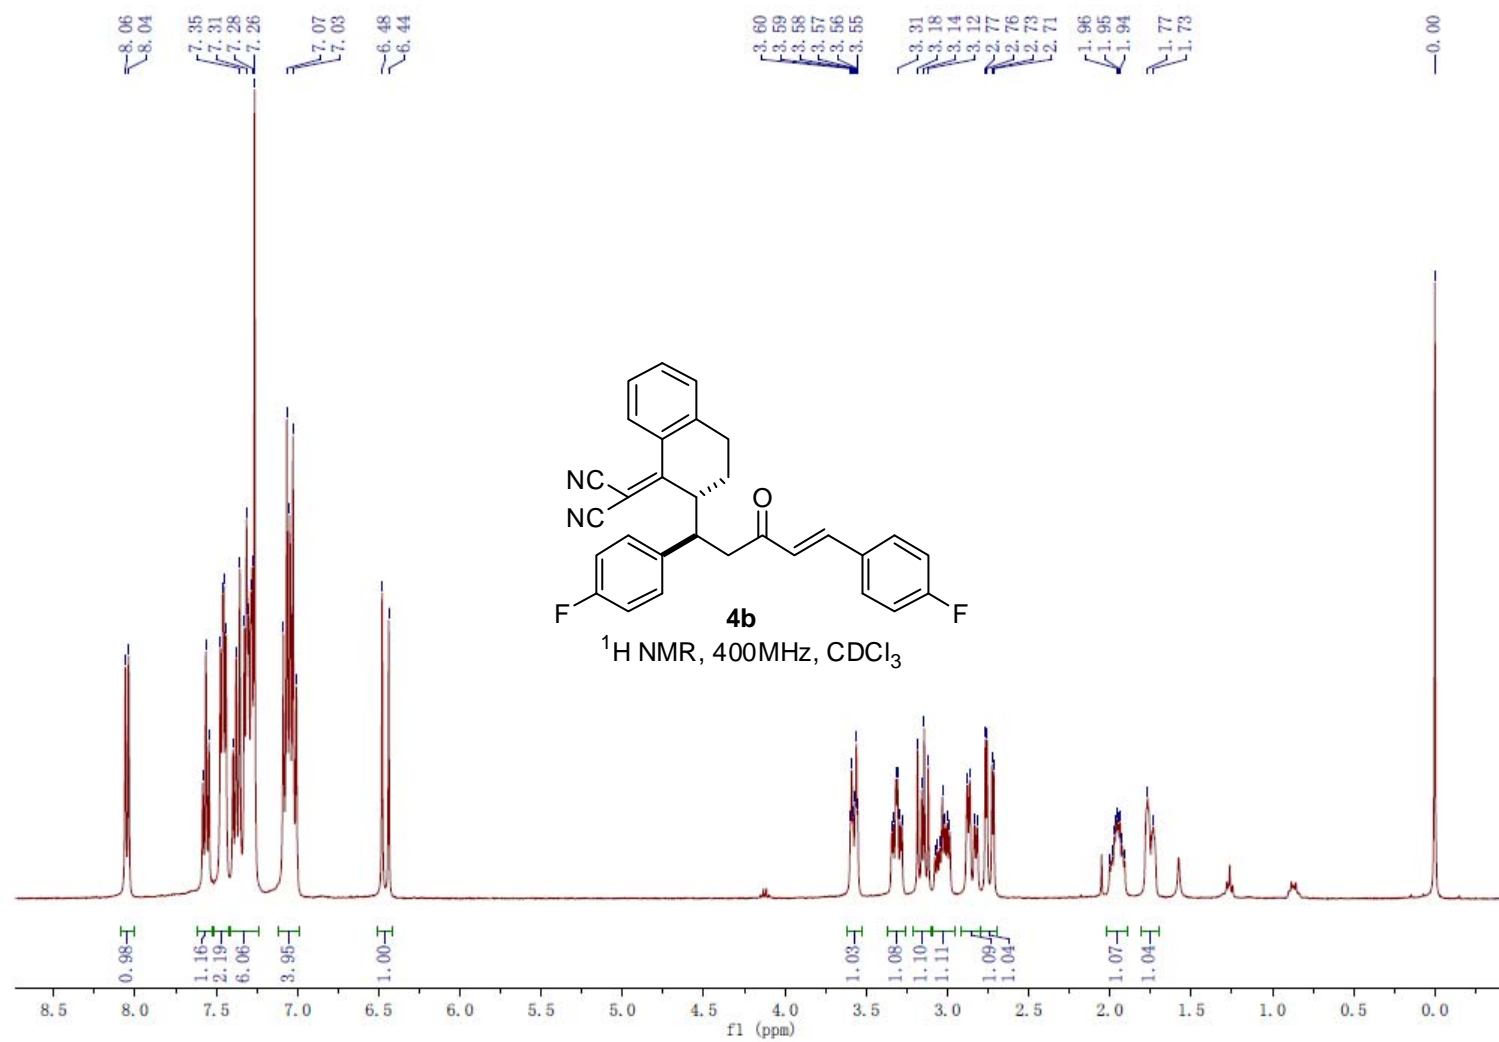

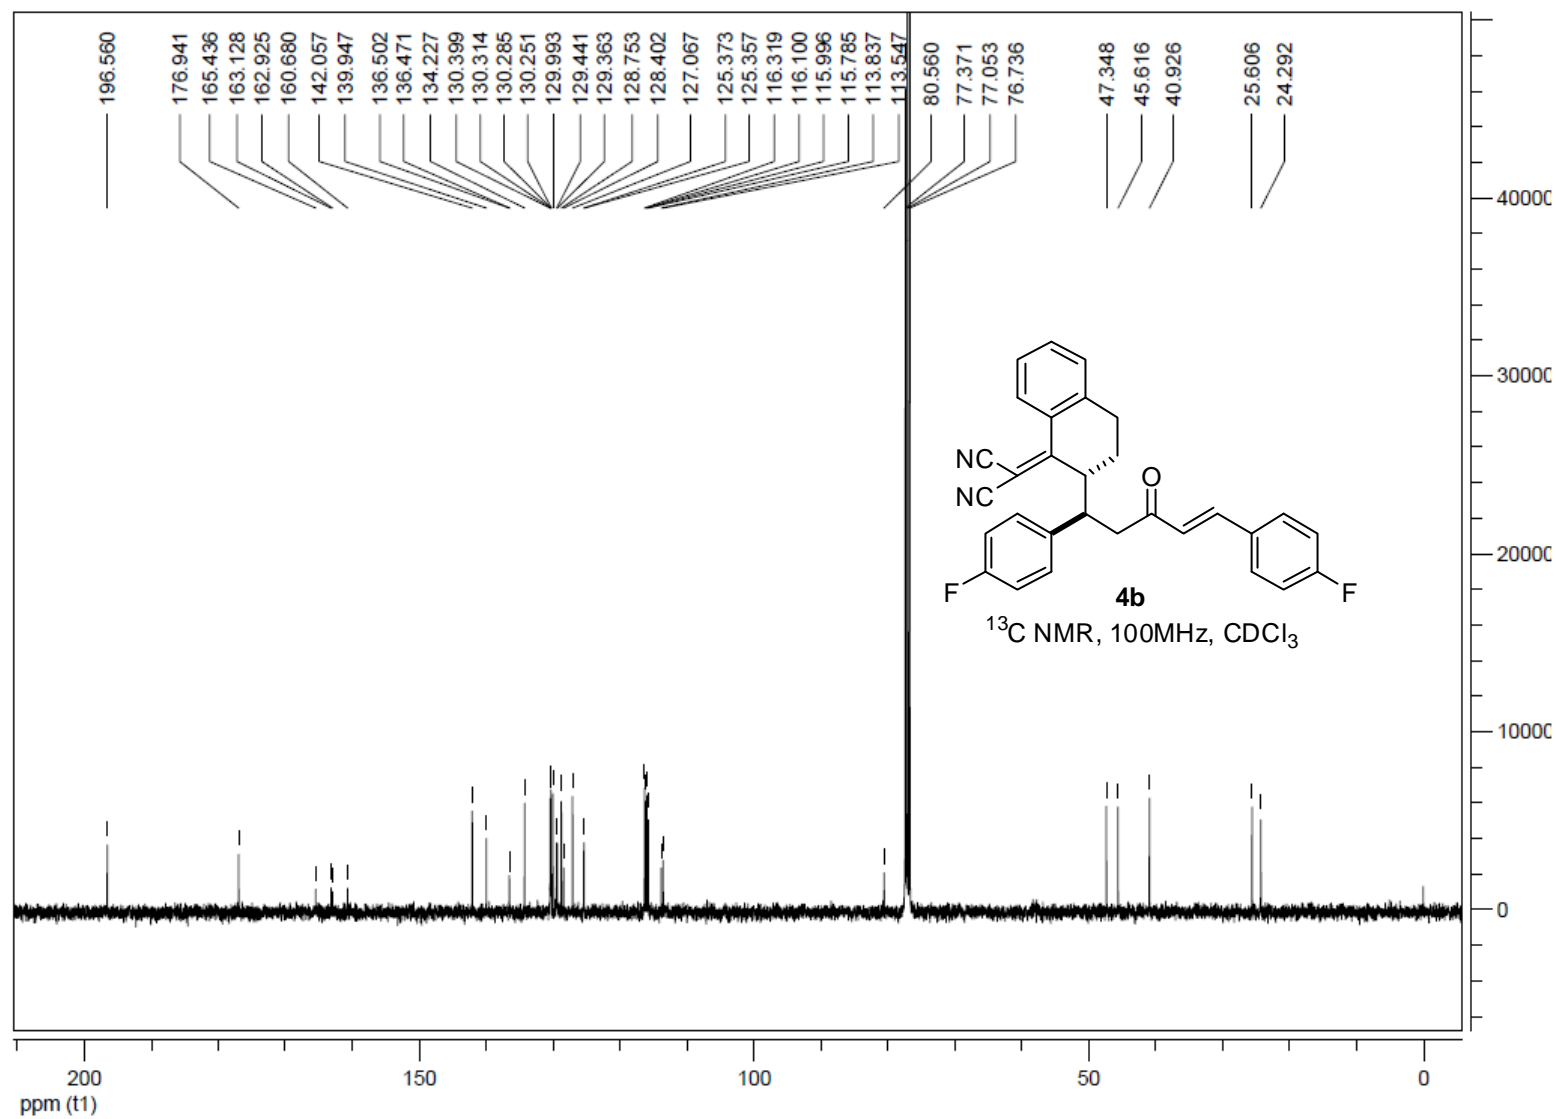

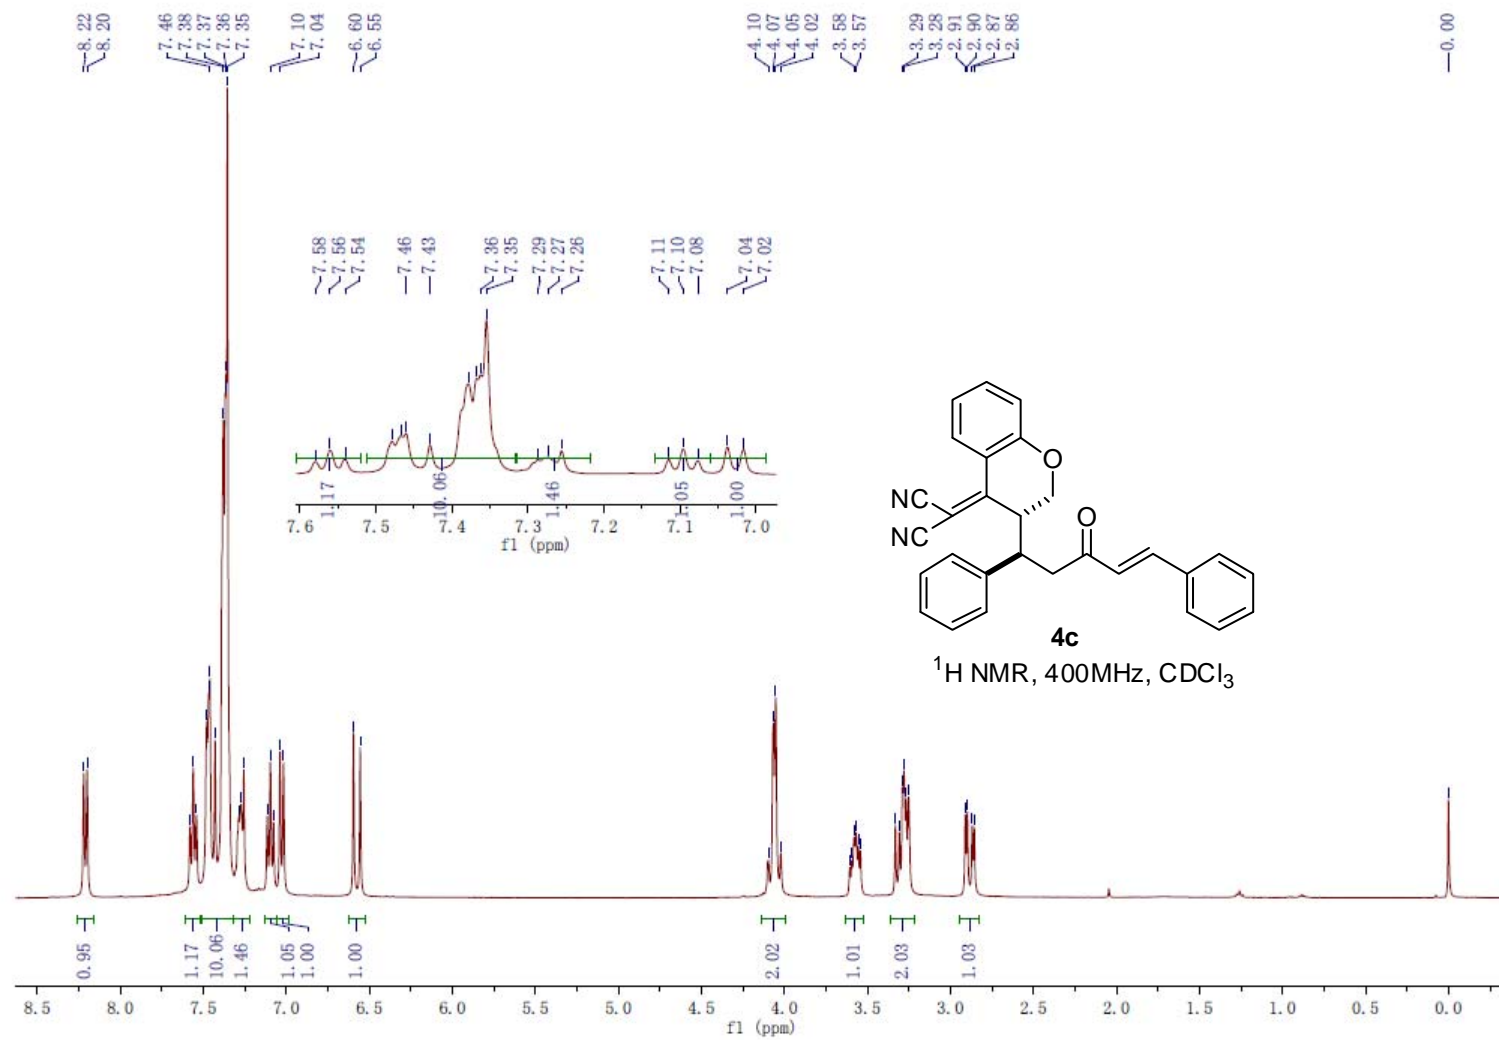

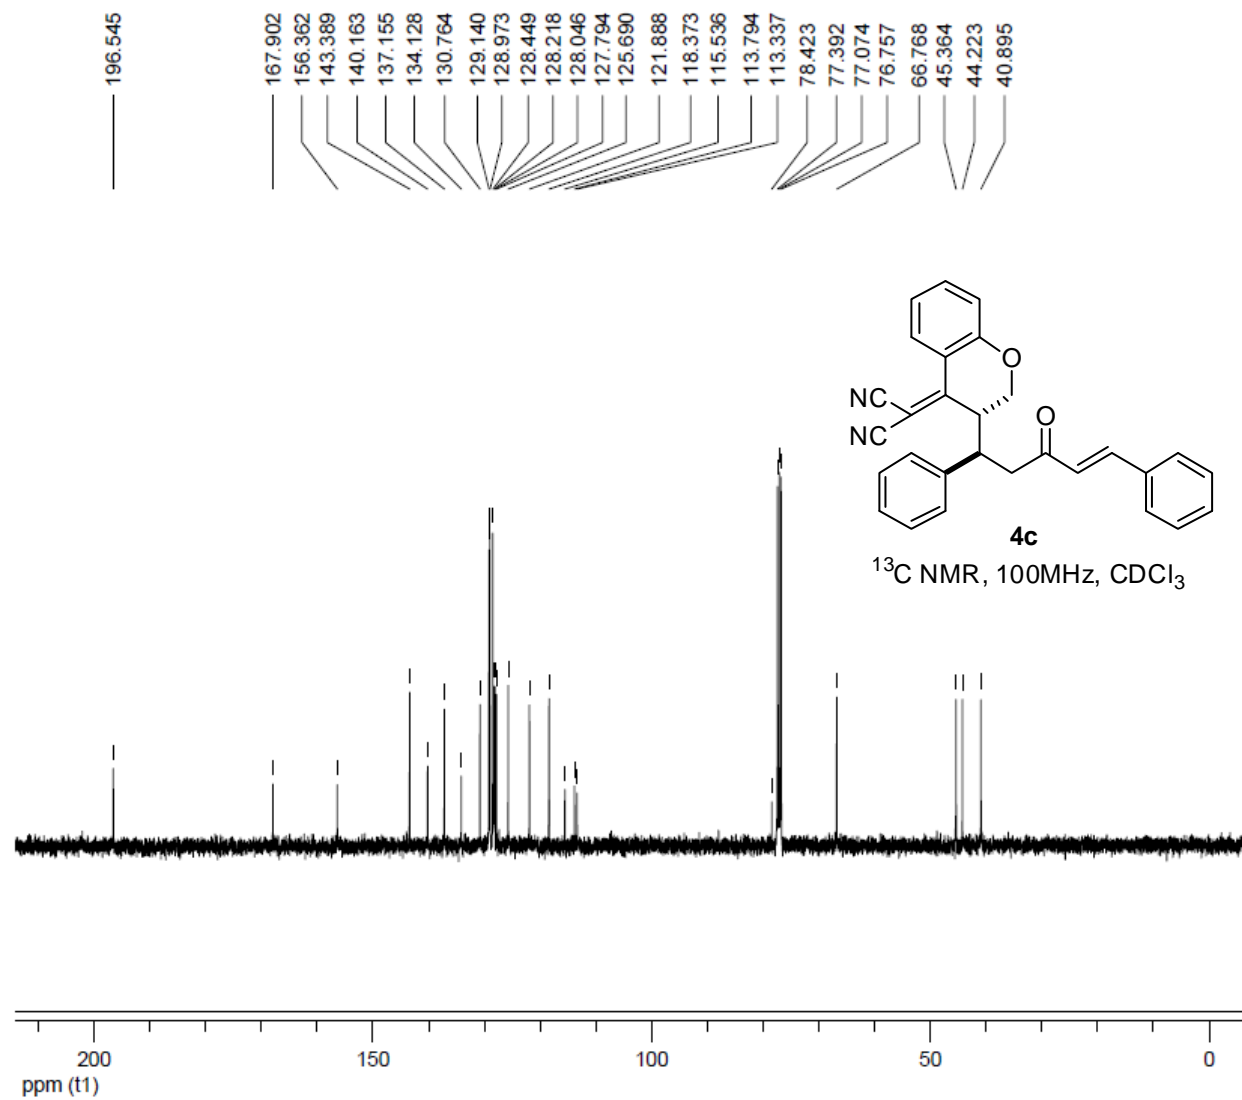

Date:  
5 Jul 2011  
Document's Title:  
nc

Spectrum Title:  
C13CPD

Frequency (MHz):  
(f1) 100.638  
Original Points Count:  
(f1) 32768  
Actual Points Count:  
(f1) 32768  
Acquisition Time (sec):  
(f1) 1.1010  
Spectral Width (ppm):  
(f1) 295.733  
Pulse Program:  
Unknown

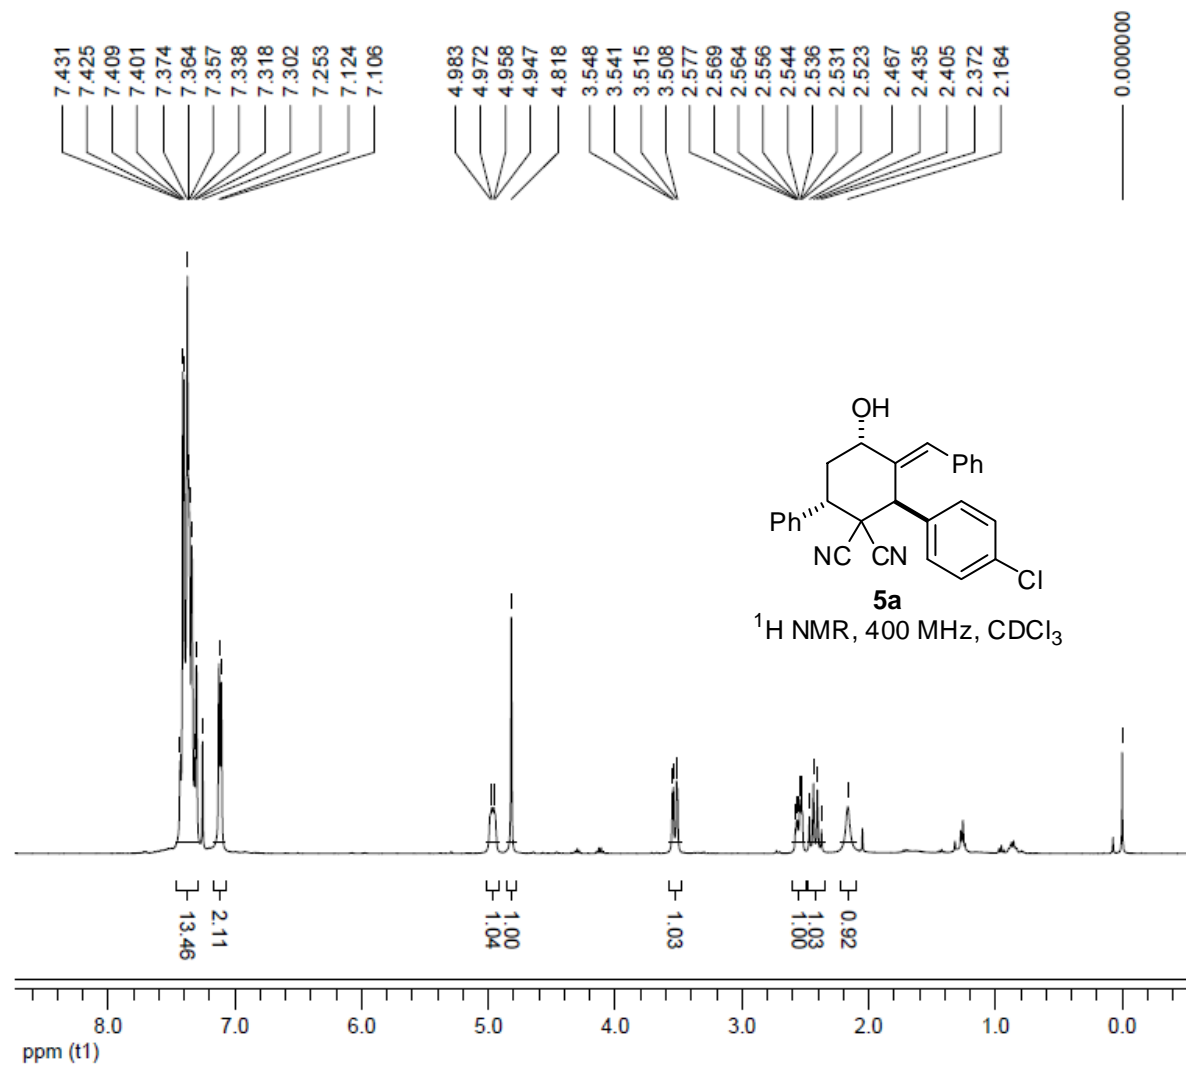

Date:  
13 Sep 2011  
Document's Title:  
n.mrc

Spectrum Title:  
PROTON

Frequency (MHz):  
(f1) 400.130  
Original Points Count:  
(f1) 32768  
Actual Points Count:  
(f1) 32768  
Acquisition Time (sec):  
(f1) 3.9846  
Spectral Width (ppm):  
(f1) 20.553  
Pulse Program:  
Unknown

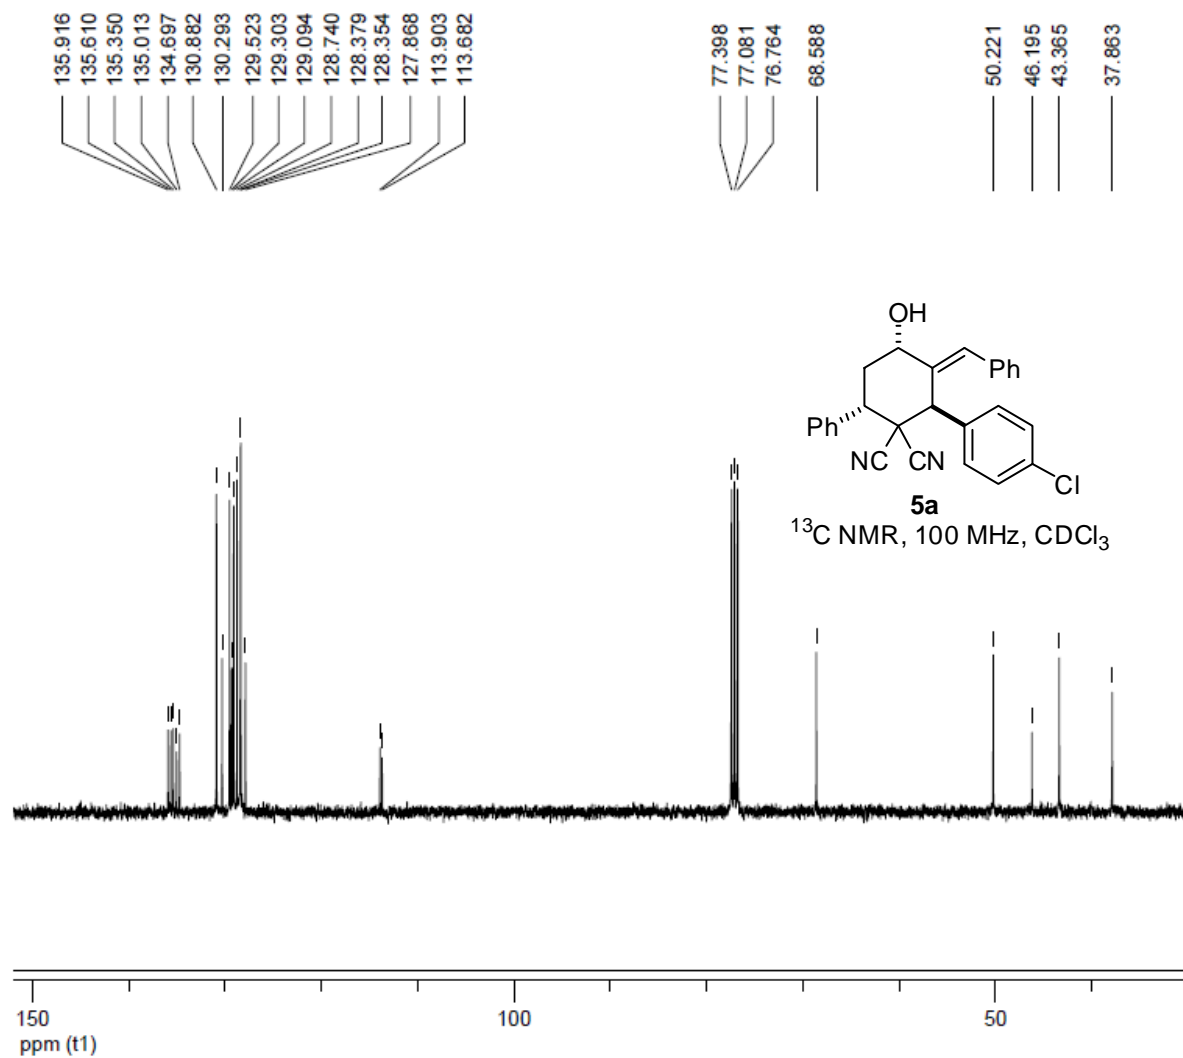

Date:

13 Sep 2011

Document's Title:

n.mrc

Spectrum Title:

C13CPD

Frequency (MHz):

(f1) 100.638

Original Points Count:

(f1) 32768

Actual Points Count:

(f1) 32768

Acquisition Time (sec):

(f1) 1.1010

Spectral Width (ppm):

(f1) 295.733

Pulse Program:

Unknown

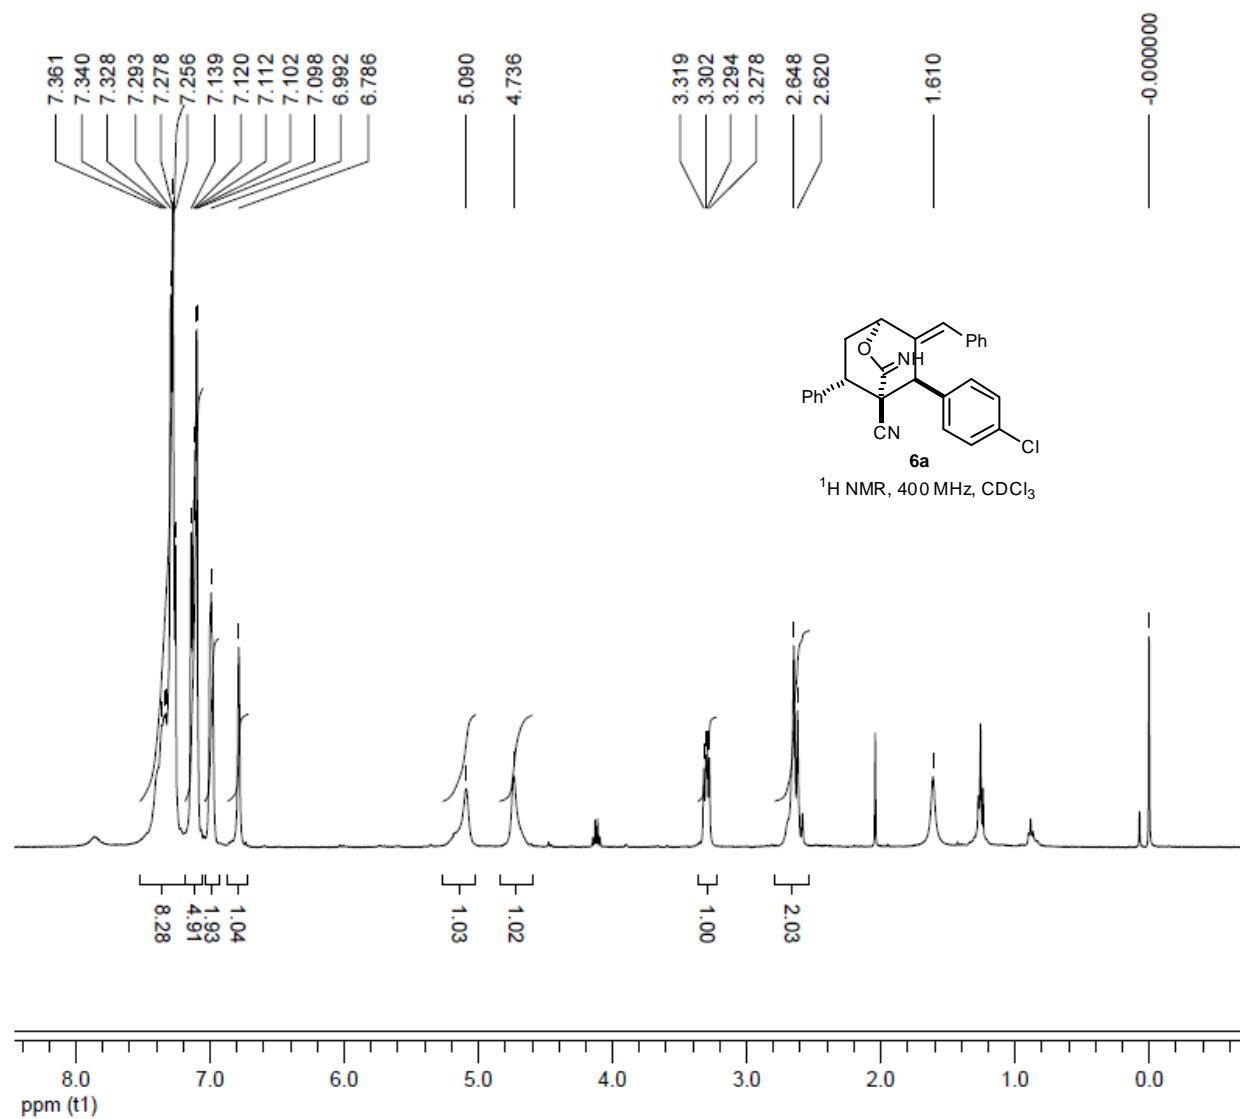

Date:  
13 Sep 2011  
Document's Title:  
n  
Spectrum Title:  
PROTON  
Frequency (MHz):  
(f1) 400.130  
Original Points Count:  
(f1) 32768  
Actual Points Count:  
(f1) 32768  
Acquisition Time (sec):  
(f1) 3.9846  
Spectral Width (ppm):  
(f1) 20.553  
Pulse Program:  
Unknown



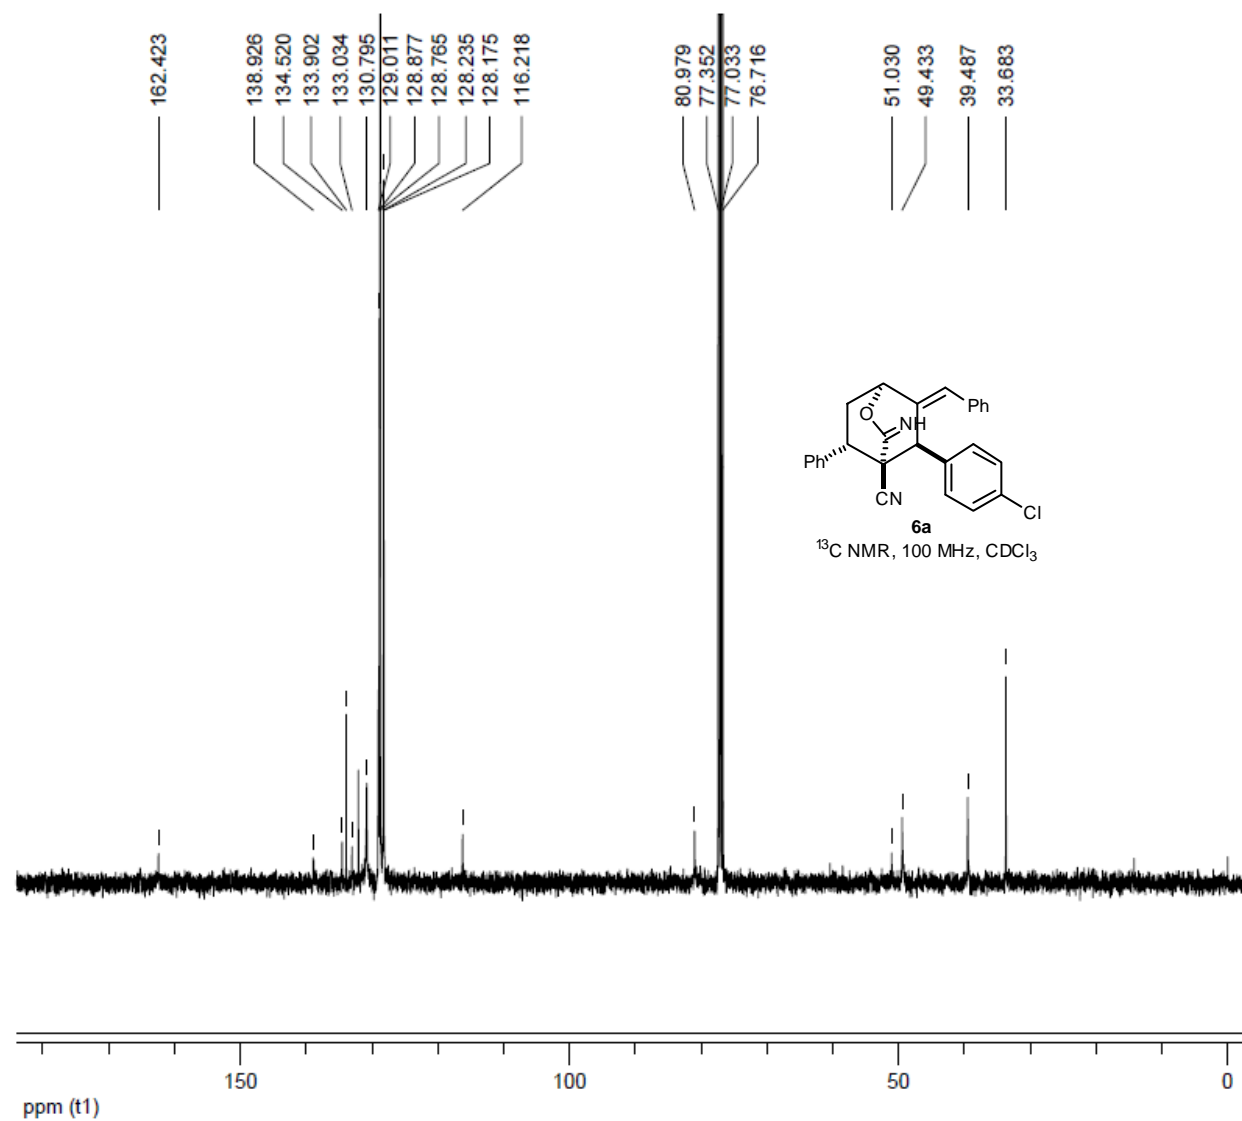

Date:  
13 Sep 2011  
Document's Title:  
n

Spectrum Title:  
C13CPD

Frequency (MHz):  
(f1) 100.613  
Original Points Count:  
(f1) 32768  
Actual Points Count:  
(f1) 32768  
Acquisition Time (sec):  
(f1) 0.9175  
Spectral Width (ppm):  
(f1) 354.968  
Pulse Program:  
Unknown

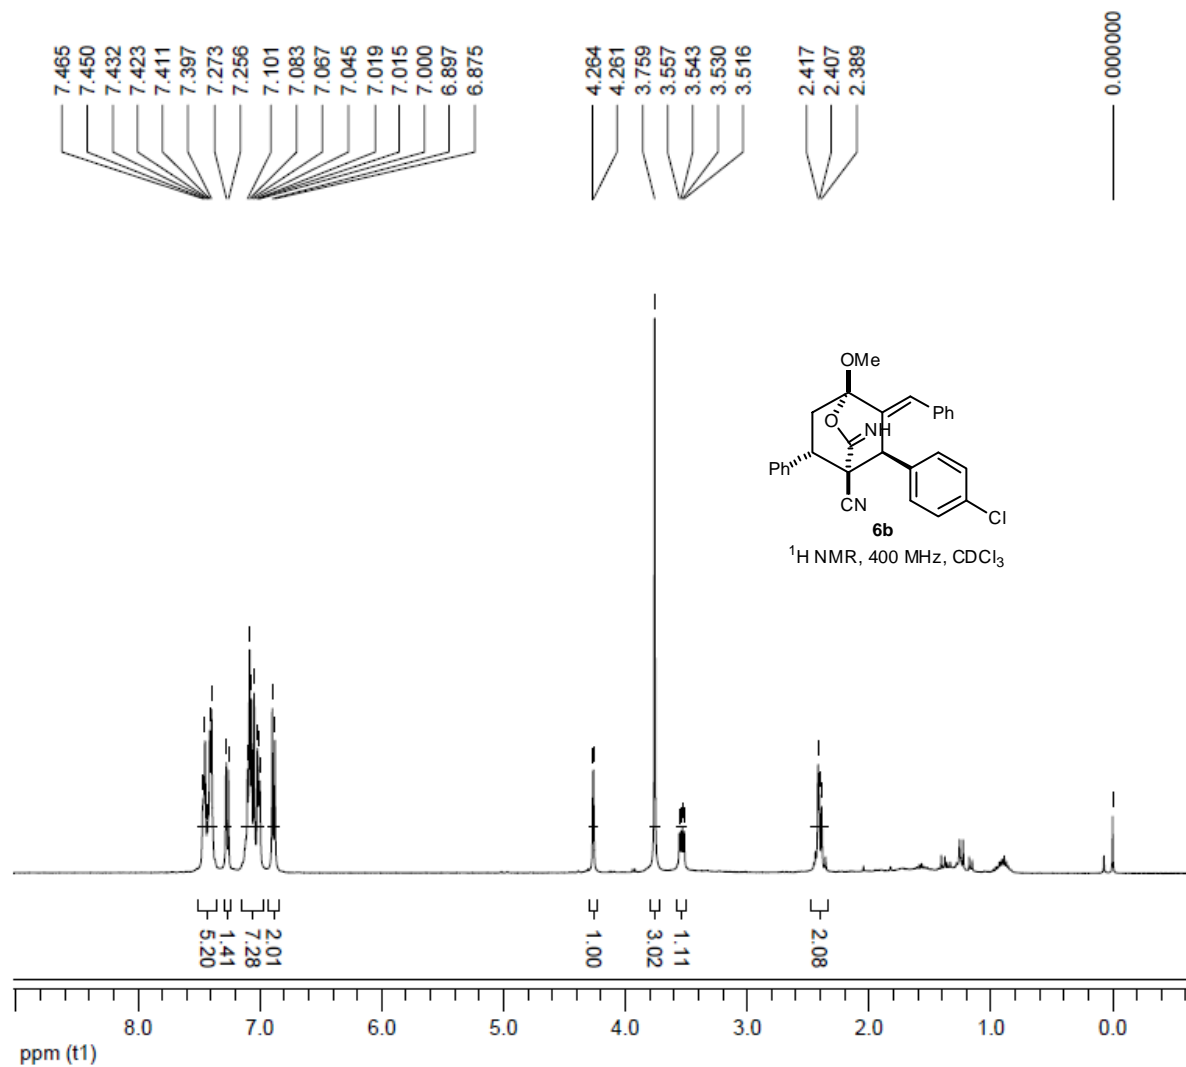

Date:

13 Sep 2011

Document's Title:

n

Spectrum Title:

PROTON

Frequency (MHz):

(f1) 400.230

Original Points Count:

(f1) 32768

Actual Points Count:

(f1) 32768

Acquisition Time (sec):

(f1) 3.9846

Spectral Width (ppm):

(f1) 20.547

Pulse Program:

Unknown

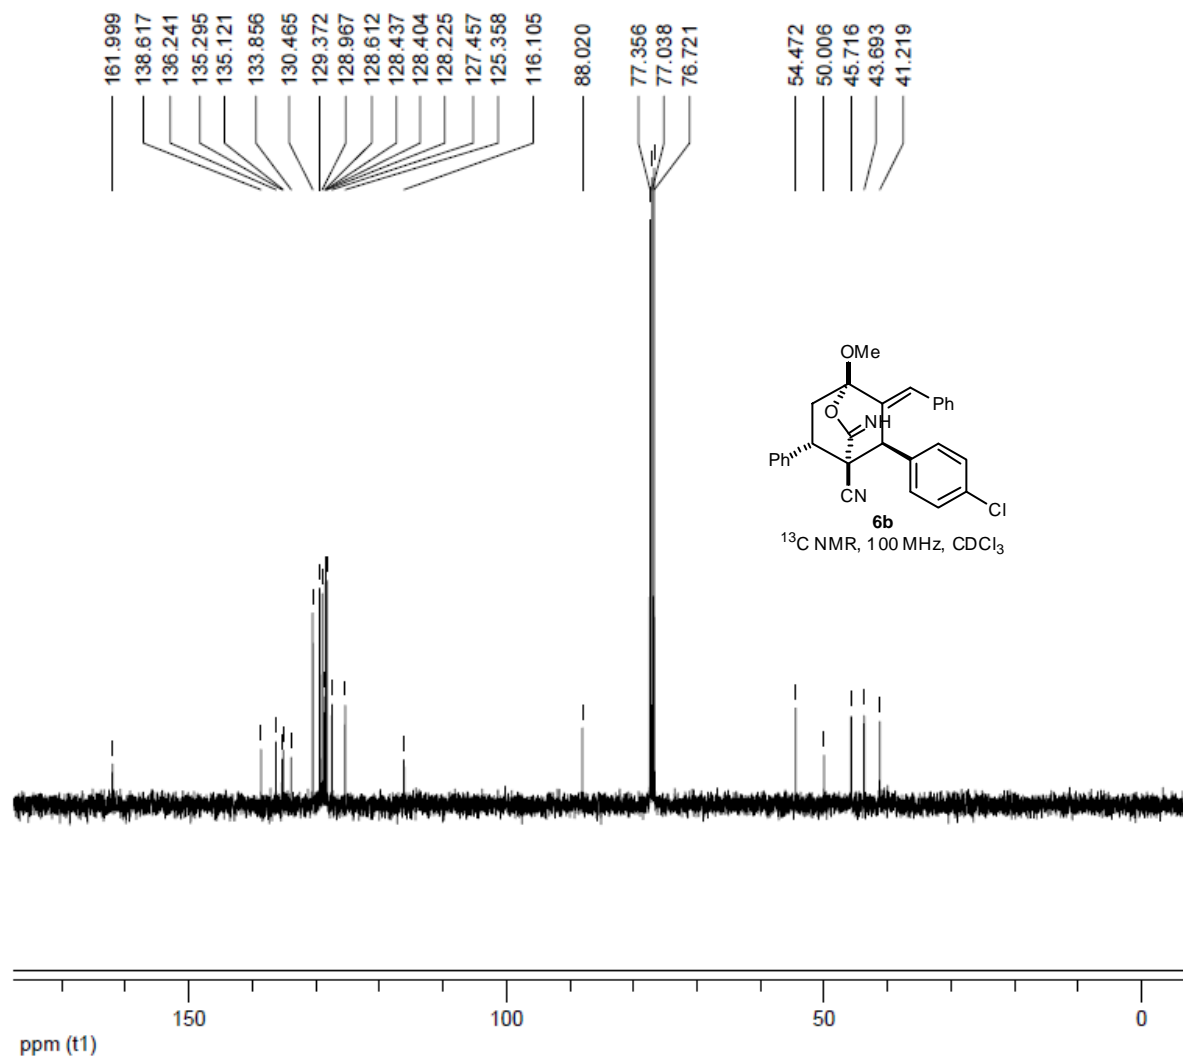

Date:

13 Sep 2011

Document's Title:

n

Spectrum Title:

C13CPD

Frequency (MHz):

(f1) 100.638

Original Points Count:

(f1) 32768

Actual Points Count:

(f1) 32768

Acquisition Time (sec):

(f1) 1.1010

Spectral Width (ppm):

(f1) 295.733

Pulse Program:

Unknown

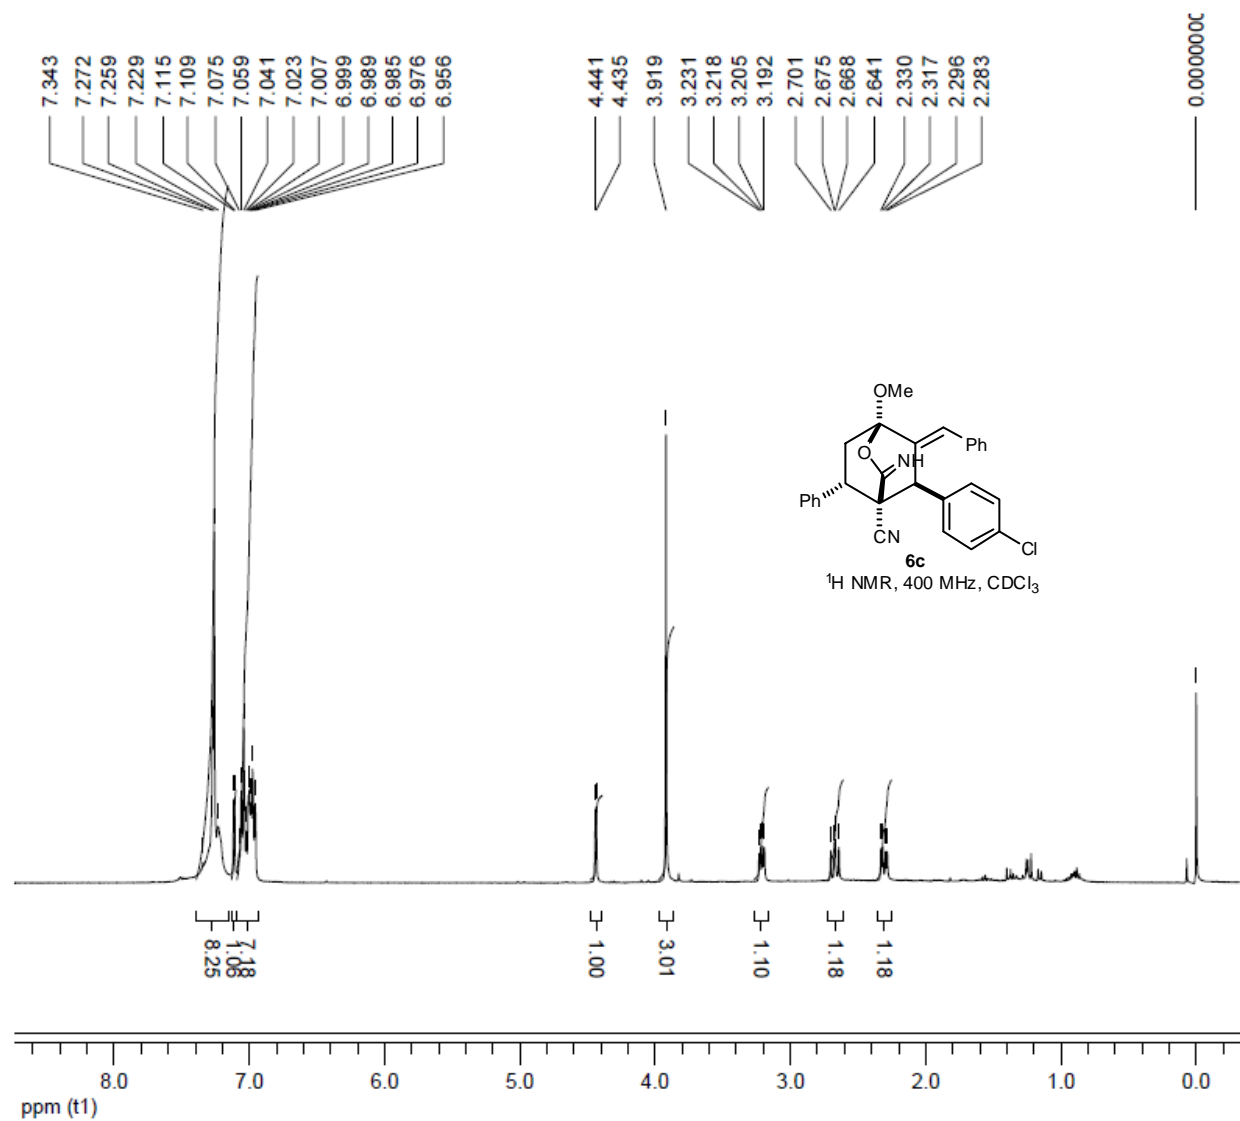

Date:  
13 Sep 2011  
Document's Title:  
n

Spectrum Title:  
PROTON

Frequency (MHz):  
(f1) 400.130  
Original Points Count:  
(f1) 32768  
Actual Points Count:  
(f1) 32768  
Acquisition Time (sec):  
(f1) 3.9846  
Spectral Width (ppm):  
(f1) 20.553  
Pulse Program:  
Unknown

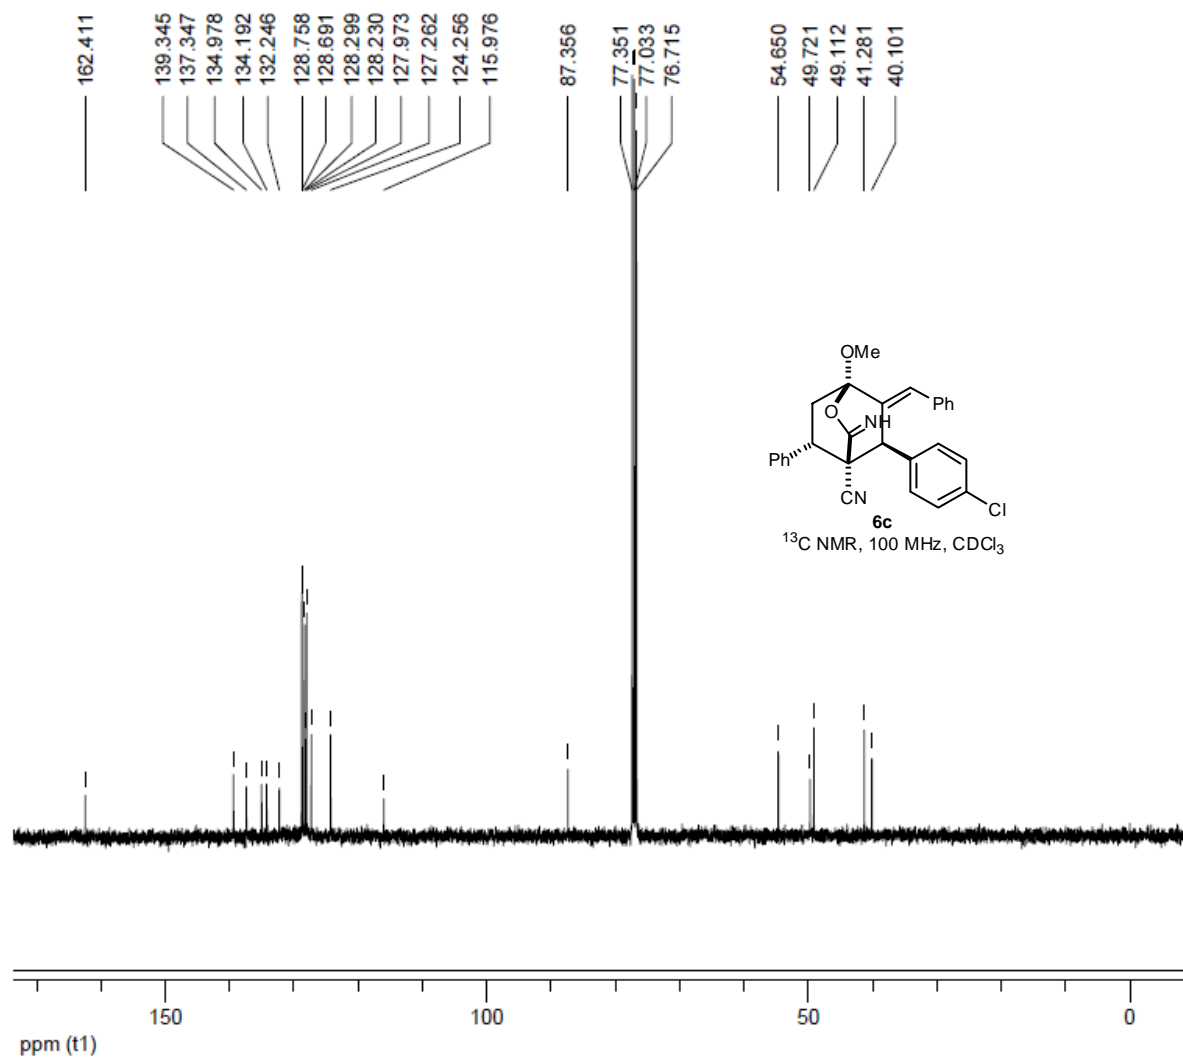

Date:

13 Sep 2011

Document's Title:

n

Spectrum Title:

C13CPD

Frequency (MHz):

(f1) 100.638

Original Points Count:

(f1) 32768

Actual Points Count:

(f1) 32768

Acquisition Time (sec):

(f1) 1.1010

Spectral Width (ppm):

(f1) 295.733

Pulse Program:

Unknown

## IV. HMQC, HMBC and NOSEY Spectra

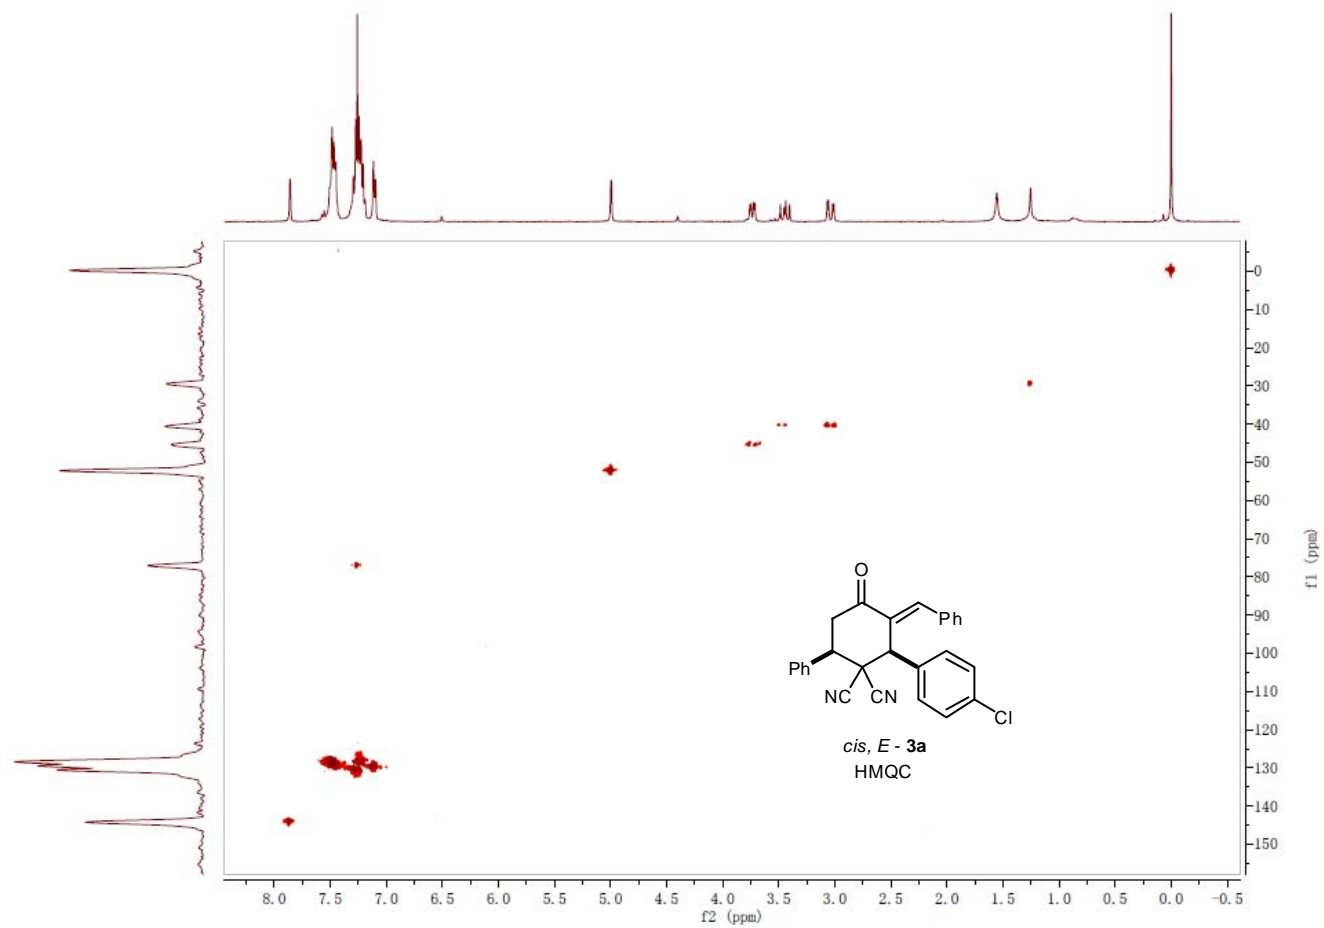

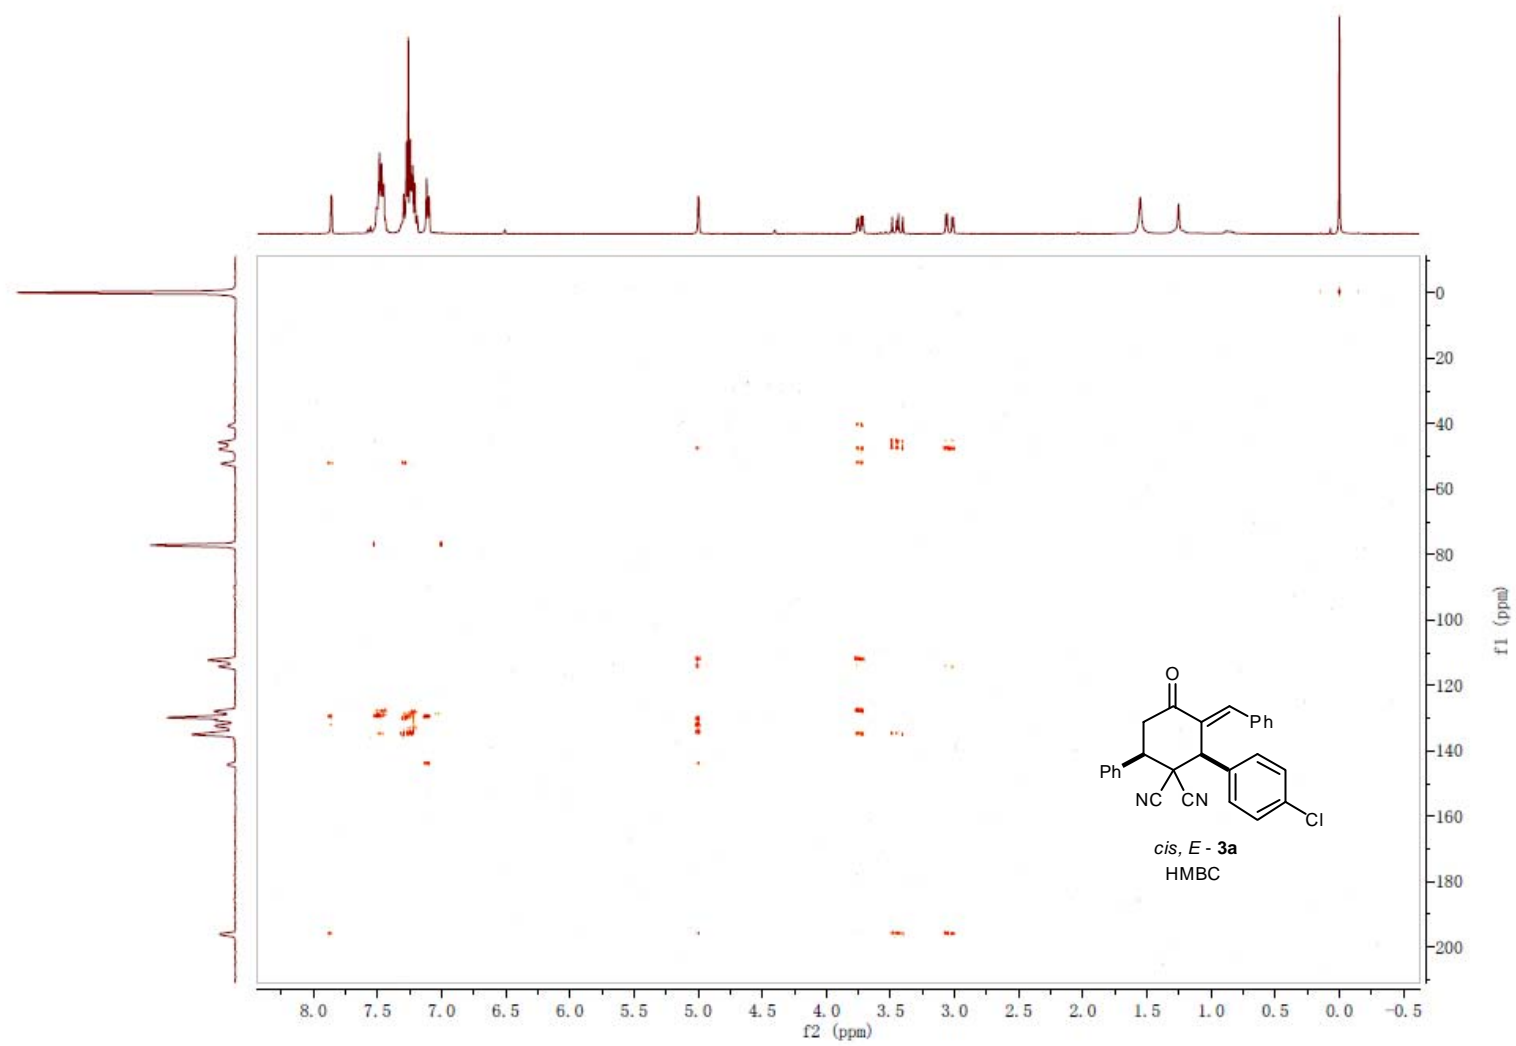

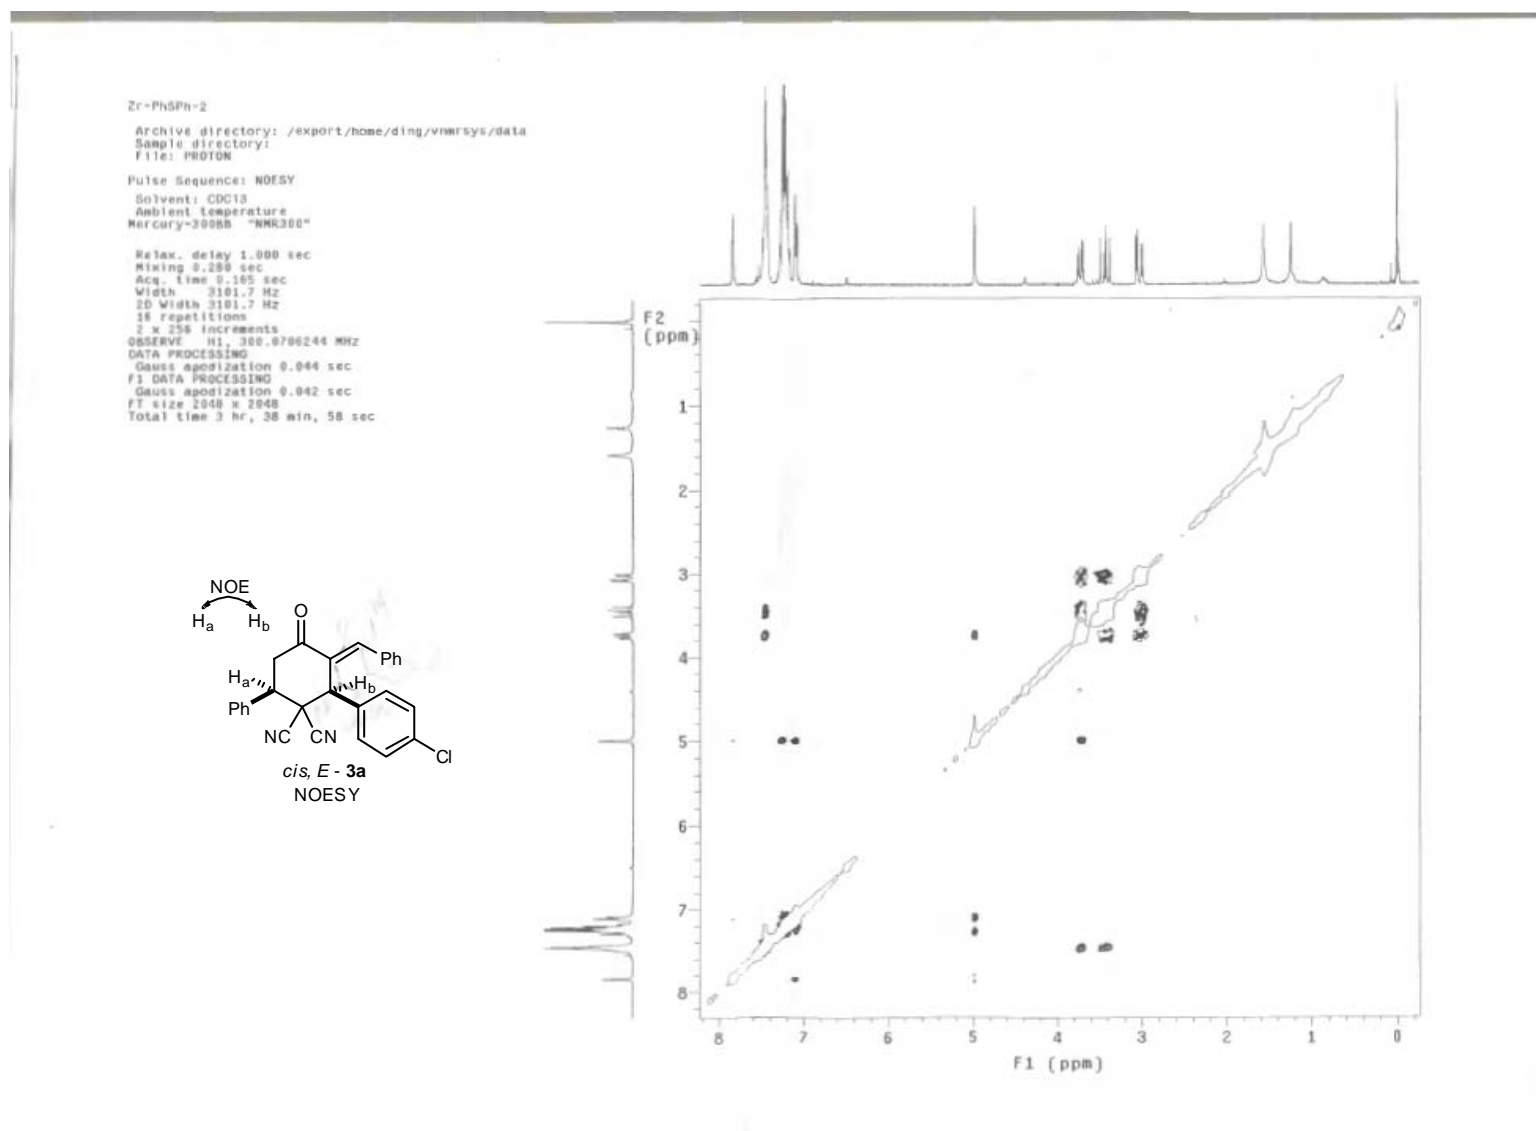



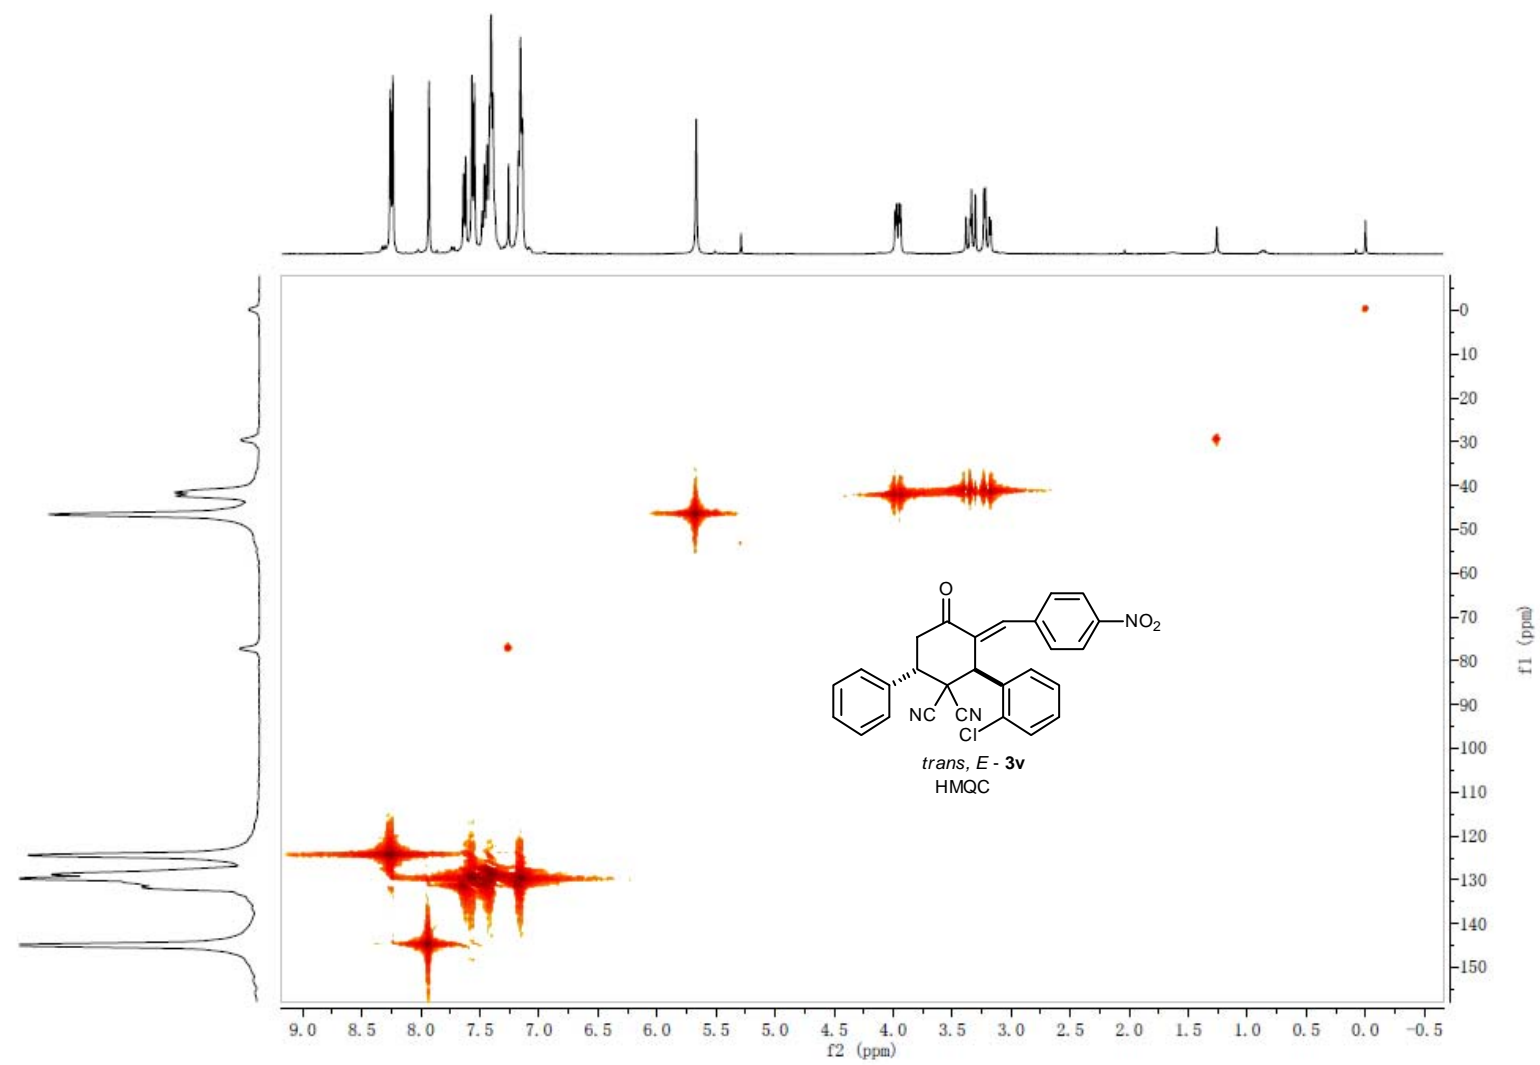

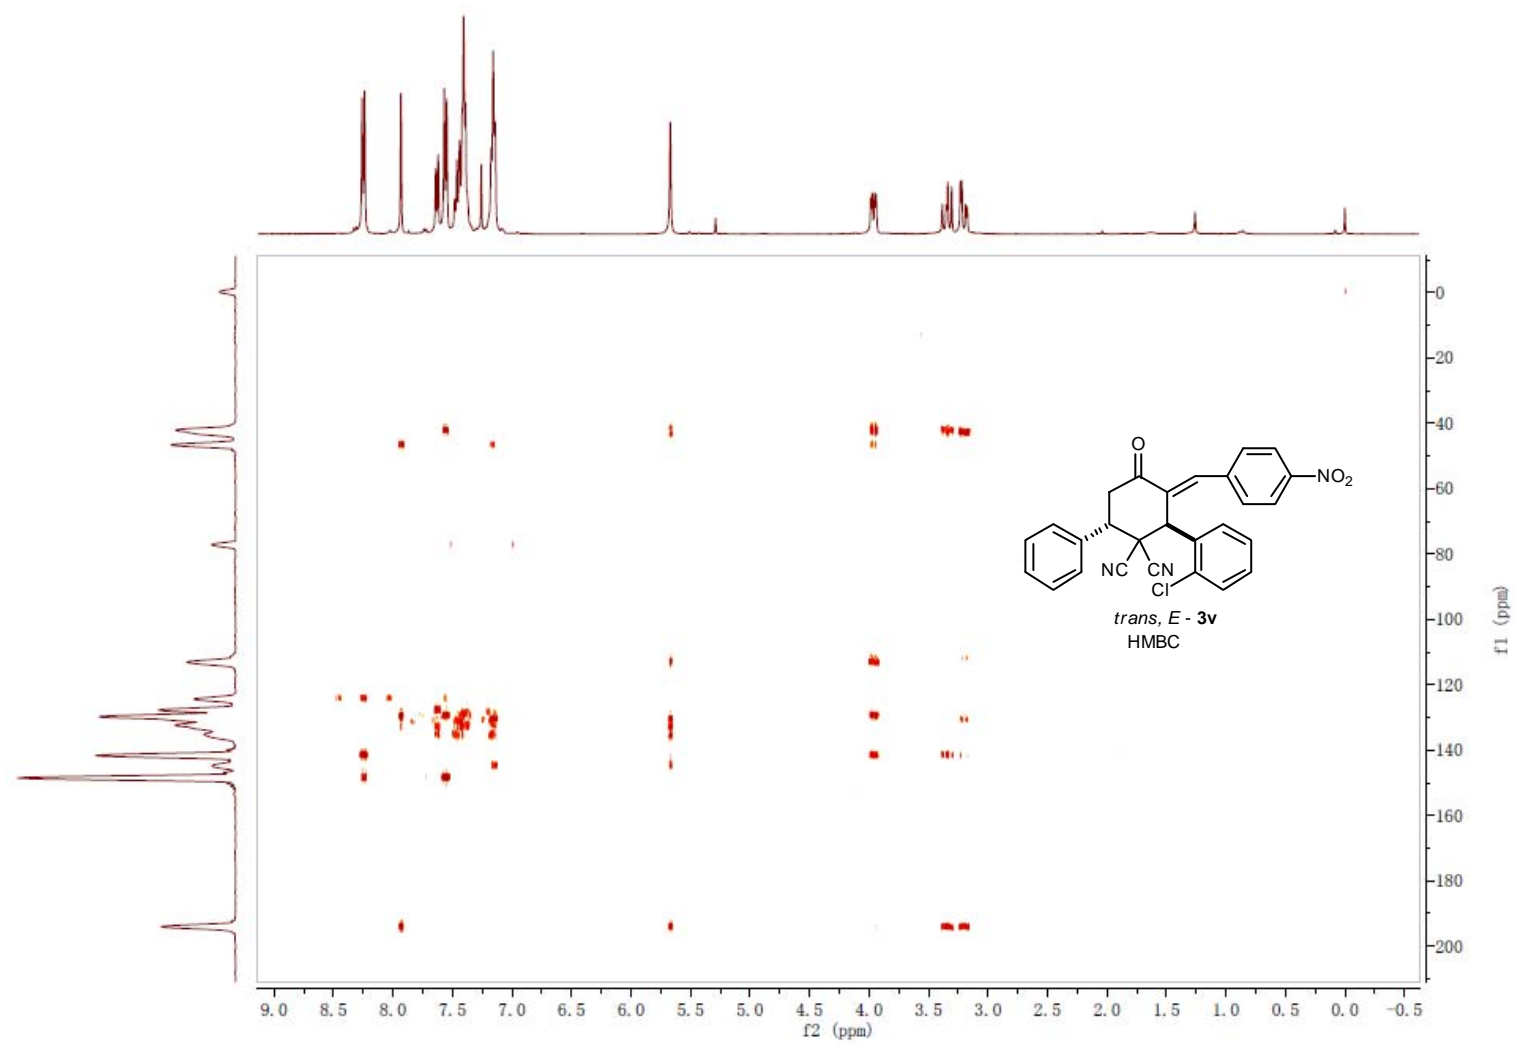

Zr-PhPh02S-0C1

Archive directory: /export/home/ding/vnmrsys/data  
Sample directory:  
File: PROTON

Pulse Sequence: NOESY  
Solvent: CDCl3  
Ambient temperature  
Mercury-300BB "NMR300"

Relax. delay 1.000 sec  
Mixing 0.250 sec  
Acq. Time 0.155 sec  
Width 3301.4 Hz  
2D Width 3301.4 Hz  
15 repetitions  
2 x 256 increments  
OBSERVE H1, 300.0706281 MHz  
DATA PROCESSING  
Gauss apodization 0.057 sec  
F1 DATA PROCESSING  
Gauss apodization 0.040 sec  
FT size 2048 x 2048  
Total time 3 hr, 33 min, 5 sec

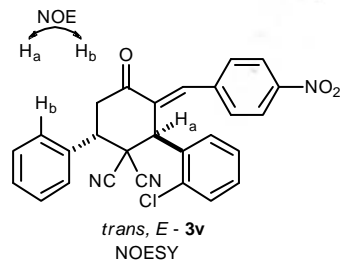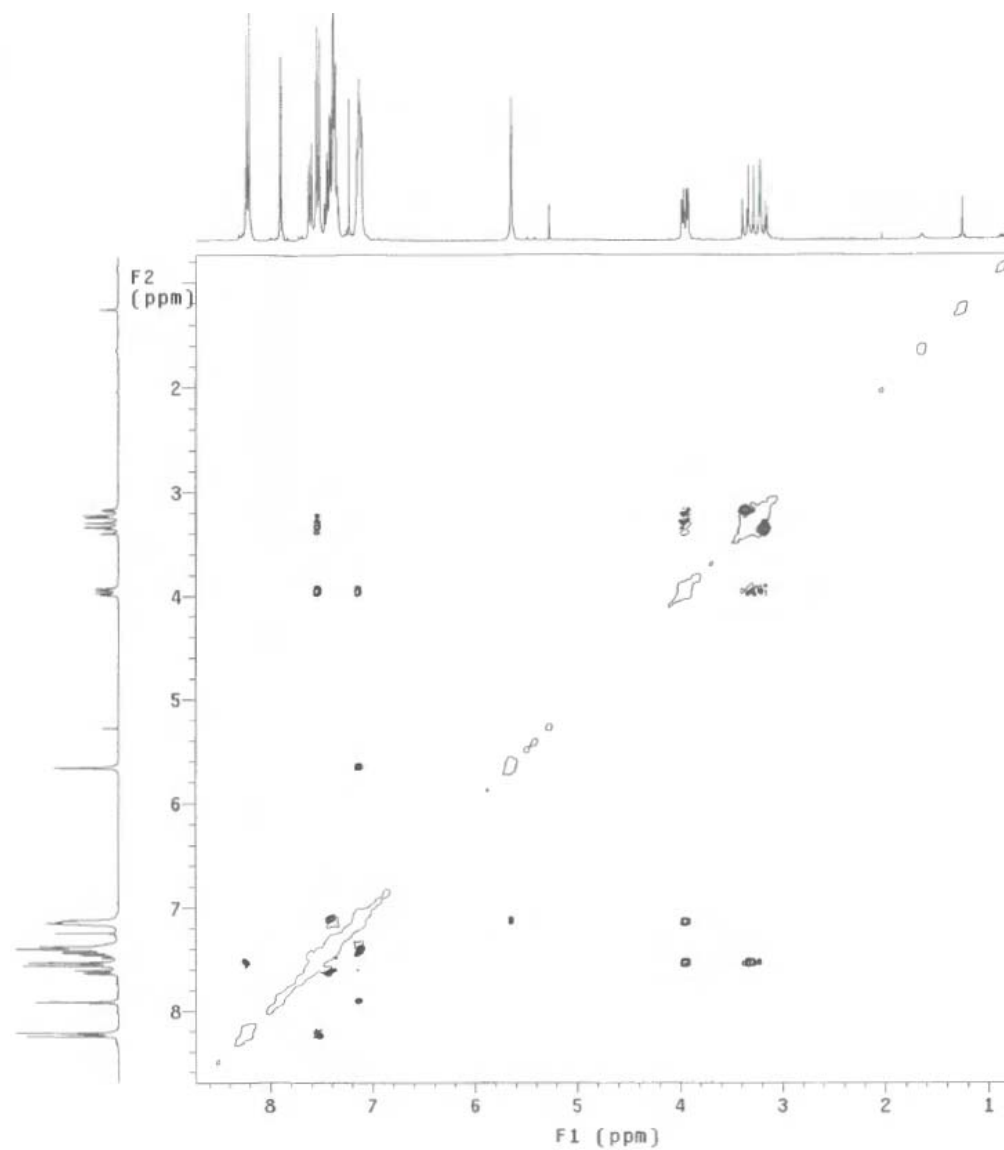

zr-reduc-1  
Archive directory: /export/home/ding/vnmrsys/data  
Sample directory:  
File: PROTON  
Pulse Sequence: NOESY  
Solvent: CDCl3  
Ambient temperature  
Mercury-300RS "NMR300"  
Relax. delay 1.000 sec  
Mixing 0.280 sec  
Acq. time 0.171 sec  
Width 2305.5 Hz  
2D Width 2305.5 Hz  
8 repetitions  
2 x 256 increments  
OBSERVE H1, 300.0706313 MHz  
DATA PROCESSING  
Gauss apodization 0.045 sec  
F1 DATA PROCESSING  
Gauss apodization 0.029 sec  
FT size 2048 x 2048  
Total time 1 hr, 50 min, 29 sec

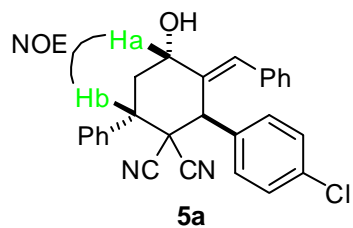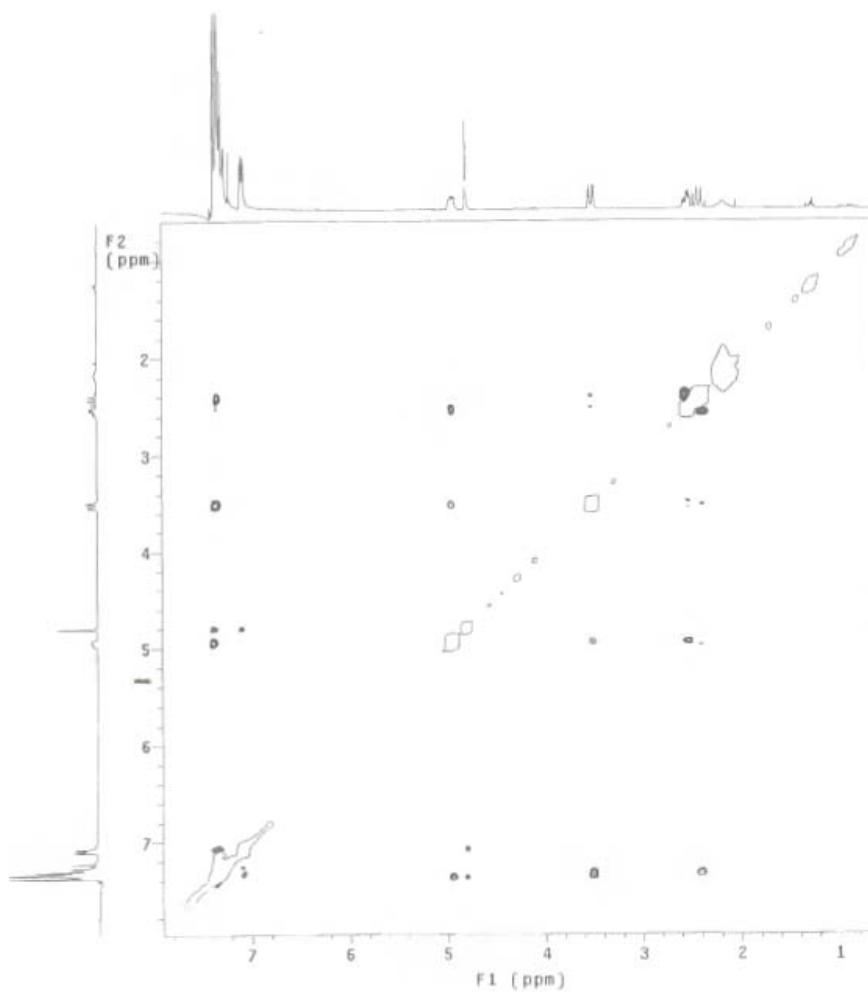

zr-spd-1  
Archive directory: /export/home/ding/vnmrsys/data  
Sample directory:  
File: PROTON  
Pulse Sequence: NQESY  
Solvent: CDCl3  
Ambient temperature  
Mercury-300SB "NMR300"  
Relax. delay 1.000 sec  
Mixing 8.278 sec  
Acq. time 0.170 sec  
Width 3016.6 Hz  
2D Width 3016.6 Hz  
18 repetitions  
2 x 256 increments  
OBSERVE H1, 300.0706244 MHz  
DATA PROCESSING  
Gauss apodization 0.038 sec  
F1 DATA PROCESSING  
Gauss apodization 0.033 sec  
FT size 2048 x 2048  
Total time 3 hr, 38 min, 24 sec

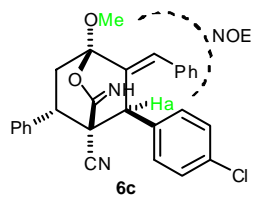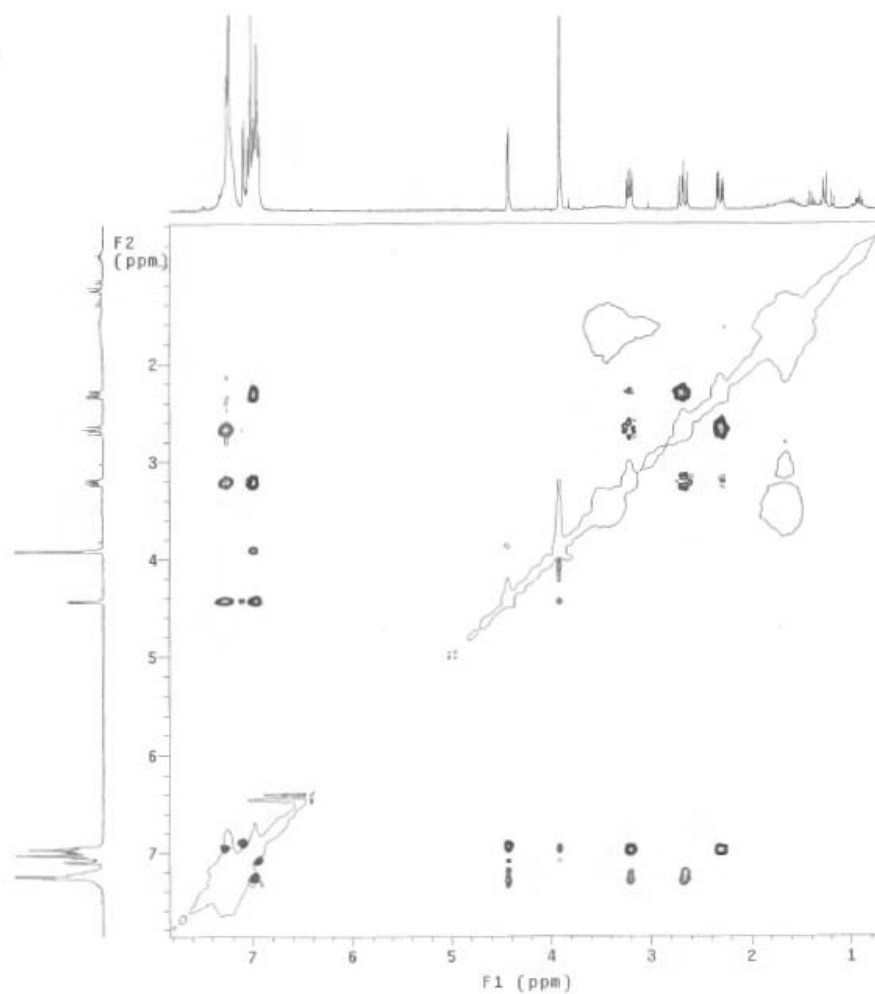

Supplement: c1ob06187a.pdf [file c1ob06187a.pdf]
